# Supplementary material for: Early prediction of physical activity level 1 year after stroke: a longitudinal cohort study
Source: PubMed Central journal article supplement — BMJ Open. 2017 Aug 4;7(8):e016369. doi: 10.1136/bmjopen-2017-016369 (PMC5634455; doi:10.1136/bmjopen-2017-016369), 2017-08-04
Supplement: bmjopen-2017-016369.draft_revisions.pdf [file bmjopen-2017-016369.draft_revisions.pdf]

# BMJ Open

BMJ Open is committed to open peer review. As part of this commitment we make the peer review history of every article we publish publicly available.

When an article is published we post the peer reviewers' comments and the authors' responses online. We also post the versions of the paper that were used during peer review. These are the versions that the peer review comments apply to.

The versions of the paper that follow are the versions that were submitted during the peer review process. They are not the versions of record or the final published versions. They should not be cited or distributed as the published version of this manuscript.

BMJ Open is an open access journal and the full, final, typeset and author-corrected version of record of the manuscript is available on our site with no access controls, subscription charges or pay-per-view fees (<http://bmjopen.bmj.com>).

If you have any questions on BMJ Open's open peer review process please email [editorial.bmjopen@bmj.com](mailto:editorial.bmjopen@bmj.com)

# BMJ Open

## Early prediction of physical activity level one year after stroke, a longitudinal cohort study.

|                                 |                                                                                                                                                                                                                                                                                                                   |
|---------------------------------|-------------------------------------------------------------------------------------------------------------------------------------------------------------------------------------------------------------------------------------------------------------------------------------------------------------------|
| Journal:                        | <i>BMJ Open</i>                                                                                                                                                                                                                                                                                                   |
| Manuscript ID                   | bmjopen-2017-016369                                                                                                                                                                                                                                                                                               |
| Article Type:                   | Research                                                                                                                                                                                                                                                                                                          |
| Date Submitted by the Author:   | 09-Feb-2017                                                                                                                                                                                                                                                                                                       |
| Complete List of Authors:       | Olsson, Ola; Univ of Gothenburg, Inst of Neuroscience and Physiology<br>Persson, Hanna; Univ of Gothenburg, Inst of Neuroscience and Physiology<br>Alt Murphy, Margit; Univ of Gothenburg, Inst of Neuroscience and Physiology<br>Sunnerhagen, Katharina; Univ of Gothenburg, Inst of Neuroscience and Physiology |
| <b>Primary Subject Heading</b>: | Rehabilitation medicine                                                                                                                                                                                                                                                                                           |
| Secondary Subject Heading:      | Neurology                                                                                                                                                                                                                                                                                                         |
| Keywords:                       | Stroke < NEUROLOGY, Physical activity, Motor activity, Prognosis, Outcome Assessment                                                                                                                                                                                                                              |
|                                 |                                                                                                                                                                                                                                                                                                                   |

SCHOLARONE™  
Manuscripts

**TITLE PAGE**

Early prediction of physical activity level one year after stroke, a longitudinal cohort study.

Author's: Ola A Olsson MD, PT, MSc, Hanna C Persson PT, PhD, Margit Alt Murphy PT, PhD, Katharina S Sunnerhagen MD, PhD.

Author's affiliations: Department of clinical neuroscience, Institute of Neuroscience and Physiology, Sahlgrenska Academy at University of Gothenburg, Gothenburg, Sweden.

Correspondence: Katharina S Sunnerhagen, Rehabilitation medicine, Sahlgrenska university hospital, Per Dubbsgatan 14, 3<sup>rd</sup> floor, 413 45 Gothenburg, SWEDEN

+46-31-342 2803, e-mail: ks.sunnerhagen@neuro.gu.se

Key words: Stroke, Physical activity, Motor activity, Prognosis, Outcome Assessment

Number of words: 3531

## ABSTRACT

**Objective:** To investigate which pre-stroke and early predictors those have impact on the level of physical activity one year post stroke.

**Design:** Prospective longitudinal cohort with logistic regression analysis.

**Setting:** Stroke Unit at Sahlgrenska University Hospital, Gothenburg, Sweden.

**Participants:** 117 patients admitted to the Stroke Unit during a period of 18 months in 2009-2010 were consecutively recruited. The inclusion criteria were: first-time stroke, impaired upper-extremity function, admitted to the Stroke Unit within 3 days since onset, local residency,  $\geq 18$  years old. The exclusion criteria were: upper extremity condition or severe multi-impairment prior to stroke, short life-expectancy, non-Swedish speaking. 77 patients were followed-up at one year post stroke.

**Primary outcome:** Physical activity level one year after stroke was assessed using a 6-level scale, which was first dichotomized into mostly inactive or mostly active, and secondly into low or moderate/high level of physical activity.

**Results:** Being mostly inactive one year after stroke could be predicted by age at stroke onset (OR 1.07, 95% CI 1.00-1.13,  $p=0.041$ ), functional dependency at discharge (OR 7.01, 95% CI 1.73-28.43,  $p=0.006$ ) and pre-stroke physical activity (OR 7.46, 95% CI 1.51-36.82,  $p=0.014$ ). Having a low level of physical activity one year after stroke could be predicted by age at stroke onset (OR 1.13, 95% CI 1.06-1.21,  $p<0.001$ ) and functional dependency at discharge (OR 3.62, 95% CI 1.09-12.04,  $p=0.036$ ).

**Conclusions:** Previous low level of physical activity, older age and functional dependency all provide value in predicting low physical activity one year after stroke. These results show that age and simple clinical evaluations early after stroke may help clinicians to identify patients at risk of being insufficiently active after stroke and target specific interventions to improve physical activity in this group.

**Clinical trial registration:** Clinical Trial Registration-URL: <http://www.clinicaltrials.gov>. Unique identifier: NCT01115348

## Strengths and limitations of the study

- Clinically important parameters prior to, and early after stroke were included
- Longitudinal consecutively recruited cohort study with one year follow-up time
- Clinically relevant dichotomization of physical activity levels produced interpretable data
- Despite relatively large cohort, the number of included predictors was limited due to small number of cases for some variables
- Patients with minor stroke showing no upper-extremity impairment early after stroke were not included

## INTRODUCTION

Low physical activity (PA) has shown to be an independent risk factor for stroke<sup>1-3</sup> and PA is a part of primary<sup>1</sup> as well as secondary prevention in most of the stroke guidelines<sup>4</sup>. The World Health Organization (WHO) has identified physical inactivity to be the fourth leading risk factor for overall global mortality<sup>5</sup>. The definition of PA according to WHO is "any bodily movement produced by skeletal muscles that requires energy expenditure – including activities undertaken while working, playing, carrying out household chores, travelling, and engaging in recreational pursuits"<sup>6</sup>. Higher PA level pre-stroke may predict a less severe stroke<sup>7, 8</sup>, decrease the overall risk for death from first time stroke<sup>9</sup> and is associated with a better functional status post stroke<sup>7, 10, 11</sup>.

It is a complex question to answer why some people are physically active after having a stroke and others are not? PA in healthy populations has shown to be influenced by factors such as age, gender, motivation, previous PA, self-efficacy and health status<sup>12, 13</sup>. Being physically active post-stroke is associated with a better quality of life and have a positive correlation to functional ability<sup>14</sup>. The PA level among stroke-survivors has been shown to be significantly lower than in a healthy reference-population<sup>15-19</sup> and correlate to walking ability, balance and physical fitness<sup>15</sup>, but cannot be explained by motor disability alone<sup>16, 20</sup>. Barriers to PA reported by stroke survivors include lack of motivation, fear of falling, inaccessibility to training centers and physical impairments<sup>21, 22</sup>. It is, however, not clear to what extent factors connected to the pre-stroke lifestyle and medical status may be associated with the PA level among stroke survivors. Identifying patients at risk of being inadequately active post stroke may help to target specific interventions for this group at an early stage. The purpose of this study is to investigate possible pre-stroke and early predictor variables that may impact the PA level one year after first time stroke.

## MATERIALS AND METHODS

### Population and data collection

This longitudinal study is a part of the Stroke Arm Longitudinal study at the University of Gothenburg (SALGOT)<sup>23</sup>, with the original purpose to describe upper extremity functioning after stroke. Over a period of eighteen months, in 2009-2010, patients were included to the SALGOT-study from one of the largest out of three Stroke Units at the Sahlgrenska University Hospital, Gothenburg, with the following inclusion criteria: 1) first-time stroke according to International Classification of Diseases codes I61 intracerebral hemorrhage or I63 ischemic stroke; 2) impaired upper-extremity function, defined as not achieving the maximal points at the Action Research Arm Test (ARAT)<sup>24</sup> three days post-stroke; 3) admitted to the Stroke Unit within three days since stroke onset; 4) residency in the Gothenburg urban area, within 35km from the hospital; 5)  $\geq 18$  years of age. The exclusion criteria were: 1) an upper extremity injury/condition prior to stroke; 2) severe multi-impairments or diminished physical condition prior to stroke; 3) short life-expectancy; 4) non-Swedish speaking. Three experienced physiotherapists performed all clinical assessments at hospital or in the patient's home according to a standardized protocol<sup>23</sup>. From a total cohort of 763 patients, 117 patients were included in the SALGOT study, and 77 still remained in the study at one year post stroke (fig.1). The main reason for not being assessed at one year was that the patients had died (n=14) (fig 1). The study was approved by The Regional Ethical Review Board in Gothenburg (225-08). All participants or their next of kin gave written informed consent. The STROBE-guidelines for reporting observational data were followed<sup>25</sup>.

### Potential predictor variables

Potential predictors prior and close to the stroke onset, theorized to have impact on PA, were considered for model building. Prior stroke predictor variables included in the analyses were: smoking, living alone, TIA, diabetes, atrial fibrillation, treatment for high blood pressure and PA level. Other predictors included were: age, gender, type of stroke, stroke severity, upper extremity functioning three days post stroke and functional dependency at discharge (table 1).



Table 1. Demographics, clinical characteristics and considered predictor variables.

| Demographic and clinical characteristics n=77                |             |
|--------------------------------------------------------------|-------------|
| Age at stroke onset, mean (SD)                               | 67.2 (11.9) |
| Men, n (%)                                                   | 46 (59.7)   |
| Hemorrhagic stroke, n (%)                                    | 11 (14.3)   |
| Smoking <sup>1</sup> , n (%), n=76                           | 18 (23.7)   |
| Living alone <sup>1</sup> , n (%)                            | 31 (40.3)   |
| TIA/Amaurosis Fugax <sup>1</sup> , n (%), n=76               | 4 (5.3)     |
| Diabetes <sup>1</sup> , n (%)                                | 10 (13)     |
| Atrial Fibrillation <sup>1</sup> , n (%), n=76               | 11 (14.5)   |
| Treatment for high blood pressure <sup>1</sup> , n (%), n=76 | 26 (34.2)   |
| NIHSS at admission, median (q1-q3)                           | 7 (3-12.5)  |
| ARAT at three days, median (q1-q3), n=74                     | 7 (0-47)    |
| mRS at discharge from Stroke Unit, n (%).                    |             |
| independent walkers (grade 0-3)                              | 37 (48.1)   |
| unable to walk independently (grade 4-6)                     | 40 (51.9)   |
| Pre-stroke PA, n (%), n=73                                   |             |
| mostly inactive (grade 1-2),                                 | 19 (26.0)   |
| low (grade 1-3)                                              | 43 (58.9)   |

<sup>1</sup> = prior to stroke.

Abbreviations: SD= Standard Deviation, y/n=yes/no, TIA=Transient Ischemic Attack, NIHSS=National Institute of Stroke Scale, ARAT=Action Research Arm Test, mRS=modified Rankin Scale, PA=Physical Activity, q1-q3=1<sup>st</sup> to 3<sup>rd</sup> quartile.

Information of history of smoking, whether the patient shared livings with another adult and medical history prior to stroke were acquired by the national Swedish Stroke Register<sup>26</sup> or medical charts. The stroke severity at admission to the hospital was assessed using the National Institute of Health Stroke Scale (NIHSS)<sup>27</sup>. The upper extremity functioning was

1  
2  
3 assessed using the ARAT, which includes 19 items scored on a 4-grade ordinal scale, with a  
4  
5 total score varying from 0-57 points, where a higher score indicates less limitation<sup>24</sup>. The  
6  
7 functional dependency at discharge from the Stroke Unit (mean time 13 days, SD=7,4 range  
8  
9 1-42) was assessed using the modified Rankin Scale (mRS)<sup>28</sup>. The mRS is an ordinal scale  
10  
11 ranging from 0 to 6 where lower numbers indicates less dependency<sup>28</sup>. The mRS was  
12  
13 dichotomized between the grade 3 and 4 creating one group that contained patients able to  
14  
15 walk without assistance (no/slight/moderate disability) and one group who could not  
16  
17 (moderately severe to severe disability). The self-reported PA level was recorded using a 6-  
18  
19 level scale for classification of physical activity level (including leisure-time, occupational  
20  
21 and household activities) (appendix A), originally developed from the 4 graded Saltin-Grimby  
22  
23 scale<sup>29,30</sup>. The participants' PA level was scored through an interview within three days and at  
24  
25 one year post stroke considering the PA level during the previous six months. In the statistical  
26  
27 analyses, the PA was dichotomized in two different ways. First, to mostly inactive (grade 1-2)  
28  
29 or mostly active (grade 3-6) and; secondly, to low (grade 1-3) or moderate/high activity level  
30  
31 (4-6). The first dichotomization was selected to match the original 4-level scale based upon  
32  
33 prevention of cardiovascular disease<sup>31</sup>. The second dichotomization was selected to match the  
34  
35 level of physical activity (of 30 minutes of activity, 5 days per week) recommended by the  
36  
37 WHO in order to prevent morbidity<sup>6</sup>. Within each prediction model, the same dichotomization  
38  
39 of PA level was used for outcome and for predictor variable.  
40  
41  
42  
43  
44  
45  
46  
47

## 48 **Statistics**

49  
50 Differences between groups were investigated with Fishers exact test, Mann-Whitney U test  
51  
52 or t-test depending on data level. Demographic data was presented with medians and  
53  
54 percentiles or means and standard deviation (SD). The statistically significant level was set to  
55  
56  $p < 0.05$  unless stated otherwise. A multivariate logistic regression was used to investigate  
57  
58  
59  
60

1  
2  
3 which predictor variables may impact on the PA level one year after stroke. Two separate  
4  
5 models were built, one for each dichotomization of the outcome variable. As first step in  
6  
7 selection of potential predictor variables for the regression models, the cross tabulation was  
8  
9 used to identify and exclude predictor variables with less than 5 observations in any subgroup.  
10  
11 Collinearity between predictor variables was checked for using Spearman's rank correlation  
12  
13 test for ordinal variables or Likelihood Ratio test for binary variables. Variables with  
14  
15 correlation above 0.7 were considered for collinearity. A series of univariate logistic  
16  
17 regression analysis was performed in order to identify significant variables for further  
18  
19 analyzes (significance level  $p < 0.25$ , tested with Wald's test). The multivariate models were  
20  
21 then built on the enter method in which all predictor variables not reaching the significance  
22  
23 level of 0.05 were ruled out. Individuals with missing data on any of the variables included in  
24  
25 the final multivariate models were excluded for analysis. All the previously ruled out  
26  
27 variables were then re-inserted in the final model one by one to check for possible significant  
28  
29 effect in the model ( $p < 0.05$ , Likelihood Ratio test). The final models were analyzed with the  
30  
31 Likelihood Ratio test, percent of correct classification, Nagelkerke  $R^2$  and the Hosmer and  
32  
33 Lemeshow goodness of fit test. Results are presented as Odds-Ratio (OR) with 95%  
34  
35 confidence interval (CI). Data was analyzed using the Statistical Package for Social Sciences  
36  
37 (SPSS) software (IBM SPSS Statistics for Mac, Version 23.0. Armonk, NY: IBM Corp.)  
38  
39  
40  
41  
42  
43  
44  
45  
46

## 47 RESULTS

### 50 Clinical characteristics

51  
52 The group of non-participants not assessed at one year from the SALGOT cohort ( $n=40$ ) was  
53  
54 older (mean difference 6.23 years,  $p=0.01$ ), had a higher incidence of atrial fibrillation  
55  
56 ( $p=0.04$ ) and were less active prior to their stroke ( $p=0.03$ ). No other statistical significant  
57  
58  
59  
60

1  
2  
3 differences were found between the groups. Demographic and clinical characteristics are  
4 presented in table 1. Prior to stroke, 74% (n=54) of the patients with stroke were considered to  
5 be mostly active, in contrast to 61% (n= 47) at one year post stroke. Similarly, 41% (n=30) of  
6 the patients with stroke had a moderate to high activity level prior to stroke in contrast to 34%  
7 (n=26) one year later.  
8  
9  
10  
11  
12

### 13 14 15 16 **Selection of predictor variables**

17  
18 The type of stroke along with smoking, TIA, diabetes and atrial fibrillation prior to stroke  
19 contained too few individuals in subgroups and were therefore not included into further  
20 analysis. Strong significant collinearity was found between the predictor variables: mRS and  
21 ARAT (-0.74). These two variables were therefore entered into separate models and their  
22 impact to respective model compared. Likelihood Ratio Test showed a significant correlation  
23 between gender and pre-stroke PA (p=0.02) and between treatment for high blood pressure  
24 prior to stroke and pre-stroke PA (p=0.01). The results from the univariate analysis are  
25 presented in an online supplementary table (appendix B). None of the variables that were re-  
26 inserted in the final step for the multivariate analysis was significant (p>0.05).  
27  
28  
29  
30  
31  
32  
33  
34  
35  
36  
37  
38  
39  
40  
41

### 42 **Predicting being mostly inactive**

43  
44 The final model for predicting being mostly inactive post stroke included three significant  
45 predictor variables: age, functional dependency (mRS) and pre-stroke PA (table 2a).  
46  
47  
48  
49  
50  
51  
52  
53  
54  
55  
56  
57  
58  
59  
60

Table 2. Logistic Regression models for predicting physical activity level one year post stroke; a) dependent variable of mostly inactive (n=73); b) dependent variable of low level of physical activity (n=77).

| <b>2a</b>                                  |          |            |                        |           |          |                    |
|--------------------------------------------|----------|------------|------------------------|-----------|----------|--------------------|
| <b>Coefficient</b>                         | <b>B</b> | <b>S.E</b> | <b>Wald's</b>          | <b>df</b> | <b>P</b> | <b>OR (95% CI)</b> |
| <b>Constant</b>                            | -6.52    | 2.15       | 9.17                   | 1         | 0.002    | 0.001              |
| <b>Age</b>                                 | 0.06     | 0.03       | 4.18                   | 1         | 0.041    | 1.07 (1.00-1.13)   |
| <b>mRS at discharge</b>                    | 1.95     | 0.71       | 7.43                   | 1         | 0.006    | 7.01 (1.73-28.43)  |
| <b>Pre-stroke PA<br/>(mostly inactive)</b> | 2.01     | 0.81       | 6.10                   | 1         | 0.014    | 7.46 (1.51-36.82)  |
| <b>Test</b>                                |          |            | <b>chi<sup>2</sup></b> | <b>df</b> | <b>P</b> |                    |
| <b>Likelihood Ratio Test</b>               |          |            | 32.59                  | 3         | <0.001   |                    |
| <b>Hosmer and<br/>Lemeshow</b>             |          |            | 9.66                   | 8         | 0.290    |                    |
| <b>2b</b>                                  |          |            |                        |           |          |                    |
| <b>Constant</b>                            | -8.12    | 2.25       | 13.03                  | 1         | <0.001   | <0.001             |
| <b>Age</b>                                 | 0.13     | 0.03       | 13.52                  | 1         | <0.001   | 1.13 (1.06-1.21)   |
| <b>mRS at discharge</b>                    | 1.29     | 0.61       | 4.41                   | 1         | 0.036    | 3.62 (1.09-12.04)  |
| <b>Test</b>                                |          |            | <b>chi<sup>2</sup></b> | <b>df</b> | <b>P</b> |                    |
| <b>Likelihood Ratio Test</b>               |          |            | 30.47                  | 2         | <0.001   |                    |
| <b>Hosmer and<br/>Lemeshow</b>             |          |            | 3.28                   | 7         | 0.858    |                    |

Dependent variable coded as a) mostly active=0, mostly inactive=1; b) moderate/high PA=0, low PA=1; Cox & Snell R<sup>2</sup> a) = 0.360; b) = 0.327 Nagelkerke R<sup>2</sup> a) = 0.489; b) = 0.453  
Abbreviations: OR=Odds Ratio, S.E=Standard Error, df=Degrees of freedom PA=Physical Activity, mRS=modified Rankin Scale

The percentage of total correctly classified for the model was 78.1 with sensitivity 75.0% and specificity of 79.5%. The odds for being mostly inactive one year after stroke, increased by 7% for every year of increasing age. The odds for being inactive also increased by 6 times if

1  
2  
3 the patient was not able to walk independently at discharge and by 6.5 times if the patient was  
4  
5 already mostly inactive pre-stroke. Predicted probabilities for this model are presented in  
6  
7 Figure 2. A separate model including the three significant predictor variables, age, ARAT  
8  
9 (instead of mRS) and pre-stroke PA demonstrated comparable level of correct classification  
10  
11 (78.6%).  
12

### 13 14 15 16 17 18 **Predicting low physical activity**

19  
20 The final model for predicting low PA level included two significant predictor variables: age  
21  
22 and functional dependency (mRS) at discharge from Stroke Unit (table 2b).  
23

24  
25 The percentage of total correctly classified for the model was 74.0 with sensitivity 77.2% and  
26  
27 specificity of 65.0%. The odds of having a low PA level one year after stroke increased with  
28  
29 13% for every year of increasing age. The odds of having a low PA level also increased, by  
30  
31 2.6 times if the patient was not able to walk independently at discharge. Predicted  
32  
33 probabilities for this model are presented in Figure 3. A separate model including the two  
34  
35 significant predictor variables, age and ARAT (instead of mRS) demonstrated comparable  
36  
37 level of correct classification (75.7%).  
38  
39  
40  
41  
42

## 43 44 **DISCUSSION**

45  
46 Higher age, functional dependency at discharge from stroke unit and being physically inactive  
47  
48 prior to stroke all contributed to increase the probability of being physically inactive one year  
49  
50 after stroke. The probability of having a low PA level after stroke increased with older age  
51  
52 and functional dependency at discharge from stroke unit. Findings from this study provide  
53  
54 new insights on what factors obtained early after stroke may impact on the PA level at later  
55  
56 stages among stroke survivors. This information would allow an early identification of  
57  
58  
59  
60

1  
2  
3 patients at risk for inactivity or low PA level, so that targeted intervention could be offered as  
4  
5 part of secondary prevention.  
6  
7

8  
9  
10 When comparing levels of physical activity two different dichotomizations of data (two  
11 models), based on different recommendations on physical activity was used<sup>6, 29</sup>. The first  
12 model aimed to address inactivity as important cut-off for prevention of cardiovascular  
13 disease<sup>31</sup> and the second to address PA at lower than the recommended level required for  
14 prevention of morbidity<sup>6</sup>. Age was found to be a significant predictor in both models, but it  
15 had a greater impact on the model for identifying those with low PA level. This finding is in  
16 concurrence with an earlier study in older adults, where the age was inversely correlated with  
17 the amount of moderate-intensity PA, but not with the amount of low-intensity PA<sup>32</sup>.  
18  
19 Functional dependency including ability to walk independently or not, was also found as a  
20 significant predictor for physical activity after stroke in both models, which is in concurrence  
21 with previous studies<sup>15, 21</sup>. These findings suggest that, similarly to older adults, age may have  
22 a greater impact on the intensity of PA after stroke, but also that the disability level expressed  
23 as dependence in walking and daily activities influence the PA level at later stages post  
24 stroke. The upper extremity functioning (ARAT) early after stroke was found to have similar  
25 effect on the later post stroke PA, as the functional dependency (mRS) at discharge. This  
26 indicates that other measures of activity limitations might also be suitable for prediction of  
27 PA. Being mostly inactive pre-stroke had a significant effect when predicting inactivity at  
28 later stage post-stroke. However, the level of PA pre-stroke, low or moderate/high, did not  
29 have a significant effect in the model predicting post stroke PA level, which indicate that the  
30 level of PA post stroke may to larger degree be affected by other factors, such as the disability  
31 level and age.  
32  
33  
34  
35  
36  
37  
38  
39  
40  
41  
42  
43  
44  
45  
46  
47  
48  
49  
50  
51  
52  
53  
54  
55  
56  
57  
58  
59  
60

1  
2  
3 There has been little interest in investigating which early predictors might influence PA  
4 among stroke-survivors and most studies on PA look at cross-sectional correlations. A  
5 previous longitudinal study<sup>33</sup> investigating physical inactivity after stroke, found significant  
6 correlation between time spent upright and degree of independence in activities of daily living  
7 and walking at the first weeks after stroke, as well as at 1, 2 and 3 years post stroke. Although  
8 these findings reflect merely cross-sectional correlations, they indicate that independence in  
9 daily activities and ambulation are important for PA among stroke-survivors. In a review  
10 comprising people after stroke with ability to walk,<sup>15</sup> walking ability, balance and physical  
11 fitness were positively associated with PA level. Walking ability in the form of walking speed  
12 has further been found to explain some of the variation of PA level among stroke-survivors<sup>16</sup>.  
13 Studies on what stroke-survivors experience as barriers to PA have identified physical  
14 impairment as one of the main barriers to PA<sup>21,22</sup>, yet motor impairment have been found to  
15 correlate mainly with walking capacity and energy cost for walking and not with PA level in  
16 stroke patients<sup>17</sup>. In another study physical capacity, measured by a test for fitness, was found  
17 to have a moderate correlation to self-assessed PA<sup>34</sup>. In our study the mRS-scale addressing  
18 disability rather than impairment was used<sup>28</sup> and although disability and impairment are  
19 correlated, impairment does not fully explain disability among stroke patients<sup>20</sup>. Previous  
20 studies have not shown significant correlation between age and PA after stroke<sup>15,33</sup>. Age has,  
21 however, been found to be inversely correlated to PA in healthy populations<sup>12,35</sup>, although not  
22 as a clear determinant compared to health status or previous PA habits<sup>12</sup>. The decline in PA  
23 with increasing age does not seem to be linear but exponential in older adults<sup>35</sup> and functional  
24 outcome has been found to drop steeply in the older ages among stroke patients<sup>36</sup>, yet most  
25 work on PA among stroke-survivors have been made in patients aged 65 to 75 years<sup>15</sup>. The  
26 present study had no upper limit of age and so was able to include some of the elderly  
27 patients, yet the group of patients in this study were somewhat younger than the average  
28  
29  
30  
31  
32  
33  
34  
35  
36  
37  
38  
39  
40  
41  
42  
43  
44  
45  
46  
47  
48  
49  
50  
51  
52  
53  
54  
55  
56  
57  
58  
59  
60



1  
2  
3 stroke-population in Sweden<sup>26</sup>, therefore, the effect of age on PA level in stroke-survivors  
4  
5 might be slightly underestimated.  
6

7  
8 Pre-stroke PA has been found to have a significant impact on functional outcome at acute  
9  
10 phase<sup>11</sup>, 3 months<sup>10, 19</sup>, one year<sup>11</sup> and two years after stroke<sup>7</sup>. A longitudinal study<sup>11</sup> showed  
11  
12 that the main differences for functional outcome were found when comparing a subgroup with  
13  
14 relatively low PA level, measured as people who walked less than 30 minutes per day with  
15  
16 groups walking for more than 30 minutes a day. The group with low amount of walking time  
17  
18 was more dependent as measured by the mRS-scale and the Barthel Index and had a slower  
19  
20 walking speed. These differences were not seen when comparing one group that walked for  
21  
22 30-60 minutes per day with another group who walked for more than 60 minutes per day<sup>11</sup>.  
23  
24 These results are in line with the findings in our study showing that being mostly active, as  
25  
26 analyzed in the first model, was important for staying active, whilst a higher PA level made  
27  
28 no further contribution in predicting a higher PA level post stroke. Pre-stroke habits of PA  
29  
30 may also possibly mean having some knowledge about PA and its beneficial health effects,  
31  
32 while lack of knowledge and disbeliefs related to PA have been reported as barriers to PA by  
33  
34 stroke-survivors<sup>21, 22</sup> and could be a part of the explanation of our finding that pre-stroke PA  
35  
36 level is important for being active after stroke.  
37  
38  
39  
40  
41  
42

43 The strength of this study was that many clinically important parameters that can be obtained  
44  
45 early post stroke were considered as potential predictors for long-term outcome of PA level. It  
46  
47 is of clinical importance to identify patients at risk of becoming inactive at an early stage,  
48  
49 since PA after stroke may help in preventing secondary complications<sup>4</sup>. Furthermore the  
50  
51 dichotomizations for PA level used in the study are clinically relevant and concurrent with  
52  
53 recommendations for prevention of morbidity. There are, however, several limitations to this  
54  
55 study, including a low number of cases in some subgroups that did not allow inclusion of all  
56  
57  
58  
59  
60

1  
2  
3 potential predictor variables into the regression models. The main outcome variable for PA  
4  
5 was an interview based questionnaire<sup>29,30</sup>. This type of scale presents with some problems  
6  
7 including being at an ordinal level of data and the risk for recall bias<sup>37</sup>. There is only a limited  
8  
9 number of studies investigating validity of the 6-graded scale used in this study<sup>38</sup>. The  
10  
11 dichotomization used in the first model between grade 2 and 3 may, however, be directly  
12  
13 translated into the original 4-grade Saltin-Grimby scale<sup>29,30</sup>, which has been widely used and  
14  
15 shown to have a good concurrent validity<sup>38</sup>. Self-assessed PA has also been shown to have  
16  
17 good predictor value for cardiovascular risk profiles<sup>39</sup> as well as for functional outcome after  
18  
19 stroke<sup>19</sup>. The alternative option for reporting PA is direct measurement, e.g. through using  
20  
21 accelerometers<sup>37</sup>. This option would not have been possible for establishing PA level prior to  
22  
23 stroke, but could have been for outcome. There are several other variables, such as mood,  
24  
25 balance scales<sup>40</sup>, fear of falling<sup>20</sup> lack of motivation and environmental factors<sup>21</sup> that may  
26  
27 influence PA after stroke that were not taken into account in the current study. Furthermore,  
28  
29 our study included patients with an impaired upper extremity function only, leading to risk of  
30  
31 selection bias by indirectly excluding patients with minor stroke.  
32  
33  
34  
35  
36  
37

38  
39 The present study aimed to predict patients that have a higher risk in becoming inactive after  
40  
41 their stroke. The problem of inactivity amongst patients with stroke is well established and  
42  
43 recent recommendations have highlighted the challenges in increasing the physical activity  
44  
45 amongst these patients<sup>4</sup>. By identifying which patients that have an increased risk of  
46  
47 becoming inactive clinicians may be able to identify these patients earlier and help prevent  
48  
49 them from falling into a vicious circle of inactivity and secondary complications<sup>4</sup>.  
50  
51  
52

## 53 CONCLUSION

54  
55 Physical inactivity among stroke survivors is a major clinical problem. The present study  
56  
57 showed that patients with a higher age, higher degree of functional dependency early after  
58  
59

1  
2  
3 stroke and a history of inactivity prior to stroke are at increased risk of being insufficiently  
4  
5 active at one year post stroke. By these findings, clinicians may be able to identify patients in  
6  
7 need of targeted interventions for reaching an adequate amount of PA. The list of predictor  
8  
9 variables identified in this study contribute, but cannot explain all of the variation of PA level  
10  
11 among stroke-survivors and other predictors need to be further explored.  
12  
13  
14  
15  
16  
17  
18  
19  
20  
21  
22  
23  
24  
25  
26  
27  
28  
29  
30  
31  
32  
33  
34  
35  
36  
37  
38  
39  
40  
41  
42  
43  
44  
45  
46  
47  
48  
49  
50  
51  
52  
53  
54  
55  
56  
57  
58  
59  
60

For peer review only

**Online supplements:**

Appendix A: Scale for physical activity

Appendix B: Supplementary table of univariate logistic regression

**Acknowledgment:** The authors thank Eva-Lena Bustrén for data collection and the Riks-stroke Collaboration for help with baseline data.

**Contributors:** OAO, HCP, MAM, KSS contributed to the design of the study concept, in analysis and interpretation of results and in drafting/revising the manuscript for content. All authors have read and approved the final manuscript. In addition to this HCP and MAM performed the acquisition of data, HCP, MAM and KSS obtained funding, OAO performed the statistical analysis and KSS supervised the SALGOT-study.

**Funding:** This study was funded in parts by the Swedish Research Council (VR 2012-70X-22122-01-3), the Norrbacka Eugenia Foundation, the Foundation of the Swedish National Stroke Association, Promobila, the Swedish Brain Foundation and the Swedish Heart-Lung Foundation.

**Competing interest:** The authors declare that they have no competing interests.

**Data Sharing:** Interested researchers may submit requests for data to the authors (contact [ks.sunnerhagen@neuro.gu.se](mailto:ks.sunnerhagen@neuro.gu.se)). According to the Swedish regulation (<http://www.epn.se/en/start/regulations/>) the permission to use data is only for what has been applied for and then approved by the Ethical board.

## REFERENCES

1. O'Donnell MJ, Xavier D, Liu L, et al. Risk factors for ischaemic and intracerebral haemorrhagic stroke in 22 countries (the INTERSTROKE study): a case-control study. *Lancet* 2010;**376**(9735):112-23doi:10.1016/S0140-6736(10)60834-3.
2. Lee CD, Folsom AR, Blair SN. Physical activity and stroke risk: a meta-analysis. *Stroke* 2003;**34**(10):2475-81doi:10.1161/01.STR.0000091843.02517.9D.
3. Wendel-Vos GC, Schuit AJ, Feskens EJ, et al. Physical activity and stroke. A meta-analysis of observational data. *Int J Epidemiol* 2004;**33**(4):787-98doi:10.1093/ije/dyh168.
4. Billinger SA, Arena R, Bernhardt J, et al. Physical activity and exercise recommendations for stroke survivors: a statement for healthcare professionals from the American Heart Association/American Stroke Association. *Stroke* 2014;**45**(8):2532-53doi:10.1161/STR.0000000000000022.
5. World Health Organization. Global health risks: mortality and burden of disease attributable to selected major risks. . Geneva, 2009.
6. WHO: global recommendations on physical activity for health 2010 [Available from: [http://apps.who.int/iris/bitstream/10665/44399/1/9789241599979\\_eng.pdf](http://apps.who.int/iris/bitstream/10665/44399/1/9789241599979_eng.pdf)].
7. Krarup LH, Truelsen T, Gluud C, et al. Prestroke physical activity is associated with severity and long-term outcome from first-ever stroke. *Neurology* 2008;**71**(17):1313-8doi:10.1212/01.wnl.0000327667.48013.9f.
8. Deplanque D, Masse I, Libersa C, et al. Previous leisure-time physical activity dose dependently decreases ischemic stroke severity. *Stroke Res Treat* 2012;**2012**:614925doi:10.1155/2012/614925.
9. Hallmarker U, Asberg S, Michaelsson K, et al. Risk of Recurrent Stroke and Death After First Stroke in Long-Distance Ski Race Participants. *J Am Heart Assoc* 2015;**4**(10):e002469doi:10.1161/JAHA.115.002469.

- 1  
2  
3 10. Stroud N, Mazwi TM, Case LD, et al. Prestroke physical activity and early functional status after  
4 stroke. *J Neurol Neurosurg Psychiatry* 2009;**80**(9):1019-22doi:10.1136/jnnp.2008.170027.  
5  
6  
7 11. Ursin MH, Ihle-Hansen H, Fure B, et al. Effects of premorbid physical activity on stroke severity  
8 and post-stroke functioning. *J Rehabil Med* 2015;**47**(7):612-7doi:10.2340/16501977-1972.  
9  
10  
11 12. Bauman AE, Reis RS, Sallis JF, et al. Correlates of physical activity: why are some people physically  
12 active and others not? *Lancet* 2012;**380**(9838):258-71doi:10.1016/S0140-6736(12)60735-1.  
13  
14  
15 13. Trost SG, Owen N, Bauman AE, et al. Correlates of adults' participation in physical activity: review  
16 and update. *Med Sci Sports Exerc* 2002;**34**(12):1996-  
17  
18 2001doi:10.1249/01.MSS.0000038974.76900.92.  
19  
20  
21  
22 14. Rand D, Eng JJ, Tang PF, et al. Daily physical activity and its contribution to the health-related  
23 quality of life of ambulatory individuals with chronic stroke. *Health Qual Life Outcomes*  
24  
25 2010;**8**:80doi:10.1186/1477-7525-8-80.  
26  
27  
28  
29 15. English C, Manns PJ, Tucak C, et al. Physical activity and sedentary behaviors in people with stroke  
30 living in the community: a systematic review. *Phys Ther* 2014;**94**(2):185-  
31  
32 96doi:10.2522/ptj.20130175.  
33  
34  
35 16. Danielsson A, Meirelles C, Willen C, et al. Physical activity in community-dwelling stroke survivors  
36 and a healthy population is not explained by motor function only. *PM R* 2014;**6**(2):139-  
37  
38 45doi:10.1016/j.pmrj.2013.08.593.  
39  
40  
41  
42 17. Danielsson A, Willen C, Sunnerhagen KS. Physical activity, ambulation, and motor impairment late  
43 after stroke. *Stroke Res Treat* 2012;**2012**:818513doi:10.1155/2012/818513.  
44  
45  
46 18. Rand D, Eng JJ, Tang PF, et al. How active are people with stroke?: use of accelerometers to  
47 assess physical activity. *Stroke* 2009;**40**(1):163-8doi:10.1161/STROKEAHA.108.523621.  
48  
49  
50  
51 19. Lopez-Cancio E, Ricciardi AC, Sobrino T, et al. Reported Prestroke Physical Activity Is Associated  
52 with Vascular Endothelial Growth Factor Expression and Good Outcomes after Stroke. *J*  
53  
54 *Stroke Cerebrovasc Dis* 2017;**26**(2):425-30doi:10.1016/j.jstrokecerebrovasdis.2016.10.004.  
55  
56  
57  
58  
59  
60

- 1  
2  
3 20. Roth EJ, Heinemann AW, Lovell LL, et al. Impairment and disability: their relation during stroke  
4  
5 rehabilitation. *Arch Phys Med Rehabil* 1998;**79**(3):329-35  
6  
7 21. Nicholson S, Sniehotta FF, van Wijck F, et al. A systematic review of perceived barriers and  
8  
9 motivators to physical activity after stroke. *Int J Stroke* 2013;**8**(5):357-64doi:10.1111/j.1747-  
10  
11 4949.2012.00880.x.  
12  
13 22. Jackson S, Mercer C, Singer BJ. An exploration of factors influencing physical activity levels  
14  
15 amongst a cohort of people living in the community after stroke in the south of England.  
16  
17 *Disabil Rehabil* 2016:1-11doi:10.1080/09638288.2016.1258437.  
18  
19 23. Alt Murphy M, Persson HC, Danielsson A, et al. SALGOT - Stroke Arm Longitudinal study at the  
20  
21 University of Gothenburg, prospective cohort study protocol. *BMC Neurol*  
22  
23 2011;**11**(1):56doi:10.1186/1471-2377-11-56.  
24  
25 24. Lyle RC. A performance test for assessment of upper limb function in physical rehabilitation  
26  
27 treatment and research. *Int J Rehabil Res* 1981;**4**(4):483-92  
28  
29 25. von Elm E, Altman DG, Egger M, et al. The Strengthening the Reporting of Observational Studies  
30  
31 in Epidemiology (STROBE) statement: guidelines for reporting observational studies. *Lancet*  
32  
33 2007;**370**(9596):1453-7doi:10.1016/S0140-6736(07)61602-X.  
34  
35 26. Asplund K, Hulter Asberg K, Appelros P, et al. The Riks-Stroke story: building a sustainable  
36  
37 national register for quality assessment of stroke care. *International journal of stroke :*  
38  
39 official journal of the International Stroke Society 2011;**6**(2):99-108doi:10.1111/j.1747-  
40  
41 4949.2010.00557.x.  
42  
43 27. Brott T, Adams HP, Jr., Olinger CP, et al. Measurements of acute cerebral infarction: a clinical  
44  
45 examination scale. *Stroke* 1989;**20**(7):864-70  
46  
47 28. van Swieten JC, Koudstaal PJ, Visser MC, et al. Interobserver agreement for the assessment of  
48  
49 handicap in stroke patients. *Stroke; a journal of cerebral circulation* 1988;**19**(5):604-7  
50  
51 29. Grimby G. Physical activity and muscle training in the elderly. *Acta Med Scand Suppl*  
52  
53 1986;**711**:233-7  
54  
55  
56  
57  
58  
59  
60

- 1  
2  
3 30. Mattiasson-Nilo I, Sonn U, Johannesson K, et al. Domestic activities and walking in the elderly:  
4  
5 evaluation from a 30-hour heart rate recording. *Aging (Milano)* 1990;**2**(2):191-8  
6  
7 31. Ladenvall P, Persson CU, Mandalenakis Z, et al. Low aerobic capacity in middle-aged men  
8  
9 associated with increased mortality rates during 45 years of follow-up. *Eur J Prev Cardiol*  
10  
11 2016;**23**(14):1557-64doi:10.1177/2047487316655466.  
12  
13 32. Takagi D, Nishida Y, Fujita D. Age-associated changes in the level of physical activity in elderly  
14  
15 adults. *J Phys Ther Sci* 2015;**27**(12):3685-7doi:10.1589/jpts.27.3685.  
16  
17 33. Kunkel D, Fitton C, Burnett M, et al. Physical inactivity post-stroke: a 3-year longitudinal study.  
18  
19 *Disabil Rehabil* 2015;**37**(4):304-10doi:10.3109/09638288.2014.918190.  
20  
21 34. Lindahl M, Hansen L, Pedersen A, et al. Self-reported physical activity after ischemic stroke  
22  
23 correlates with physical capacity. *Adv Physiother* 2008;**10**(4):188-94  
24  
25 35. Buchman AS, Wilson RS, Yu L, et al. Total daily activity declines more rapidly with increasing age  
26  
27 in older adults. *Arch Gerontol Geriatr* 2014;**58**(1):74-9doi:10.1016/j.archger.2013.08.001.  
28  
29 36. Knoflach M, Matosevic B, Rucker M, et al. Functional recovery after ischemic stroke--a matter of  
30  
31 age: data from the Austrian Stroke Unit Registry. *Neurology* 2012;**78**(4):279-  
32  
33 85doi:10.1212/WNL.0b013e31824367ab.  
34  
35 37. Hagstromer M, Oja P, Sjostrom M. Physical activity and inactivity in an adult population assessed  
36  
37 by accelerometry. *Med Sci Sports Exerc* 2007;**39**(9):1502-  
38  
39 8doi:10.1249/mss.0b013e3180a76de5.  
40  
41 38. Grimby G, Borjesson M, Jonsdottir IH, et al. The "Saltin-Grimby Physical Activity Level Scale" and  
42  
43 its application to health research. *Scand J Med Sci Sports* 2015;**25 Suppl 4**:119-  
44  
45 25doi:10.1111/sms.12611.  
46  
47 39. Thune I, Njolstad I, Lochen ML, et al. Physical activity improves the metabolic risk profiles in men  
48  
49 and women: the Tromso Study. *Arch Intern Med* 1998;**158**(15):1633-40  
50  
51  
52  
53  
54  
55  
56  
57  
58  
59  
60



1  
2  
3 40. Alzahrani MA, Dean CM, Ada L, et al. Mood and Balance are Associated with Free-Living Physical  
4  
5 Activity of People after Stroke Residing in the community. Stroke Res Treat  
6  
7 2012;**2012**:470648doi:10.1155/2012/470648.  
8  
9  
10  
11  
12  
13

## 14 **Figure legends**

15  
16  
17  
18 *Fig 1. Flowchart for inclusion of the study participants*  
19

20  
21 *Fig 2. Predicted probabilities of being mostly inactive one year after stroke. The predicted*  
22 *probability increases with higher age, higher degree of functional dependency and being*  
23 *physically inactive pre-stroke.*  
24  
25  
26

27  
28 *Fig.3 Predicted probability for having low PA one year after stroke. The predicted probability*  
29 *increases with higher age and higher degree of functional dependency.*  
30  
31  
32  
33  
34  
35  
36  
37  
38  
39  
40  
41  
42  
43  
44  
45  
46  
47  
48  
49  
50  
51  
52  
53  
54  
55  
56  
57  
58  
59  
60

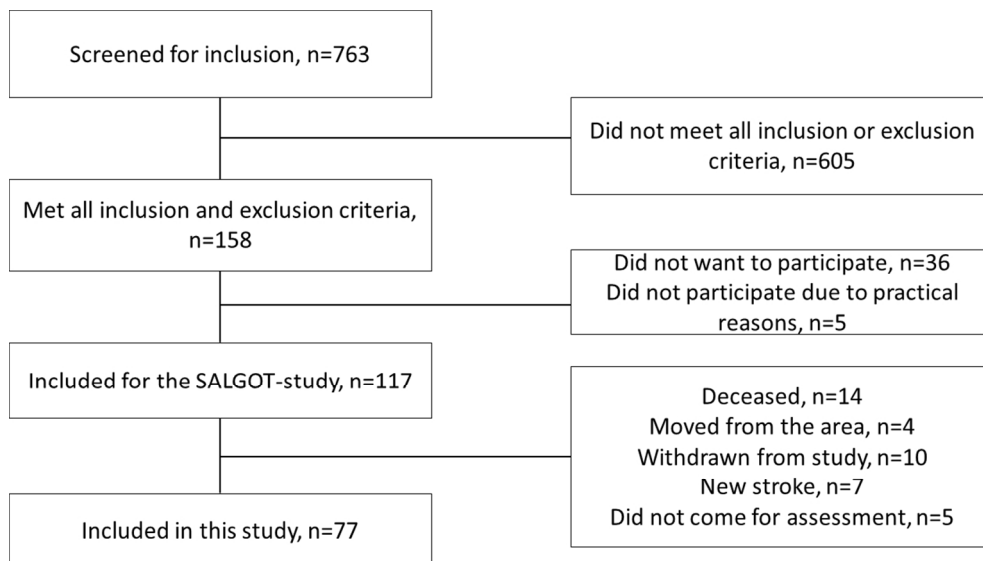

Flowchart for inclusion of the study participants

108x60mm (300 x 300 DPI)

review only

1  
2  
3  
4  
5  
6  
7  
8  
9  
10  
11  
12  
13  
14  
15  
16  
17  
18  
19  
20  
21  
22  
23  
24  
25  
26  
27  
28  
29  
30  
31  
32  
33  
34  
35  
36  
37  
38  
39  
40  
41  
42  
43  
44  
45  
46  
47  
48  
49  
50  
51  
52  
53  
54  
55  
56  
57  
58  
59  
60

1  
2  
3  
4  
5  
6  
7  
8  
9  
10  
11  
12  
13  
14  
15  
16  
17  
18  
19  
20  
21  
22  
23  
24  
25  
26  
27  
28  
29  
30  
31  
32  
33  
34  
35  
36  
37  
38  
39  
40  
41  
42  
43  
44  
45  
46  
47  
48  
49  
50  
51  
52  
53  
54  
55  
56  
57  
58  
59  
60

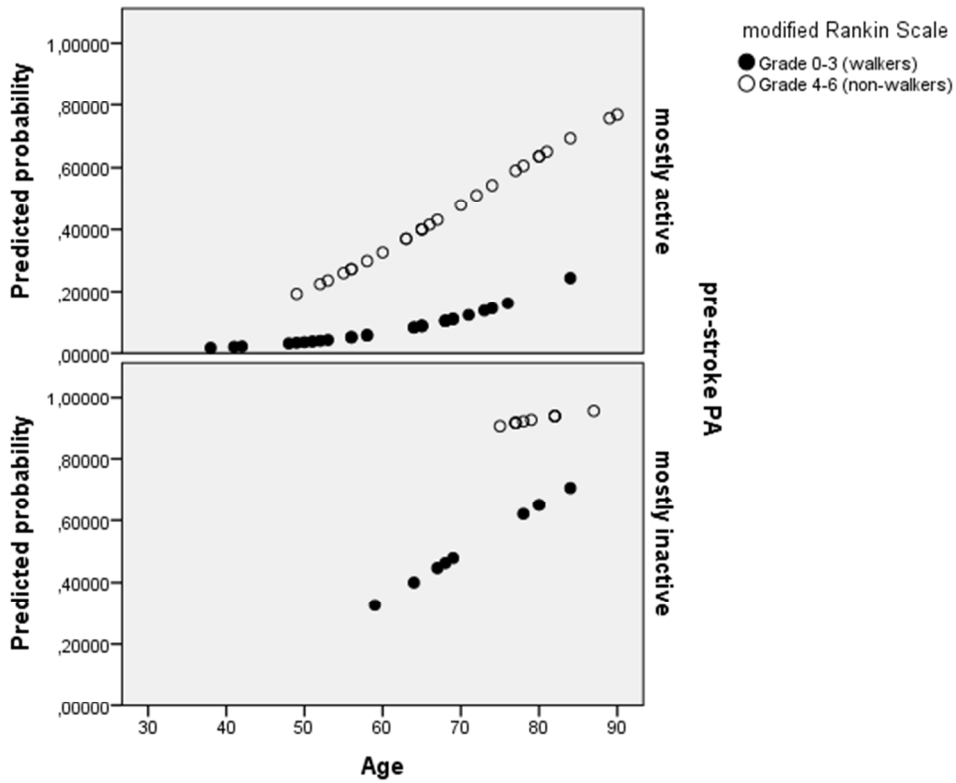

Predicted probabilities of being mostly inactive one year after stroke. The predicted probability increases with higher age, higher degree of functional dependency and being physically inactive pre-stroke.

53x42mm (300 x 300 DPI)

For peer review only

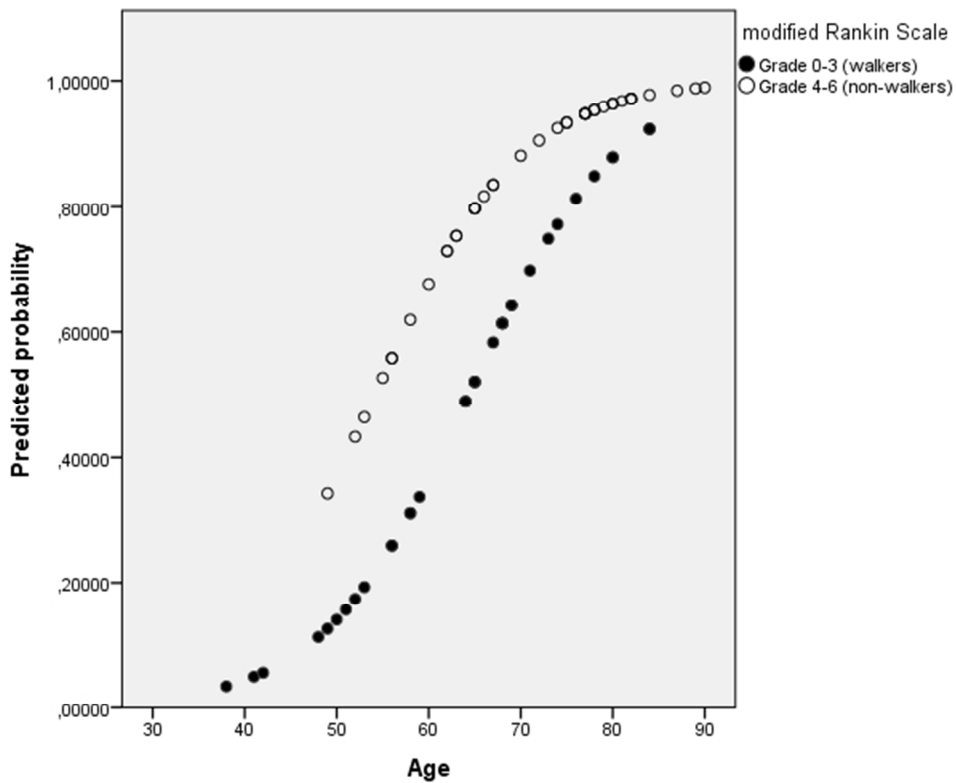

Predicted probability for having low PA one year after stroke. The predicted probability increases with higher age and higher degree of functional dependency.

53x42mm (300 x 300 DPI)

View Only

## Appendix A

### 6-level scale for physical activity

1. Hardly no physical activity
2. Mostly sitting, sometimes a walk, easy gardening or similar tasks, sometimes light household activities such as heating up food, dusting, or “clearing away”
3. Light physical exercise for about 2-4 hours a week, e.g. walks, fishing, dancing, ordinary gardening etc., including walks to and from shops. Main responsibility for light domestic work such as cooking, dusting, “clearing away”, and making beds. Performs or takes part in weekly cleaning
4. Moderate exercise 1-2 hours a week, e.g. jogging, swimming, gymnastics, heavier gardening, home repair or easier physical activities more than 4 hours a week. Responsible for all domestic activities, easy as well as heavy. Weekly cleaning with vacuum cleaning, washing floors and window-cleaning
5. Moderate exercise at least 3 hours a week, e.g. tennis, swimming, jogging etc.
6. Hard or very hard exercise regularly and several times a week, during which physical exertion is great, e.g. jogging, skiing

## Appendix B

Supplementary table. Univariate logistic regression analysis between predictors and outcome variable of physical activity level one year after stroke

| Predictor variables                  | Mostly inactive<br>(grade 1-2) |               | Low PA<br>(grade 1-3) |               |
|--------------------------------------|--------------------------------|---------------|-----------------------|---------------|
|                                      | Wald                           | p-value       | Wald                  | p-value       |
| Age                                  | 14.018                         | <0.001        | 16.483                | <0.001        |
| Gender                               | 0.001                          | 0.970         | 0.518                 | 0.472         |
| Ischemic/hemorrhagic                 | 1.274                          | 0.259         | <sup>1)</sup>         | <sup>1)</sup> |
| Smoking                              | <sup>1)</sup>                  | <sup>1)</sup> | 1.083                 | 0.298         |
| Shared living                        | 1.918                          | 0.166         | 4.597                 | 0.032         |
| Treatment for high<br>blood pressure | 1.487                          | 0.223         | <sup>1)</sup>         | <sup>1)</sup> |
| NIHSS                                | 3.946                          | 0.061         | 1.588                 | 0.208         |
| ARAT                                 | 9.545                          | 0.002         | 10.023                | 0.002         |
| mRS                                  | 11.902                         | 0.001         | 9.512                 | 0.002         |
| Pre-stroke PA                        | 11.755                         | 0.001         | 6.669                 | 0.010         |

<sup>1)</sup>= not applicable due to too small subgroups for analysis.

*P-Value for significance set for 0.25*

*Abbreviations: NIHSS=National Institute of Health Stroke Scale, mRS=modified Rankin Scale, ARAT=Action Research Arm Test, PA=Physical Activity.*

## STUDY PROTOCOL

## Open Access

# SALGOT - Sroke Arm Longitudinal study at the University of Gothenburg, prospective cohort study protocol

Margit Alt Murphy\*, Hanna C Persson, Anna Danielsson, Jurgen Broeren, Åsa Lundgren-Nilsson and Katharina S Sunnerhagen

## Abstract

**Background:** Recovery patterns of upper extremity motor function have been described in several longitudinal studies, but most of these studies have had selected samples, short follow up times or insufficient outcomes on motor function. The general understanding is that improvements in upper extremity occur mainly during the first month after the stroke incident and little if any, significant recovery can be gained after 3-6 months. The purpose of this study is to describe the recovery of upper extremity function longitudinally in a non-selected sample initially admitted to a stroke unit with first ever stroke, living in Gothenburg urban area.

**Methods/Design:** A sample of 120 participants with a first-ever stroke and impaired upper extremity function will be consecutively included from an acute stroke unit and followed longitudinally for one year. Assessments are performed at eight occasions: at day 3 and 10, week 3, 4 and 6, month 3, 6 and 12 after onset of stroke. The primary clinical outcome measures are Action Research Arm Test and Fugl-Meyer Assessment for Upper Extremity. As additional measures, two new computer based objective methods with kinematic analysis of arm movements are used. The ABILHAND questionnaire of manual ability, Stroke Impact Scale, grip strength, spasticity, pain, passive range of motion and cognitive function will be assessed as well. At one year follow up, two patient reported outcomes, Impact on Participation and Autonomy and EuroQol Quality of Life Scale, will be added to cover the status of participation and aspects of health related quality of life.

**Discussion:** This study comprises a non-selected population with first ever stroke and impaired arm function. Measurements are performed both using traditional clinical assessments as well as computer based measurement systems providing objective kinematic data. The ICF classification of functioning, disability and health is used as framework for the selection of assessment measures. The study design with several repeated measurements on motor function will give us more confident information about the recovery patterns after stroke. This knowledge is essential both for optimizing rehabilitation planning as well as providing important information to the patient about the recovery perspectives.

**Trial registration:** ClinicalTrials.gov: NCT01115348

**Keywords:** stroke, upper extremity, recovery of function, kinematics, longitudinal study

\* Correspondence: [margit.alt-murphy@vgregion.se](mailto:margit.alt-murphy@vgregion.se)  
Department of Clinical Neuroscience and Rehabilitation, Institute of Neuroscience and Physiology, Sahlgrenska Academy at University of Gothenburg, Gothenburg, Sweden

## Background

Stroke is defined by the World Health Organization (WHO) as rapidly developing clinical signs of focal or global disturbance of cerebral function, with symptoms lasting more than 24 hours or leading to death and with no apparent non-vascular cause. The incidence of stroke in Sweden is 300 cases per 100 000 inhabitants in a year of whom 200 suffer a first incidence of stroke leading to a total of 18 000 new stroke victims. About 25000 - 30000 persons yearly suffer from acute stroke each year in Sweden. Of these, about 20% will die within the first month and about 1/3 of the survivors will remain significantly disabled after 6-12 months [1].

The upper extremity function is impaired after stroke in approximately 70-80% of patients in acute phase and in 40% in chronic phase [2-4]. This impairment limits the voluntary, well coordinated, and effective movements as well as a person's level of activity [5] and participation in their social and physical environment [2]. This longstanding disability might also influence the quality of life [6].

Recovery of motor skills after stroke depends both on spontaneous reparative process as well as reorganization of neural mechanisms, influenced by inputs and demands given to the motor control system. The current perspective on motor learning focuses on active task-oriented training and how feedback and other basic training principals such as regularity, intensity and specificity affects the long-term recovery [7,8]. In order to detect meaningful improvements in motor function, appropriate outcome measures should be used. Beside the requirements on reliability, validity and sensitivity, the issues of functionality and objectivity must be considered while selecting the appropriate measures. Assessment methods with continuous variables are recommended to be included into evaluation batteries since they might have higher power to detect the important improvements in motor recovery [9-11].

Improved understanding of the recovery patterns after stroke is essential for planning and execution of optimal rehabilitation. Recovery patterns of upper extremity function have been described for selected stroke populations in several longitudinal studies. The general idea is that improvements in the upper extremity occur mainly during the first month after onset of the stroke and that little, if any, significant recovery can be gained after 3-6 months [3,12-14]. Several studies, conducted in selected populations at rehabilitation facilities have shown that, in some patients, the improvements also continued for a longer time [2,4,15]. There are only a few studies with non-selected community based populations describing the recovery patterns in the upper extremity. These studies report a similar recovery pattern with little or no significant recovery beyond 2-3 months [3,16-18].

Whether this is correct is not clear for the non-selected studies, since in some reports the sample sizes were small [14,15], the follow up times were short [3,4] or the information on the motor assessments was not satisfactory [3,18].

### Kinematic measurement - drinking task

Kinematics describes movements of the body through space and time, including linear and angular displacements, velocities and accelerations, but without reference to the forces involved. Kinematic data can be achieved by optoelectronic systems where multiple high-speed cameras send out infra red light signals and detect the reflection from the markers placed on the body. Kinematic variables provide objective, precise and detailed measures of movement performance and quality.

Kinematic movement analysis has become a useful assessment tool within rehabilitation and is employed routinely for gait analyses. Few studies have used kinematic movement analysis to examine the upper extremity in a longitudinal design. In one of these studies the kinematic data was obtained from an isolated fast elbow extension [15,19] and in the other a targeting fast reaching movement [20]. In order to better understand the situation of a person with impaired upper extremity function, information is needed regarding activities of daily living. It is known that the motor activity of the upper extremity is dependent on the meaning of the task and on the shape and placement of the object [21]. Thus, it is meaningful to study natural purposeful movements with real-life objects. In an earlier study we have developed a test protocol and a program for data analyses of the kinematic variables for the activity of drinking from a glass, which has been applied in a control setting [22] and in stroke subjects [23].

### Kinematic measurement - Virtual reality test

Virtual reality (VR) can be described as the world perceived in a computer. VR systems that include a haptic device can provide tactile feedback to the user through the force feedback. If the system detects a collision between the device and virtual objects, it transmits a reaction to the user's hand, which interacts with perception of the test or training situation [24]. In the real world, objects are usually perceived in the same location whether the sense involved is vision or touch (haptic). In the virtual world, the precise co-location of haptics is technically harder to achieve, but when the co-location is accurate the realism of the manipulation is very high and the user's performance is improved [25]. The knowledge about effects of using VR in assessments and training after stroke is still limited, but sufficiently encouraging to justify additional clinical trials in this population [26-31].



## Theoretical background

WHO approved in May 2001 the model on International Classification of Functioning, Disability and Health (ICF) [32] to assess the consequences of a disorder or a disease on the individual person. The ICF model provides a multi-perspective approach to the classification of functioning and disability as an interactive and evolutionary process. In the model an individual's functions in a specific domain is an interaction or complex relationship between the health conditions (physical or mental) and contextual factors (social and physical environment as well as personal factors). The components of ICF can be used to indicate problems (e.g. impairments, activity limitations or participation restrictions summarized under the umbrella term disability) in different areas. This approach forces health professionals to look wider than the usual perspective, which has traditionally lain in the domain of body function and structures. The model boosts the traditional rehabilitation ideology where the focus has not been on the organ but on the person and thereby requiring different treatments depending on that person's goal. In order to assess the consequences of a disease we need to look at different components of the ICF.

Longitudinal studies are difficult to perform. Sweden has a unique situation since people are quite easy to trace through the civic system and moving from one region to another is not so frequent. In addition, the representativeness for the disease is good since all patients within a catchment area are usually referred to the same hospital as private alternatives are scarce and thereby the possibilities to generalize the results are good.

The purpose of this study is to describe the recovery of upper extremity function longitudinally in a non-selected sample with first ever clinical stroke admitted to a stroke unit.

The specific objectives of the present study are to:

- A. Follow recovery of upper extremity by using clinical measures of body function (motor function, spasticity), activity (use of the arm and hand) and participation (impact of limitations) after stroke
- B. Follow functional recovery by using objective, new IT technology (kinematic movement analysis and VR-test with sensory feedback) after stroke
- C. To gather the assessments of participants self-perceived upper extremity function over the first year after stroke
- D. To predict function at 12 months by analysis of data gathered at first week after onset of stroke

## Methods/Design

A sample of 120 persons with a first occurrence of stroke will be included and followed longitudinally for

one year after the stroke. The group will consist of consecutively included persons recruited from the stroke unit at Sahlgrenska University Hospital, Gothenburg, Sweden. The Stroke unit at Sahlgrenska University Hospital serves the larger Gothenburg urban area, thus all persons from this catchment area are randomly referred to the Sahlgrenska University Hospital. The project is approved by the Regional Ethical Review Board and the Helsinki declaration is followed. Written informed consent will be obtained from the participants or from their closest relative. The SALGOT study is registered on ClinicalTrials.gov (NCT01115348).

Inclusion criteria are:

- Diagnosed first ever clinical stroke, based on WHO criteria (ischemic infarct, haemorrhagic and subarachnoidal bleeding)
- Impaired upper extremity function. This is defined in two steps. On the first or second day after stroke onset the upper extremity function is assessed with Modified Motor Assessment Scale (M-MAS UAS-95) [33] (this is performed as standard clinical assessment by physiotherapists working at the stroke unit). All persons, who do not obtain the maximum score on the subtests of arm function, hand movements and fine motor function due to hemiparesis, will be informed about the study and retested at day three after stroke with Action Research Arm Test (ARAT) [34]. All persons who do not achieve the maximum score for ARAT (score 57) will be included.
- Admitted to the stroke unit within three days after stroke onset
- Living in the Gothenburg urban area (maximal 35 km from the Sahlgrenska University Hospital)
- Age 18 or older

Exclusion criteria are:

- Upper-extremity injury or condition prior to the stroke that limits the functional use of the affected arm and hand
- Severe multi-impairment or diminished physical condition before the stroke that will affect the arm function
- Life expectancy less than 12 months due to other illness (cardiac disease, malignancy) or severity of stroke injury
- Not Swedish speaking prior to the stroke incident

## Design and procedure

This study will evaluate the recovery patterns after first ever stroke without any intervention except standard rehabilitation planning and procedures. All included

participants will be assessed eight times during the first year after stroke. Assessments are performed at day 3 and 10, week 3, 4 and 6, month 3, 6 and 12 after onset of stroke. Tests are administered in block randomized manner in order to minimize the systematic testing bias. The test order and the reason for missed or unsuccessful test results will be recorded in a protocol. All tests are performed by three experienced physical therapists, undergoing a training period together for the assessment battery prior to the study start. ICF classification of functioning, disability and health is used as framework for the selection of assessment measures (Figure 1).

### Outcome measures

Demographic data will be collected during the first assessment. Stroke subtype will be confirmed by CT and/or MRI scans. Ischemic strokes will be classified for subtype and site for lesion by using TOAST [35] and Bamford classifications [36]. Treatments of thrombolysis or thromboectomy will be registered. Additional data will be extracted from the national quality register for stroke - Swedish Stroke Register [1]. The Self-Administered Comorbidity Questionnaire (SCQ) will be used to collect additional information on relevant medical conditions and problems [37]. Cognitive function is evaluated at every test occasion using Barrow Neurological Institute Screen for Higher Cerebral Functions (BNIS) [38]. The three prescreen items scoring the level of consciousness/alertness, cooperation and basic communication skills and the item of

auditory comprehension will be assessed. The level of physical activity is recorded by a 6-grade scale of Physical Activity Classification [39,40]. This instrument is valid, short and suitable for longitudinal studies and takes account the activity level both during domestic and fitness activities [40]. Exact time points for all assessments are listed in Table 1.

### Clinical outcome measures of function and activity

The upper extremity motor function will be assessed using the Fugl-Meyer Assessment for Upper Extremity (FMA-UE) [41], and a maximum score of 66 corresponds to normal motor function. The psychometric properties of Fugl-Meyer Assessment have shown excellent reliability and validity [41-43]. The non-motor domains of FMA-UE, sensation, passive range of motion and pain during passive joint motions will be completed as well.

Action research Arm Test (ARAT) is a performance test for upper extremity function and dexterity [44]. The ARAT uses ordinal scoring on 19 items divided into four hierarchical subtests: grasp, grip, pinch and gross movement. Each upper extremity is evaluated individually and the test can be completed in 5-15 minutes [44,45]. ARAT has been shown to have good validity, sensitivity to spontaneous and therapy-related gains after stroke both in acute and chronic phase [44,46]. The ARAT has shown good responsiveness [47] and excellent inter-rater and intra-rater reliability [44,48].

Spasticity will be assessed with the Modified Ashworth Scale (MAS). The muscle groups of elbow flexors and

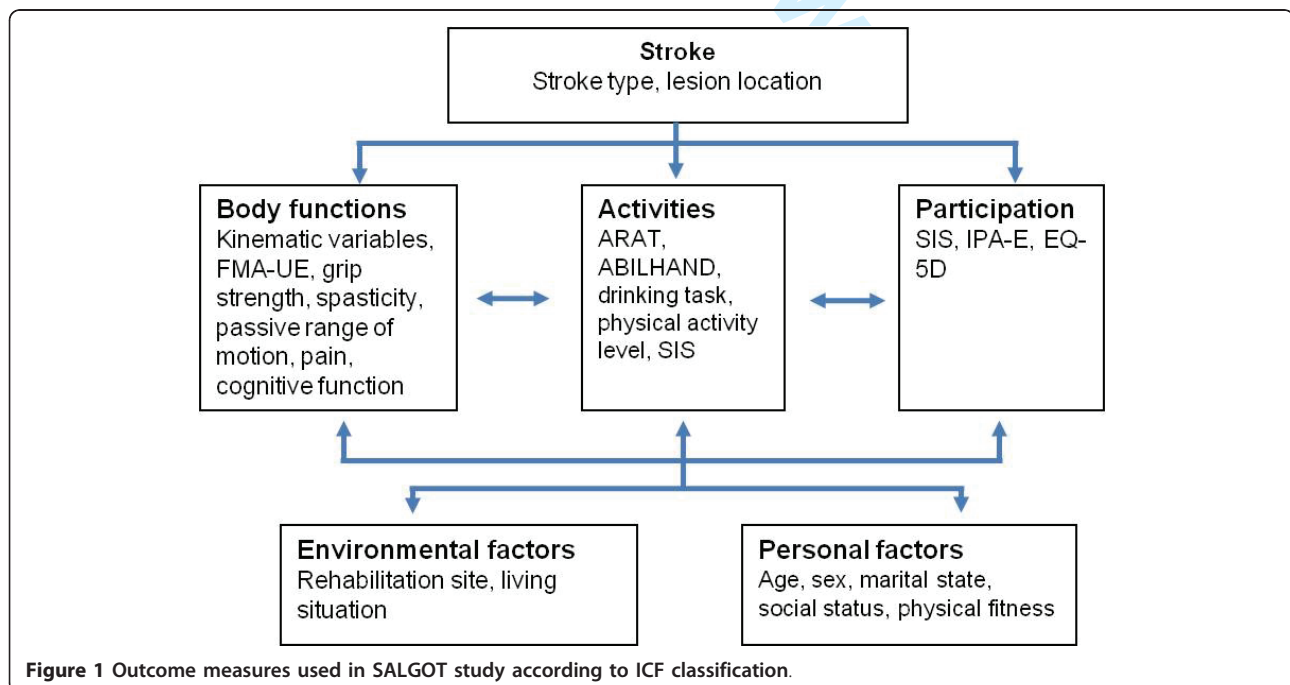

**Table 1 Scheme over the assessments and time-points for test occasions**

| Assessments               | Test occasion (d=day, w=week, m=month) |    |     |    |    |    |    |    |     |
|---------------------------|----------------------------------------|----|-----|----|----|----|----|----|-----|
|                           | d1                                     | d3 | d10 | w3 | w4 | w6 | m3 | m6 | m12 |
| M-MAS UAS -95             | x                                      |    |     |    |    |    |    |    |     |
| NIHSS                     | x                                      |    |     |    |    |    |    |    |     |
| BNIS                      |                                        | x  | x   | x  | x  | x  | x  | x  | x   |
| Physical activity scale   |                                        | x  |     |    |    |    |    | x  | x   |
| FMA-UE                    |                                        | x  | x   | x  | x  | x  | x  | x  | x   |
| Action Research Arm Test  |                                        | x  | x   | x  | x  | x  | x  | x  | x   |
| ABILHAND                  |                                        | x  | x   | x  | x  | x  | x  | x  | x   |
| Grip strength             |                                        | x  | x   | x  | x  | x  | x  | x  | x   |
| Modified Ashworth Scale   |                                        | x  | x   | x  | x  | x  | x  | x  | x   |
| Kinematic - drinking task |                                        | x  | x   |    | x  |    | x  | x  | x   |
| Kinematic - VR-test       |                                        | x  | x   | x  | x  | x  | x  | x  | x   |
| Stroke Impact Scale       |                                        |    | x   |    | x  |    | x  | x  | x   |
| IPA-E                     |                                        |    |     |    |    |    |    |    | x   |
| EQ-5D                     |                                        |    |     |    |    |    |    |    | x   |

extensors, wrist flexors and extensors will be evaluated. The MAS is the best alternative for spasticity assessment in clinical setting available and has been shown to have fair reliability for these joints [49,50].

The grip strength will be measured using the Jamar Hand Dynamometer. Standardized positioning and instructions are followed and the average of three trials is used as test outcome [51]. Reliability for the grip strength measure is very high [52].

#### Kinematic measurements - objective outcomes of performance

Three-dimensional motion analysis of upper extremity during drinking task will be performed with a 5-camera optoelectronic ProReflex Motion Capture System (MCU240 Hz, Qualisys AB, Sweden). The tracing of the three-dimensional coordinate positions of the markers is completed automatically by Qualisys Track Manager, 2.0. The capture data is then transferred to MATLAB (The MathWorks Inc) software for custom-made analysis. A standardized drinking task with stable test-retest reliability will be used [53]. The participant is sitting in front of the table with tested hand resting on the edge of the table (Figure 2). A drinking glass, filled with 100 mL water is placed 30 cm from the table edge in the midline of the body. The drinking task includes reaching, grasping, and lifting the glass from the table and taking a drink (one sip); placing the glass back on the table behind a marked line; and returning to the initial

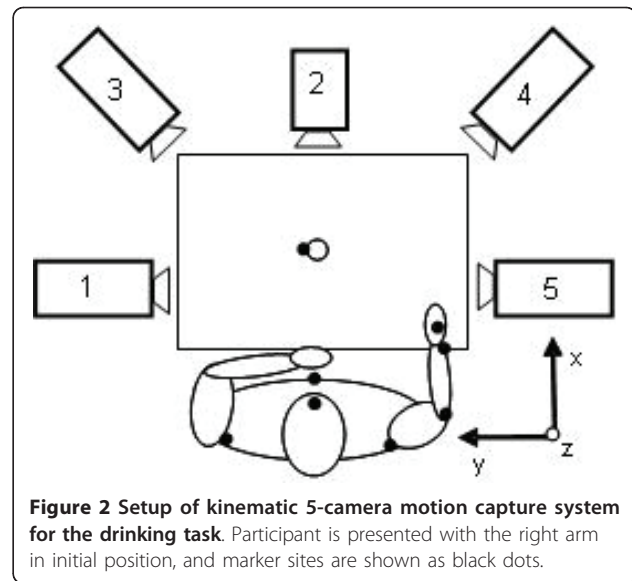

**Figure 2 Setup of kinematic 5-camera motion capture system for the drinking task.** Participant is presented with the right arm in initial position, and marker sites are shown as black dots.

position. Participants are instructed to sit against the chair back during the whole task, but the sitting position is not restrained, and compensatory movements are allowed. All participants perform the drinking task at a comfortable self-paced speed, starting with their non-affected arm, after practicing a few times. The mean of the three middle trials of total five will be used for statistical calculations. A total of 9 spherical 12-mm retro-reflective markers are placed on the third metacarpophalangeal joint of hand, styloid process of ulna on wrist, lateral epicondyle of elbow, middle part of acromion on right and left shoulder, upper part of sternum, forehead and on the upper and lower edge of the glass. The procedure has been described in more detail previously [53,54].

In the VR test [55], the participant reaches into a virtual space and interacts with 3D objects. The VR equipment consists of a semi-immersive workbench with haptic device and stereoscopic glasses. In our set-up, the haptic equipment looks like a stylus shaped instrument attached to a lever system and it is freely movable in all directions (Figure 3). During the test, the position of the stylus is tracked, and resistive force is applied to the stylus when it comes into contact with the virtual object, providing force feedback. In addition to the visual perception, the haptic device creates an illusion of manipulation and sensation of the virtual objects. The participant moves the stylus in a realistic environment, experiencing the sense of moving inside the computer screen. The precise co-location of haptics is achieved by projecting the virtual image onto the same location as the user's hand through the mirror setup. The VR-test, developed by our group, is a precise quantitative kinematic measurement tool for arm and hand movements



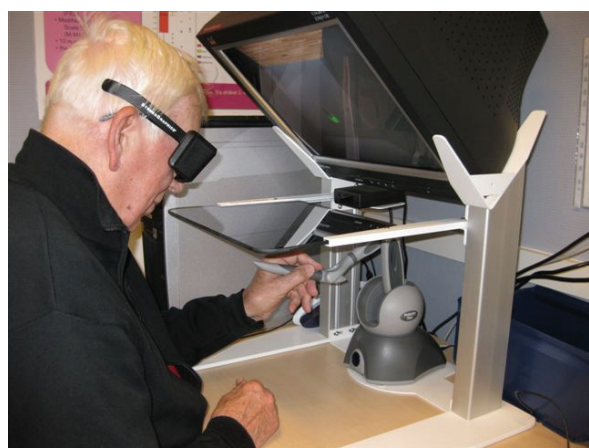

**Figure 3** Participant is performing the VR-test. The VR equipment consists of a semi-immersive workbench with haptic device and stereoscopic glasses.

and has been shown to have a good test retest reliability [31,56,57]. During the test the participant has to move the haptic stylus to 32 different targets in the virtual environment (VE) generated by the computer. The targets appear one after the other and disappear when touched. Each target consists of a whole circle (diameter 3.0 cm viewing angle). The 32 target placements in the VE are random to the subject but are actually set according to a pre-set kinematic scheme for evaluation purposes. In each test occasion the participant have one or two training trails before the measurements starts. Both dominant and non-dominant hand is measured, starting with the non-dominant hand. The participant performs the test as fast as possible.

#### Self-perceived outcomes

ABILHAND [58,59] is a questionnaire aiming to assess manual ability in persons with chronic stroke. It is interview based and focused on perceived difficulties in everyday activities. A Swedish version has been validated [60]. ABILHAND is a Rasch-based assessment; it is unidimensional and can be used as linear measure [58,59].

Stroke Impact Scale (SIS) [61] is a questionnaire on different aspects of the stroke recovery where the person replies on their perception regarding their life after the stroke. The 59 questions are divided into 8 domains; strength, memory, emotion, communication, activities of daily living, mobility, hand function and social participation. Items within the domain are ordered hierarchically based on clinical perspective and Rasch analysis [62]. Only the first four sections are used for the test occasion at day 10.

Impact on Participation and Autonomy (IPA-E) is a generic outcome measure for adults with chronic conditions where the person estimates perceived limitations

in participation and autonomy related to dependency in the current living surrounding [63-65]. The subscales include autonomy indoors, family role, autonomy outdoors, social life and relationships, work and education. Additionally, IPA-E identifies the extent to which limitations in life are experienced as problematic in areas of mobility, self care, activities, economy issues, social life, work and education. IPA-E is valid, reliable and sensitive to change after stroke [63-65].

EuroQol Quality of Life Scale (EQ-5D) will be used to measure the health status related to the quality of life. It is a widely used generic measure and includes five dimensions: mobility, self-care, usual activities, pain/discomfort and anxiety/depression [66,67].

#### Data analysis

The kinematic data in the drinking task is filtered with a 6-Hz second-order Butterworth filter, resulting in zero-phase distortion and fourth-order filtering. The drinking task is broken down into five logical phases: reaching for the glass, forward transport of the glass to the mouth, drinking, back transport of the glass to the table, and returning the hand to the initial position. The selection of kinematic variables and data analysis calculations will be based on our earlier studies [53,54]. Movement onset is defined as the time when the tangential velocity of the hand marker exceeds 2% of the maximum velocity in the reaching phase. Movement offset is detected when the velocity of the hand is less than 2% of the maximum velocity in the returning phase. Start of forward transport phase is defined as the time when the tangential velocity of the glass exceeds 15 mm/s. The drinking phase is identified by a 15% increase or decrease of the steady-state distance between the face and glass marker. The start of the returning phase is defined as the time when the tangential velocity of the glass is less than 10 mm/s. Movement times are calculated for the whole movement and separately for each phase. Peak tangential velocity and angular velocity of the elbow joint are computed for the reaching phase. Smoothness of movement is quantified by computing the number of movement units during the reaching and forward transport phases [53]. Angular joint motions are computed from the 3D position data for elbow flexion/extension, shoulder flexion/extension in the sagittal plane, and abduction/adduction in the frontal plane [53]. Compensatory trunk movement is computed for the entire drinking task as the maximal displacement of the thorax marker from the initial position [53]. Inter-joint coordination between the shoulder and elbow joint angles for reaching phase is computed using cross-correlation analysis of zero time lag [53].

In the VR-test hand position data (haptic stylus endpoint) will be gathered. The position of the stylus is

tracked and resistive force is applied to it when it comes into contact with the virtual model, providing force feedback. All measurements generate time-stamped motion data (x, y, z) at 1000 Hz. Different parameters such as reaction- and movement time, velocity, acceleration and deceleration times are calculated. To obtain the movement quality of the hand trajectory, a hand path ratio, corresponding to the length of the pathway is calculated. The selection of kinematic variables and data analysis calculations will be based on our earlier study [30].

The raw scores from the ABILHAND questionnaire are analyzed using a Rasch analysis computer program and expressed as logistically transformed probability measures, logits [68]. In the Rasch model the raw scores are used to estimate the linear ability for each subject and linear difficulty for each item of measurement around a unidimensional continuum. Thus, the Rasch model converts the ordinal score of subject's manual ability into an equal interval linear measure.

#### Group size/power analysis

Prior longitudinal studies stroke cohorts at Sahlgrenska University Hospital have had a dropout rate of 30%. With a power (1- $\beta$ ) at 0.8 and a significance level ( $\alpha$ ) at 0.05, we need a sample of 88 patients (two-sided test) to determine a medium effect of 6 points change (10%) on ARAT. Therefore, we aim to include 120 persons.

#### Discussion

The SALGOT study is a longitudinal prospective study with a non-selected sample from Gothenburg urban area. A sample of 120 persons with first ever clinical stroke admitted to a stroke unit will be consecutively recruited from Sahlgrenska University Hospital. The study is non-interventional and the main goal is to describe the recovery of upper extremity function after first ever clinical stroke and to follow the improvements and consequences of stroke during the first year in these persons life. Measurements are performed both using traditional clinical assessments as well as computer based measurement systems that provide objective kinematic data. The person's perspective of recovery is captured both with stroke specific as well as generic self-perceived outcome measures.

In this study, the participants are assessed at eight occasions during the first year after stroke. This design gives an opportunity to study which persons will recover, when and in which areas the recovery occurs. From earlier studies it is known that the improvement of function is mostly gained during the first months after stroke. But the majority of these reports have been conducted on selected populations and in many studies the selection of outcome measures on motor function has not been sufficient. Additionally, new technologies

obtaining objective kinematic measures on motor function and performance have been scarcely used in longitudinal studies.

The gained knowledge of recovery patterns is necessary both for the healthcare system and for the individual who has suffered a stroke. Since the rehabilitation resources are limited, there is a need to know the optimal time point for interventions and have guidelines for rehabilitation planning. The more detailed information about the recovery patterns of upper extremity is needed in order to offer individualized assessment and treatment, to inform the patient sufficiently about the recovery perspectives and to enhance the patient's motivation for the rehabilitation period.

#### Abbreviations

ARAT: Action research Arm Test; BNIS: Barrow Neurological Institute Screen for Higher Cerebral Functions; EQ-5D: EuroQol Quality of Life Scale; FMA-UE: Fugl-Meyer Assessment for Upper Extremity; IPA-E: Impact on Participation and Autonomy; M-MAS UAS-95: Modified Motor Assessment Scale accordingly Uppsala Akademiska Sjukhus 95; NIHSS: National Institutes of Health Stroke Scale; SIS: Stroke Impact Scale; TOAST: Trail of Org 10172 in Acute Treatment; VR: Virtual reality; VE: Virtual Environment.

#### Acknowledgements and Funding

This project has been funded in part by the Local Research and Development Board for Gothenburg and Södra Bohuslän, the Regional Research and Development Board for Västra Götaland, the Norrbacka-Eugenia Foundation, Promobilia, the Hjalmar Svensson's Research Foundation, Greta and Einar Askers Foundation, the Foundation of the Swedish National Stroke Association, Rune and Ulla Amlövs Foundation and Inger Bendix Foundation for Medical Research.

#### Authors' contributions

MAM and HCP participated in the conception and design, planning, managing the process and are responsible for day-to-day management of the study. KSS initiated the study, participated in the conception and design, managed the process and drafted the initial manuscript. All authors contributed to the study planning, drafting the manuscript and have approved the final manuscript.

#### Competing interests

The authors declare no competing interests.

Received: 21 March 2011 Accepted: 25 May 2011

Published: 25 May 2011

#### References

1. Riks-Stroke. Årsrapport 2009. The Swedish Stroke register. [<http://www.riks-stroke.org/content/analyser/Rapport09.pdf>], [cited 2011-01-26].
2. Broeks JG, Lankhorst GJ, Rumping K, Prevo AJ: **The long-term outcome of arm function after stroke: results of a follow-up study.** *Disabil Rehabil* 1999, **21(8)**:357-364.
3. Nakayama H, Jorgensen HS, Raaschou HO, Olsen TS: **Recovery of upper extremity function in stroke patients: the Copenhagen Stroke Study.** *Arch Phys Med Rehabil* 1994, **75(4)**:394-398.
4. Parker VM, Wade DT, Langton Hower R: **Loss of arm function after stroke: measurement, frequency, and recovery.** *Int Rehabil Med* 1986, **8(2)**:69-73.
5. Feys HM, De Weerd WJ, Selz BE, Cox Steck GA, Spichiger R, Vereeck LE, Putman KD, Van Hoydonck GA: **Effect of a therapeutic intervention for the hemiplegic upper limb in the acute phase after stroke: a single-blind, randomized, controlled multicenter trial.** *Stroke* 1998, **29(4)**:785-792.
6. Nichols-Larsen DS, Clark PC, Zeringue A, Greenspan A, Blanton S: **Factors influencing stroke survivors' quality of life during subacute recovery.** *Stroke* 2005, **36(7)**:1480-1484.

7. Carr J, Shepherd RB: **Neurological rehabilitation, optimizing motor performance.** Oxford: Butterworth, Heineman; 1998.
8. Kwakkel G, Wagenaar RC, Twisk JW, Lankhorst GJ, Koetsier JC: **Intensity of leg and arm training after primary middle-cerebral-artery stroke: a randomised trial.** *Lancet* 1999, **354**(9174):191-196.
9. Williams BK, Galea MP, Winter AT: **What is the functional outcome for the upper limb after stroke?** *Aust J Physiother* 2001, **47**(1):19-27.
10. Kwakkel G, Kollen B, Lindeman E: **Understanding the pattern of functional recovery after stroke: facts and theories.** *Restor Neural Neurosci* 2004, **22**(3-5):281-299.
11. Dobkin BH: **Confounders in rehabilitation trials of task-oriented training: lessons from the designs of the EXCITE and SCILT multicenter trials.** *Neurorehabil Neural Repair* 2007, **21**(1):3-13.
12. Hendricks HT, van Limbeek J, Geurts AC, Zwarts MJ: **Motor recovery after stroke: a systematic review of the literature.** *Arch Phys Med Rehabil* 2002, **83**(11):1629-1637.
13. Katrak P, Bowring G, Conroy P, Chilvers M, Poulos R, McNeil D: **Predicting upper limb recovery after stroke: the place of early shoulder and hand movement.** *Arch Phys Med Rehabil* 1998, **79**(7):758-761.
14. Verheyden G, Nieuwboer A, De Wit L, Thijs V, Dobbelaere J, Devos H, Severijns D, Vanbeveren S, De Weerd W: **Time course of trunk, arm, leg, and functional recovery after ischemic stroke.** *Neurorehabil Neural Repair* 2008, **22**(2):173-179.
15. Mirbagheri MM, Rymer WZ: **Time-course of changes in arm impairment after stroke: variables predicting motor recovery over 12 months.** *Arch Phys Med Rehabil* 2008, **89**(8):1507-1513.
16. Duncan PW, Goldstein LB, Matchar D, Divine GW, Feussner J: **Measurement of motor recovery after stroke. Outcome assessment and sample size requirements.** *Stroke* 1992, **23**(8):1084-1089.
17. Welmer AK, Holmqvist LV, Sommerfeld DK: **Limited fine hand use after stroke and its association with other disabilities.** *J Rehabil Med* 2008, **40**(8):603-608.
18. Lawrence ES, Coshall C, Dundas R, Stewart J, Rudd AG, Howard R, Wolfe CD: **Estimates of the prevalence of acute stroke impairments and disability in a multiethnic population.** *Stroke* 2001, **32**(6):1279-1284.
19. Mirbagheri MM, Tsao CC, Rymer WZ: **Changes of elbow kinematics and kinetics during 1 year after stroke.** *Muscle Nerve* 2008, **37**(3):387-395.
20. Wagner JM, Lang CE, Sahrman SA, Edwards DF, Dromerick AW: **Sensorimotor impairments and reaching performance in subjects with poststroke hemiparesis during the first few months of recovery.** *Phys Ther* 2007, **87**(6):751-765.
21. Trombly CA, Wu CY: **Effect of rehabilitation tasks on organization of movement after stroke.** *Am J Occup Ther* 1999, **53**(4):333-344.
22. Murphy MA, Sunnerhagen KS, Johnels B, Willen C: **Three-dimensional kinematic motion analysis of a daily activity drinking from a glass: a pilot study.** *J Neuroengineering Rehabil* 2006, **3**:18.
23. Murphy MA, Willén Carin, Sunnerhagen SKatharina: **Kinematic Variables Quantifying Upper-Extremity Performance After Stroke During Reaching and Drinking From a Glass.** *Neurorehabilitation and Neural Repair* 2010, **1**-11.
24. Crosbie JH, Lennon S, McNeill MD, McDonough SM: **Virtual reality in the rehabilitation of the upper limb after stroke: the user's perspective.** *Cyberpsychol Behav* 2006, **9**(2):137-141.
25. Swapp D, Pawar V, Loscos C: **Interaction with co-located haptic feedback in virtual reality.** *Virtual Reality* 2006, **10**(1):24-30.
26. Henderson A, Korner-Bitensky N, Levin M: **Virtual reality in stroke rehabilitation: a systematic review of its effectiveness for upper limb motor recovery.** *Top Stroke Rehabil* 2007, **14**(2):52-61.
27. Boian R, Sharma A, Han C, Merians A, Burdea G, Adamovich S, Recce M, Tremaine M, Poizner H: **Virtual reality-based post-stroke hand rehabilitation.** *Stud Health Technol Inform* 2002, **85**:64-70.
28. Viau A, Feldman AG, McFadyen BJ, Levin MF: **Reaching in reality and virtual reality: a comparison of movement kinematics in healthy subjects and in adults with hemiparesis.** *J Neuroeng Rehabil* 2004, **1**(1):11.
29. Broeren J, Claesson L, Goude D, Rydmark M, Sunnerhagen KS: **Virtual rehabilitation in an activity centre for community-dwelling persons with stroke. The possibilities of 3-dimensional computer games.** *Cerebrovasc Dis* 2008, **26**(3):289-296.
30. Broeren J, Rydmark M, Bjorkdahl A, Sunnerhagen KS: **Assessment and training in a 3-dimensional virtual environment with haptics: a report on 5 cases of motor rehabilitation in the chronic stage after stroke.** *Neurorehabil Neural Repair* 2007, **21**(2):180-189.
31. Broeren J, Sunnerhagen KS, Rydmark M: **A kinematic analysis of a haptic handheld stylus in a virtual environment: a study in healthy subjects.** *J Neuroeng Rehabil* 2007, **4**:13.
32. WHO: **International classification of functioning, disability and health: ICF.** Geneva: WHO Library Cataloguing-in-Publication Data; 2001.
33. Barkeluis K, Johansson A, Korm K, Lindmark B: **Reliabilitets- och validitetsprövning av Modifierad Motor Assessment Scale enligt Uppsala Akademiska Sjukhus -95.** *Nordisk Fysioterapi* 1997, **29**:161-165.
34. Lyle RC: **A performance test for assessment of upper limb function in physical rehabilitation treatment and research.** *Int J Rehabil Res* 1981, **4**(4):483-492.
35. Adams HP Jr, Bendixen BH, Kappelle LJ, Biller J, Love BB, Gordon DL, Marsh EE: **Classification of subtype of acute ischemic stroke. Definitions for use in a multicenter clinical trial. TOAST. Trial of Org 10172 in Acute Stroke Treatment.** *Stroke* 1993, **24**(1):35-41.
36. Bamford J, Sandercock P, Dennis M, Burn J, Warlow C: **Classification and natural history of clinically identifiable subtypes of cerebral infarction.** *Lancet* 1991, **337**(8756):1521-1526.
37. Sangha O, Stucki G, Liang MH, Fossel AH, Katz JN: **The Self-Administered Comorbidity Questionnaire: a new method to assess comorbidity for clinical and health services research.** *Arthritis Rheum* 2003, **49**(2):156-163.
38. Denvall V, Elmstahl S, Prigatano GP: **Replication and construct validation of the Barrow Neurological Institute Screen for Higher Cerebral Function with a Swedish population.** *J Rehabil Med* 2002, **34**(4):153-157.
39. Grimby G: **Physical activity and muscle training in the elderly.** *Acta Med Scand Suppl* 1986, **711**:233-237.
40. Mattiasson-Nilo I, Sonn U, Johannesson K, Gosman-Hedstrom G, Persson GB, Grimby G: **Domestic activities and walking in the elderly: evaluation from a 30-hour heart rate recording.** *Aging (Milano)* 1990, **2**(2):191-198.
41. Fugl-Meyer AR, Jaasko L, Leyman I, Olsson S, Steglind S: **The post-stroke hemiplegic patient. 1. a method for evaluation of physical performance.** *Scand J Rehabil Med* 1975, **7**(1):13-31.
42. Duncan PW, Propst M, Nelson SG: **Reliability of the Fugl-Meyer assessment of sensorimotor recovery following cerebrovascular accident.** *Phys Ther* 1983, **63**(10):1606-1610.
43. van Wijk FM, Pandyan AD, Johnson GR, Barnes MP: **Assessing motor deficits in neurological rehabilitation: patterns of instrument usage.** *Neurorehabil Neural Repair* 2001, **15**(1):23-30.
44. Lyle R: **A performance test for assessment of upper limb function in physical rehabilitation treatment and research.** *Int J Rehabil Res* 1981, **4**(4):483-492.
45. Yozbatiran N, Der-Yeghalian L, Cramer SC: **A standardized approach to performing the action research arm test.** *Neurorehabil Neural Repair* 2008, **22**(1):78-90.
46. Hsieh CL, Hsueh IP, Chiang FM, Lin PH: **Inter-rater reliability and validity of the action research arm test in stroke patients.** *Age Ageing* 1998, **27**(2):107-113.
47. van der Lee JH, Beckerman H, Lankhorst GJ, Bouter LM: **The responsiveness of the Action Research Arm test and the Fugl-Meyer Assessment scale in chronic stroke patients.** *J Rehabil Med* 2001, **33**(3):110-113.
48. Van der Lee JH, De Groot V, Beckerman H, Wagenaar RC, Lankhorst GJ, Bouter LM: **The intra- and interrater reliability of the action research arm test: a practical test of upper extremity function in patients with stroke.** *Arch Phys Med Rehabil* 2001, **82**(1):14-19.
49. Bohannon RW, Smith MB: **Interrater reliability of a modified Ashworth scale of muscle spasticity.** *Phys Ther* 1987, **67**(2):206-207.
50. Gregson JM, Leathley MJ, Moore AP, Smith TL, Sharma AK, Watkins CL: **Reliability of measurements of muscle tone and muscle power in stroke patients.** *Age Ageing* 2000, **29**(3):223-228.
51. Mathiowetz V, Kashman N, Volland G, Weber K, Dowe M, Rogers S: **Grip and pinch strength: normative data for adults.** *Arch Phys Med Rehabil* 1985, **66**(2):69-74.
52. Mathiowetz V, Weber K, Volland G, Kashman N: **Reliability and validity of grip and pinch strength evaluations.** *J Hand Surg Am* 1984, **9**(2):222-226.
53. Murphy MA, Willen C, Sunnerhagen KS: **Kinematic variables quantifying upper-extremity performance after stroke during reaching and drinking from a glass.** *Neurorehabil Neural Repair* 2011, **25**(1):71-80.



Alt Murphy *et al.* *BMC Neurology* 2011, **11**:56  
<http://www.biomedcentral.com/1471-2377/11/56>

54. Murphy MA, Sunnerhagen KS, Johnels B, Willen C: **Three-dimensional kinematic motion analysis of a daily activity drinking from a glass: a pilot study.** *J Neuroeng Rehabil* 2006, **3**:18.
55. Broeren J, Rydmark M, Sunnerhagen KS: **Virtual reality and haptics as a training device for movement rehabilitation after stroke: a single-case study.** *Archives of physical medicine and rehabilitation* 2004, **85**(8):1247-1250.
56. Broeren J, Bjorkdahl A, Pascher R, Rydmark M: **Virtual reality and haptics as an assessment device in the postacute phase after stroke.** *Cyberpsychol Behav* 2002, **5**(3):207-211.
57. Broeren J, Sunnerhagen KS, Rydmark M: **A kinematic analysis of a haptic handheld stylus in a virtual environment: a study in healthy subjects.** *J Neuroengineering Rehabil* 2007, **4**:13.
58. Penta M, Tesio L, Arnould C, Zancan A, Thonnard JL: **The ABILHAND questionnaire as a measure of manual ability in chronic stroke patients: Rasch-based validation and relationship to upper limb impairment.** *Stroke* 2001, **32**(7):1627-1634.
59. Penta M, Thonnard JL, Tesio L: **ABILHAND: a Rasch-built measure of manual ability.** *Arch Phys Med Rehabil* 1998, **79**(9):1038-1042.
60. Gustafsson S, Sunnerhagen K, Dahlin-Ivanoff S: **Occupational therapist's and patients' perception of ABILHAND, a new assessment tool for measuring manual ability.** *Scand J Occup Ther* 2004, **11**:107-117.
61. Duncan PW, Wallace D, Lai SM, Johnson D, Embretson S, Laster LJ: **The stroke impact scale version 2.0. Evaluation of reliability, validity, and sensitivity to change.** *Stroke* 1999, **30**(10):2131-2140.
62. Duncan PW, Bode RK, Min Lai S, Perera S: **Rasch analysis of a new stroke-specific outcome scale: the Stroke Impact Scale.** *Arch Phys Med Rehabil* 2003, **84**(7):950-963.
63. Cardol M, de Haan RJ, de Jong BA, van den Bos GA, de Groot IJ: **Psychometric properties of the Impact on Participation and Autonomy Questionnaire.** *Arch Phys Med Rehabil* 2001, **82**(2):210-216.
64. Cardol M, de Haan RJ, van den Bos GA, de Jong BA, de Groot IJ: **The development of a handicap assessment questionnaire: the Impact on Participation and Autonomy (IPA).** *Clin Rehabil* 1999, **13**(5):411-419.
65. Kersten P, Cardol M, George S, Ward C, Sibley A, White B: **Validity of the impact on participation and autonomy questionnaire: a comparison between two countries.** *Disabil Rehabil* 2007, **29**(19):1502-1509.
66. Rabin R, de Charro F: **EQ-5D: a measure of health status from the EuroQol Group.** *Ann Med* 2001, **33**(5):337-343.
67. Euroqol: **Euro-Qol: a new facility for the measurement of health-related quality of life.** *Health Policy* 1990, **16**:199-208.
68. Rasch G: **Probabilistic models for some intelligence and attainment tests.** Chicago: Chicago University Press; 1980.

#### Pre-publication history

The pre-publication history for this paper can be accessed here:  
<http://www.biomedcentral.com/1471-2377/11/56/prepub>

doi:10.1186/1471-2377-11-56

**Cite this article as:** Alt Murphy *et al.*: SALGOT - Stroke Arm Longitudinal study at the University of Gothenburg, prospective cohort study protocol. *BMC Neurology* 2011 **11**:56.

**Submit your next manuscript to BioMed Central and take full advantage of:**

- Convenient online submission
- Thorough peer review
- No space constraints or color figure charges
- Immediate publication on acceptance
- Inclusion in PubMed, CAS, Scopus and Google Scholar
- Research which is freely available for redistribution

Submit your manuscript at  
[www.biomedcentral.com/submit](http://www.biomedcentral.com/submit)

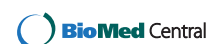

STROBE 2007 (v4) Statement—Checklist of items that should be included in reports of *cohort studies*

| Section/Topic                | Item # | Recommendation                                                                                                                                                                       | Reported on page # |
|------------------------------|--------|--------------------------------------------------------------------------------------------------------------------------------------------------------------------------------------|--------------------|
| Title and abstract           | 1      | (a) Indicate the study's design with a commonly used term in the title or the abstract                                                                                               | 1,2                |
|                              |        | (b) Provide in the abstract an informative and balanced summary of what was done and what was found                                                                                  | 2                  |
| <b>Introduction</b>          |        |                                                                                                                                                                                      |                    |
| Background/rationale         | 2      | Explain the scientific background and rationale for the investigation being reported                                                                                                 | 4                  |
| Objectives                   | 3      | State specific objectives, including any prespecified hypotheses                                                                                                                     | 4                  |
| <b>Methods</b>               |        |                                                                                                                                                                                      |                    |
| Study design                 | 4      | Present key elements of study design early in the paper                                                                                                                              | 5                  |
| Setting                      | 5      | Describe the setting, locations, and relevant dates, including periods of recruitment, exposure, follow-up, and data collection                                                      | 5                  |
| Participants                 | 6      | (a) Give the eligibility criteria, and the sources and methods of selection of participants. Describe methods of follow-up                                                           | 5                  |
|                              |        | (b) For matched studies, give matching criteria and number of exposed and unexposed                                                                                                  |                    |
| Variables                    | 7      | Clearly define all outcomes, exposures, predictors, potential confounders, and effect modifiers. Give diagnostic criteria, if applicable                                             | 6-8                |
| Data sources/<br>measurement | 8*     | For each variable of interest, give sources of data and details of methods of assessment (measurement). Describe comparability of assessment methods if there is more than one group | 7,8                |
| Bias                         | 9      | Describe any efforts to address potential sources of bias                                                                                                                            | 16, study protocol |
| Study size                   | 10     | Explain how the study size was arrived at                                                                                                                                            | 5, figure 1        |
| Quantitative variables       | 11     | Explain how quantitative variables were handled in the analyses. If applicable, describe which groupings were chosen and why                                                         | 6-8                |
| Statistical methods          | 12     | (a) Describe all statistical methods, including those used to control for confounding                                                                                                | 8,9                |
|                              |        | (b) Describe any methods used to examine subgroups and interactions                                                                                                                  | 8,9                |
|                              |        | (c) Explain how missing data were addressed                                                                                                                                          | 9                  |
|                              |        | (d) If applicable, explain how loss to follow-up was addressed                                                                                                                       | 5                  |
|                              |        | (e) Describe any sensitivity analyses                                                                                                                                                | 9                  |
| <b>Results</b>               |        |                                                                                                                                                                                      |                    |



|                          |     |                                                                                                                                                                                                              |          |
|--------------------------|-----|--------------------------------------------------------------------------------------------------------------------------------------------------------------------------------------------------------------|----------|
| Participants             | 13* | (a) Report numbers of individuals at each stage of study—eg numbers potentially eligible, examined for eligibility, confirmed eligible, included in the study, completing follow-up, and analysed            | Figure 1 |
|                          |     | (b) Give reasons for non-participation at each stage                                                                                                                                                         | Figure 1 |
|                          |     | (c) Consider use of a flow diagram                                                                                                                                                                           | Figure 1 |
| Descriptive data         | 14* | (a) Give characteristics of study participants (eg demographic, clinical, social) and information on exposures and potential confounders                                                                     | 7        |
|                          |     | (b) Indicate number of participants with missing data for each variable of interest                                                                                                                          | 7        |
|                          |     | (c) Summarise follow-up time (eg, average and total amount)                                                                                                                                                  |          |
| Outcome data             | 15* | Report numbers of outcome events or summary measures over time                                                                                                                                               | 11       |
| Main results             | 16  | (a) Give unadjusted estimates and, if applicable, confounder-adjusted estimates and their precision (eg, 95% confidence interval). Make clear which confounders were adjusted for and why they were included | 11       |
|                          |     | (b) Report category boundaries when continuous variables were categorized                                                                                                                                    | 7,8      |
|                          |     | (c) If relevant, consider translating estimates of relative risk into absolute risk for a meaningful time period                                                                                             |          |
| Other analyses           | 17  | Report other analyses done—eg analyses of subgroups and interactions, and sensitivity analyses                                                                                                               | 9-12     |
| <b>Discussion</b>        |     |                                                                                                                                                                                                              |          |
| Key results              | 18  | Summarise key results with reference to study objectives                                                                                                                                                     | 12       |
| <b>Limitations</b>       |     |                                                                                                                                                                                                              |          |
| Interpretation           | 20  | Give a cautious overall interpretation of results considering objectives, limitations, multiplicity of analyses, results from similar studies, and other relevant evidence                                   | 12-17    |
| Generalisability         | 21  | Discuss the generalisability (external validity) of the study results                                                                                                                                        | 13,16,17 |
| <b>Other information</b> |     |                                                                                                                                                                                                              |          |
| Funding                  | 22  | Give the source of funding and the role of the funders for the present study and, if applicable, for the original study on which the present article is based                                                | 18       |

\*Give information separately for cases and controls in case-control studies and, if applicable, for exposed and unexposed groups in cohort and cross-sectional studies.

**Note:** An Explanation and Elaboration article discusses each checklist item and gives methodological background and published examples of transparent reporting. The STROBE checklist is best used in conjunction with this article (freely available on the Web sites of PLoS Medicine at <http://www.plosmedicine.org/>, Annals of Internal Medicine at <http://www.annals.org/>, and Epidemiology at <http://www.epidem.com/>). Information on the STROBE Initiative is available at [www.strobe-statement.org](http://www.strobe-statement.org).

# BMJ Open

## Early prediction of physical activity level one year after stroke, a longitudinal cohort study.

|                                 |                                                                                                                                                                                                                                                                                                                   |
|---------------------------------|-------------------------------------------------------------------------------------------------------------------------------------------------------------------------------------------------------------------------------------------------------------------------------------------------------------------|
| Journal:                        | <i>BMJ Open</i>                                                                                                                                                                                                                                                                                                   |
| Manuscript ID                   | bmjopen-2017-016369.R1                                                                                                                                                                                                                                                                                            |
| Article Type:                   | Research                                                                                                                                                                                                                                                                                                          |
| Date Submitted by the Author:   | 07-Apr-2017                                                                                                                                                                                                                                                                                                       |
| Complete List of Authors:       | Olsson, Ola; Univ of Gothenburg, Inst of Neuroscience and Physiology<br>Persson, Hanna; Univ of Gothenburg, Inst of Neuroscience and Physiology<br>Alt Murphy, Margit; Univ of Gothenburg, Inst of Neuroscience and Physiology<br>Sunnerhagen, Katharina; Univ of Gothenburg, Inst of Neuroscience and Physiology |
| <b>Primary Subject Heading</b>: | Rehabilitation medicine                                                                                                                                                                                                                                                                                           |
| Secondary Subject Heading:      | Neurology                                                                                                                                                                                                                                                                                                         |
| Keywords:                       | Stroke < NEUROLOGY, Physical activity, Motor activity, Prognosis, Outcome Assessment                                                                                                                                                                                                                              |
|                                 |                                                                                                                                                                                                                                                                                                                   |

SCHOLARONE™  
Manuscripts

**TITLE PAGE**

Early prediction of physical activity level one year after stroke, a longitudinal cohort study.

Author's: Ola A Olsson MD, PT, MSc, Hanna C Persson PT, PhD, Margit Alt Murphy PT, PhD, Katharina S Sunnerhagen MD, PhD.

Author's affiliations: Department of clinical neuroscience, Institute of Neuroscience and Physiology, Sahlgrenska Academy at University of Gothenburg, Gothenburg, Sweden.

Correspondence: Katharina S Sunnerhagen, Rehabilitation medicine, Sahlgrenska university hospital, Per Dubbsgatan 14, 3<sup>rd</sup> floor, 413 45 Gothenburg, SWEDEN

+46-31-342 2803, e-mail: ks.sunnerhagen@neuro.gu.se

Key words: Stroke, Physical activity, Motor activity, Prognosis, Outcome Assessment

Number of words: 3820 including tables

## ABSTRACT

**Objective:** To investigate which variables present prior and early after stroke may have an impact on the level of physical activity one-year post stroke.

**Design:** Prospective longitudinal cohort and logistic regression analysis.

**Setting:** Stroke Unit at Sahlgrenska University Hospital, Gothenburg, Sweden.

**Participants:** 117 individuals part of the Stroke Arm Longitudinal study (SALGOT) admitted to the stroke unit during a period of 18 months (2009-2010) were consecutively recruited. The inclusion criteria were: first-time stroke, impaired upper-extremity function, admitted to the stroke unit within 3 days since onset, local residency,  $\geq 18$  years old. The exclusion criteria were: upper extremity condition or severe multi-impairment prior to stroke, short life-expectancy, non-Swedish speaking. 77 participants were followed-up at one year post stroke.

**Primary outcome:** Physical activity level one year after stroke was assessed using a 6-level Saltin-Grimby scale, which was first dichotomized into mostly inactive or mostly active, and secondly into low or moderate/high level of physical activity.

**Results:** Being mostly inactive one year after stroke could be predicted by age at stroke onset (OR 1.07, 95% CI 1.00-1.13,  $p=0.041$ ), functional dependency at discharge (OR 7.01, 95% CI 1.73-28.43,  $p=0.006$ ) and pre-stroke physical activity (OR 7.46, 95% CI 1.51-36.82,  $p=0.014$ ). Having a low level of physical activity one year after stroke could be predicted by age at stroke onset (OR 1.13, 95% CI 1.06-1.21,  $p<0.001$ ) and functional dependency at discharge (OR 3.62, 95% CI 1.09-12.04,  $p=0.036$ ).

**Conclusions:** Previous low level of physical activity, older age and functional dependency all provided value in predicting low physical activity one year after stroke. These results indicate that age and simple clinical evaluations early after stroke may be useful to help clinicians identify persons at risk of being insufficiently active after stroke. Further research is needed to clarify if these findings may apply to the large population of stroke-survivors.

**Clinical trial registration:** Clinical Trial Registration-URL: <http://www.clinicaltrials.gov>.  
Unique identifier: NCT01115348

## Strengths and limitations of the study

- Clinically important parameters prior to, and early after stroke were included
- Longitudinal consecutively recruited cohort study with one year follow-up time
- Clinically relevant dichotomization of physical activity levels produced interpretable data
- Despite relatively large cohort, the number of included predictors was limited due to small number of cases for some variables
- Persons with minor stroke showing no upper-extremity impairment early after stroke were not included

## INTRODUCTION

Low physical activity (PA) has shown to be an independent risk factor for stroke<sup>1-3</sup> and PA is a part of primary<sup>1</sup> as well as secondary prevention in most of the stroke guidelines<sup>4</sup>. The World Health Organization (WHO) has identified physical inactivity to be the fourth leading risk factor for overall global mortality<sup>5</sup>. The definition of PA according to WHO is "any bodily movement produced by skeletal muscles that requires energy expenditure – including activities undertaken while working, playing, carrying out household chores, travelling, and engaging in recreational pursuits"<sup>6</sup>. Higher PA level pre-stroke may predict a less severe stroke<sup>7 8</sup>, decrease the overall risk for death from first time stroke<sup>9</sup> and is associated with a better functional status post stroke<sup>7 10 11</sup>.

It is a complex question to answer why some people are physically active after having a stroke and others are not. PA in healthy populations has shown to be influenced by factors such as age, gender, motivation, previous PA, self-efficacy and health status<sup>12 13</sup>. Being physically active post-stroke is associated with a better quality of life and has a positive correlation to functional ability<sup>14</sup>. The PA level among stroke-survivors has been shown to be significantly lower than in a healthy reference-population<sup>15-19</sup> and correlates with walking ability, balance and physical fitness<sup>15</sup>, but cannot be explained by motor disability alone<sup>16 20</sup>. Barriers to PA reported by stroke survivors include lack of motivation, fear of falling, inaccessibility to training centers and physical impairments<sup>21 22</sup>. It is, however, not clear to what extent factors connected to the pre-stroke lifestyle and medical status may be associated with the PA level among stroke survivors. Identifying persons at risk of being inadequately active post stroke may help to target specific interventions for this group at an early stage. The purpose of this study was to investigate possible pre-stroke and early predictor variables that may impact the level of PA one year after the first time stroke.

## MATERIALS AND METHODS

### Population and data collection

This longitudinal study is a part of the Stroke Arm Longitudinal study at the University of Gothenburg (SALGOT)<sup>23</sup>, with the original purpose to describe upper extremity functioning after stroke. Over a period of eighteen months, in 2009-2010, consecutively, every person who met the criteria was included to the SALGOT-study from one of the largest out of three comprehensive Stroke Units at the Sahlgrenska University Hospital, Gothenburg. The following inclusion criteria were used: 1) first-time stroke according to International Classification of Diseases codes I61 intracerebral hemorrhage or I63 ischemic stroke; 2) impaired upper-extremity function, defined as not achieving the maximal points at the Action Research Arm Test (ARAT)<sup>24</sup> three days post-stroke; 3) admitted to the Stroke Unit within three days since stroke onset; 4) residency in the Gothenburg urban area, within 35km from the hospital; 5)  $\geq 18$  years of age. The exclusion criteria were: 1) an upper extremity injury/condition prior to stroke; 2) severe multi-impairments or diminished physical condition prior to stroke; 3) short life-expectancy; 4) non-Swedish speaking. Three experienced physiotherapists performed all clinical assessments according to a standardized protocol<sup>23</sup>. Most assessments were performed at the hospital and only at persons' home or nursing home when the participant was unable to travel. Prior power analysis for SALGOT to determine a minimum of 6 points change on ARAT (statistical power of 0.8,  $\alpha$  0.05) and considering a 30% dropout rate indicated that a sample size of 114 was needed. From a total cohort of 763 persons, 117 were included in the SALGOT study, and 77 still remained in the study at one year post stroke (fig.1). The main reason for not being assessed at one year was death (n=14) (fig 1). The study was approved by The Regional Ethical Review Board in Gothenburg (225-08). All participants or their next of kin gave written informed consent. The STROBE-guidelines for reporting observational data were followed<sup>25</sup>.

## Potential predictor variables

Potential predictors prior and close to the stroke onset, theorized to have impact on PA, were considered for model building. Prior stroke predictor variables included in the analyses were: smoking, living alone, TIA, diabetes, atrial fibrillation, treatment for high blood pressure and PA level. Other predictors included were: age, gender, type of stroke, stroke severity, upper extremity functioning three days post stroke and functional dependency at discharge (table 1).

*Table 1. Demographics, clinical characteristics and considered predictor variables.*

| Demographic and clinical characteristics n=77                |             |
|--------------------------------------------------------------|-------------|
| Age at stroke onset, mean (SD)                               | 67.2 (11.9) |
| Men, n (%)                                                   | 46 (59.7)   |
| Hemorrhagic stroke, n (%)                                    | 11 (14.3)   |
| Smoking <sup>1</sup> , n (%), n=76                           | 18 (23.7)   |
| Living alone <sup>1</sup> , n (%)                            | 31 (40.3)   |
| TIA/Amaurosis Fugax <sup>1</sup> , n (%), n=76               | 4 (5.3)     |
| Diabetes <sup>1</sup> , n (%)                                | 10 (13)     |
| Atrial Fibrillation <sup>1</sup> , n (%), n=76               | 11 (14.5)   |
| Treatment for high blood pressure <sup>1</sup> , n (%), n=76 | 26 (34.2)   |
| NIHSS at admission, median (q1-q3)                           | 7 (3-12.5)  |
| ARAT at three days, median (q1-q3), n=74                     | 7 (0-47)    |
| mRS at discharge from Stroke Unit, n (%).                    |             |
| independent walkers (grade 0-3)                              | 37 (48.1)   |
| unable to walk independently (grade 4-5)                     | 40 (51.9)   |
| Pre-stroke PA, n (%), n=73                                   |             |



|                                              |            |
|----------------------------------------------|------------|
| mostly inactive (grade 1-2)                  | 19 (26.0)  |
| low (grade 1-3)                              | 43 (58.9)  |
| Acute hospital stay, days mean (SD)          | 12.6 (7.1) |
| Discharge to post acute hospital stay, n (%) |            |
| Ordinary home                                | 27 (35)    |
| In-hospital rehabilitation unit              | 46 (60)    |
| Nursing home                                 | 4 (5)      |

<sup>†</sup> = prior to stroke.

Abbreviations: SD= Standard Deviation, y/n=yes/no, TIA=Transient Ischemic Attack, NIHSS=National Institute of Stroke Scale, ARAT=Action Research Arm Test, mRS=modified Rankin Scale, PA=Physical Activity, q1-q3=1<sup>st</sup> to 3<sup>rd</sup> quartile.

Information of history of smoking, whether the participant shared livings with another adult and medical history prior to stroke were acquired by the national Swedish Stroke Register<sup>26</sup> or medical charts. The stroke severity at admission to the hospital was assessed using the National Institute of Health Stroke Scale (NIHSS)<sup>27</sup>. The upper extremity functioning was assessed using the ARAT, which includes 19 items scored on a 4-grade ordinal scale, with a total score varying from 0-57 points, where a higher score indicates less limitation<sup>24</sup>. The functional dependency at discharge from the stroke u(mean time 13 days, SD=7,4 range 1-42) was assessed using the modified Rankin Scale (mRS)<sup>28</sup>. The mRS is an ordinal scale ranging from 0 to 6 where lower numbers indicates less dependency<sup>28</sup>. The mRS was dichotomized between the grade 3 and 4 creating one group that contained persons able to walk without assistance (no/slight/moderate disability, grades 1-3) and one group who could not (moderately severe to severe disability, grades 4-5). The self-reported PA level was recorded using a 6-level scale for classification of physical activity level (including leisure-time, occupational and household activities) (appendix A), originally developed from the 4 graded Saltin-Grimby scale<sup>29,30</sup>. The participants' PA level was scored through an interview within three days and at one year post stroke considering the PA level during the previous six

1  
2  
3 months. In the statistical analyses, the PA was dichotomized in two different ways. First, to  
4  
5 mostly inactive (grade 1-2) or mostly active (grade 3-5) and; secondly, to low (grade 1-3) or  
6  
7 moderate/high activity level (4-5). The first dichotomization was selected to match the  
8  
9 original 4-level scale based upon prevention of cardiovascular disease<sup>31</sup>. The second  
10  
11 dichotomization was selected to match the level of physical activity (of 30 minutes of activity,  
12  
13 5 days per week) recommended by the WHO in order to prevent morbidity<sup>6</sup>. Within each  
14  
15 prediction model, the same dichotomization of PA level was used for outcome and for  
16  
17 predictor variable.  
18  
19

## 20 21 22 23 24 **Statistics**

25  
26 Differences between groups were investigated with Fishers exact test, Mann-Whitney U test  
27  
28 or t-test depending on data level. Demographic data was presented with medians and  
29  
30 percentiles or means and standard deviation (SD). The statistically significant level was set to  
31  
32  $p < 0.05$  unless stated otherwise. A multivariate logistic regression was used to investigate  
33  
34 which predictor variables may impact on the PA level one year after stroke. Two separate  
35  
36 models were built, one for each dichotomization of the outcome variable. As first step in  
37  
38 selection of potential predictor variables for the regression models, the cross tabulation was  
39  
40 used to identify and exclude predictor variables with less than 5 observations in any subgroup.  
41  
42  
43  
44 Collinearity between predictor variables was checked for using Spearman's rank correlation  
45  
46 test for ordinal variables or Likelihood Ratio test for binary variables. Variables with  
47  
48 correlation above 0.7 were considered for collinearity. Second step was a series of univariate  
49  
50 logistic regression analysis was performed on all variables not excluded by the crosstabulation  
51  
52 in order to identify significant variables for further analyzes (significance level  $p < 0.25$ , tested  
53  
54 with Wald's test). Third, the variables that were significant in the univariate step was put in  
55  
56 multivariate models, built on the enter method in which all predictor variables not reaching  
57  
58  
59

1  
2  
3 the significance level of 0.05 were ruled out. Individuals with missing data on any of the  
4  
5 variables included in the final multivariate models were excluded for analysis. Fourth, all of  
6  
7 the previously ruled out variables were then re-inserted in the final model one by one to check  
8  
9 for possible significant effect in the model ( $p < 0.05$ , Likelihood Ratio test). Finally, the  
10  
11 models were analyzed with the Likelihood Ratio test, percent of correct classification,  
12  
13 Nagelkerke  $R^2$  and the Hosmer and Lemeshow goodness of fit test. Results are presented as  
14  
15 Odds-Ratio (OR) with 95% confidence interval (CI). Data was analyzed using the Statistical  
16  
17 Package for Social Sciences (SPSS) software (IBM SPSS Statistics for Mac, Version 23.0.  
18  
19 Armonk, NY: IBM Corp.)  
20  
21  
22  
23  
24  
25  
26

## 27 RESULTS

### 30 Clinical characteristics

32  
33 The group of non-participants not assessed at one year from the SALGOT cohort ( $n=40$ ) was  
34  
35 older (mean difference 6.23 years,  $p=0.01$ ), had a higher incidence of atrial fibrillation  
36  
37 ( $p=0.04$ ) and were less active prior to their stroke ( $p=0.03$ ). No other statistical significant  
38  
39 differences were found between the groups. Demographic and clinical characteristics are  
40  
41 presented in table 1. Prior to stroke, 74% ( $n=54$ ) of the participants were considered to be  
42  
43 mostly active, in contrast to 61% ( $n=47$ ) at one year post stroke. Similarly, 41% ( $n=30$ ) of the  
44  
45 participants had a moderate to high activity level prior to stroke in contrast to 34% ( $n=26$ ) one  
46  
47 year later.  
48  
49  
50  
51  
52

### 53 Selection of predictor variables

54  
55 The type of stroke along with smoking, TIA, diabetes and atrial fibrillation prior to stroke contained  
56  
57 too few individuals in subgroups and were therefore not included into further analysis. Strong  
58  
59  
60

1  
2  
3 significant collinearity was found between the predictor variables: mRS and ARAT (-0.74). These two  
4 variables were therefore entered into separate models and their impact to respective model compared.  
5  
6 Likelihood Ratio Test showed a significant correlation between gender and pre-stroke PA  
7  
8 (LRT=5.910, p=0.02 and between treatment for high blood pressure prior to stroke and pre-stroke PA  
9  
10 (LRT= 10.358, p=0.01). The results from the univariate analysis are presented in an online  
11  
12 supplementary table (appendix B). None of the variables that were re-inserted in the final step for the  
13  
14 multivariate analysis were significant (p>0.05).  
15  
16  
17  
18  
19  
20

### 21 **Predicting being mostly inactive**

22  
23 The final model for predicting being mostly inactive post stroke included three significant  
24  
25 predictor variables: age, functional dependency (mRS) and pre-stroke PA (table 2a).  
26  
27  
28  
29  
30  
31  
32  
33  
34  
35  
36  
37  
38  
39  
40  
41  
42  
43  
44  
45  
46  
47  
48  
49  
50  
51  
52  
53  
54  
55  
56  
57  
58  
59  
60

Table 2. Logistic Regression models for predicting physical activity level one year post stroke; a) dependent variable of mostly inactive (n=73); b) dependent variable of low level of physical activity (n=77).

| <b>2a</b>                                  |          |            |                        |           |          |                    |
|--------------------------------------------|----------|------------|------------------------|-----------|----------|--------------------|
| <b>Coefficient</b>                         | <b>B</b> | <b>S.E</b> | <b>Wald's</b>          | <b>df</b> | <b>P</b> | <b>OR (95% CI)</b> |
| <b>Constant</b>                            | -6.52    | 2.15       | 9.17                   | 1         | 0.002    | 0.001              |
| <b>Age</b>                                 | 0.06     | 0.03       | 4.18                   | 1         | 0.041    | 1.07 (1.00-1.13)   |
| <b>mRS at discharge</b>                    | 1.95     | 0.71       | 7.43                   | 1         | 0.006    | 7.01 (1.73-28.43)  |
| <b>Pre-stroke PA<br/>(mostly inactive)</b> | 2.01     | 0.81       | 6.10                   | 1         | 0.014    | 7.46 (1.51-36.82)  |
| <b>Test</b>                                |          |            | <b>chi<sup>2</sup></b> | <b>df</b> | <b>P</b> |                    |
| <b>Likelihood Ratio Test</b>               |          |            | 32.59                  | 3         | <0.001   |                    |
| <b>Hosmer and<br/>Lemeshow</b>             |          |            | 9.66                   | 8         | 0.290    |                    |
| <b>2b</b>                                  |          |            |                        |           |          |                    |
| <b>Constant</b>                            | -8.12    | 2.25       | 13.03                  | 1         | <0.001   | <0.001             |
| <b>Age</b>                                 | 0.13     | 0.03       | 13.52                  | 1         | <0.001   | 1.13 (1.06-1.21)   |
| <b>mRS at discharge</b>                    | 1.29     | 0.61       | 4.41                   | 1         | 0.036    | 3.62 (1.09-12.04)  |
| <b>Test</b>                                |          |            | <b>chi<sup>2</sup></b> | <b>df</b> | <b>P</b> |                    |
| <b>Likelihood Ratio Test</b>               |          |            | 30.47                  | 2         | <0.001   |                    |
| <b>Hosmer and<br/>Lemeshow</b>             |          |            | 3.28                   | 7         | 0.858    |                    |

Dependent variable coded as a) mostly active=0, mostly inactive=1; b) moderate/high PA=0, low PA=1; Cox & Snell R<sup>2</sup> a) = 0.360; b) = 0.327 Nagelkerke R<sup>2</sup> a) = 0.489; b) = 0.453  
Abbreviations: OR=Odds Ratio, S.E=Standard Error, df=Degrees of freedom PA=Physical Activity, mRS=modified Rankin Scale

The percentage of total correctly classified for the model was 78.1 with sensitivity 75.0% and specificity of 79.5%. The odds for being mostly inactive one year after stroke, increased by 7% for every year of increasing age. The odds for being inactive also increased by 6 times if

1  
2  
3 the participant was not able to walk independently at discharge and by 6.5 times if the  
4  
5 participant was already mostly inactive pre-stroke. Predicted probabilities for this model are  
6  
7 presented in Figure 2. A separate model including the three significant predictor variables,  
8  
9 age, ARAT (instead of mRS) and pre-stroke PA demonstrated comparable level of correct  
10  
11 classification (78.6%).  
12

### 13 14 15 16 17 18 **Predicting low physical activity**

19  
20 The final model for predicting low PA level included two significant predictor variables: age  
21  
22 and functional dependency (mRS) at discharge from Stroke Unit (table 2b).  
23

24  
25 The percentage of total correctly classified for the model was 74.0 with sensitivity 77.2% and  
26  
27 specificity of 65.0%. The odds of having a low PA level one year after stroke increased with  
28  
29 13% for every year of increasing age. The odds of having a low PA level also increased, by  
30  
31 2.6 times if the participant was not able to walk independently at discharge. Predicted  
32  
33 probabilities for this model are presented in Figure 3. A separate model including the two  
34  
35 significant predictor variables, age and ARAT (instead of mRS) demonstrated comparable  
36  
37 level of correct classification (75.7%).  
38  
39  
40  
41  
42

## 43 44 **DISCUSSION**

45  
46 Higher age, functional dependency at discharge from stroke unit and being physically inactive  
47  
48 prior to stroke all contributed to increase the probability of being physically inactive one year  
49  
50 after stroke. The probability of having a low PA level after stroke increased with older age  
51  
52 and functional dependency at discharge from stroke unit. Findings from this study provide  
53  
54 new insights on what factors obtained early after stroke may impact on the PA level at later  
55  
56 stages among stroke survivors. This knowledge could be used to identify patients at risk for  
57  
58  
59  
60

1  
2  
3 inactivity or low PA level early after stroke, so that targeted intervention could be offered as  
4  
5 part of secondary prevention.  
6  
7

8  
9  
10 When comparing levels of physical activity two different dichotomizations of data (two  
11  
12 models), based on different recommendations on physical activity was used<sup>6 29</sup>. The first  
13  
14 model aimed to address inactivity as important cut-off for prevention of cardiovascular  
15  
16 disease<sup>31</sup> and the second to address PA at lower than the recommended level required for  
17  
18 prevention of morbidity<sup>6</sup>. Age was found to be a significant predictor in both models, but it  
19  
20 had a greater impact on the model for identifying those with low PA level. This finding is in  
21  
22 concurrence with an earlier study in older adults, where the age was inversely correlated with  
23  
24 the amount of moderate-intensity PA, but not with the amount of low-intensity PA<sup>32</sup>.

25  
26  
27 Functional dependency including ability to walk independently or not, was also found as a  
28  
29 significant predictor for physical activity after stroke in both models, which is in concurrence  
30  
31 with previous studies<sup>15 21</sup>. These findings suggest that, similarly to older adults, age may have  
32  
33 an impact on the intensity of PA after stroke, but also that the disability level expressed as  
34  
35 dependence in walking and daily activities influence the PA level at later stages post stroke.  
36  
37 The upper extremity functioning (ARAT) early after stroke was found to have similar effect  
38  
39 on the later post stroke PA, as the functional dependency (mRS) at discharge. Functional  
40  
41 dependency at discharge and limitation in the upper extremity use early after stroke may both  
42  
43 be associated with to the stroke severity, but these factors may also mean that the limited  
44  
45 function itself after stroke may impact the PA level negatively<sup>15-19</sup>. Being mostly inactive pre-  
46  
47 stroke had a significant effect when predicting inactivity at later stage post-stroke. However,  
48  
49 the level of PA pre-stroke, low or moderate/high, did not have a significant effect in the  
50  
51 model predicting post stroke PA level, which indicates that the level of PA post stroke may to  
52  
53 larger degree be affected by other factors, such as the disability level, age and co-morbidities.  
54  
55  
56  
57  
58  
59  
60

1  
2  
3  
4  
5 There has been little interest in investigating which early predictors might influence PA  
6  
7 among stroke-survivors and most studies on PA look at cross-sectional correlations. A  
8  
9 previous longitudinal study<sup>33</sup> investigating physical inactivity after stroke, found significant  
10  
11 correlation between time spent upright and degree of independence in activities of daily living  
12  
13 and walking at the first weeks after stroke, as well as at 1, 2 and 3 years post stroke. Although  
14  
15 these findings reflect merely cross-sectional correlations, they indicate that independence in  
16  
17 daily activities and ambulation are important for PA among stroke-survivors. In a review  
18  
19 comprising people after stroke with ability to walk,<sup>15</sup> walking ability, balance and physical  
20  
21 fitness were positively associated with PA level. Walking ability in the form of walking speed  
22  
23 has further been found to explain some of the variation of PA level among stroke-survivors<sup>16</sup>.  
24  
25 Studies on what stroke-survivors experience as barriers to PA have identified physical  
26  
27 impairment as one of the main barriers to PA<sup>21 22</sup>, yet motor impairment have been found to  
28  
29 correlate mainly with walking capacity and energy cost for walking and not with PA level<sup>17</sup>.  
30  
31 In another study physical capacity, measured by a test for fitness, was found to have a  
32  
33 moderate correlation to self-assessed PA<sup>34</sup>. In our study the mRS-scale addressing disability  
34  
35 rather than impairment was used<sup>28</sup> and although functional disability and motor impairment  
36  
37 are correlated, impairment does not fully explain disability among people with stroke<sup>20</sup>.  
38  
39 Previous studies have not shown significant correlation between age and PA after stroke<sup>15 33</sup>.  
40  
41 Age has, however, been found to be inversely correlated to PA in healthy populations<sup>12 35</sup>,  
42  
43 although not as a clear determinant compared to health status or previous PA habits<sup>12</sup>. The  
44  
45 decline in PA with increasing age does not seem to be linear but exponential in older adults<sup>35</sup>  
46  
47 and functional outcome has been found to drop steeply in the older ages among people that  
48  
49 has had with stroke<sup>36</sup>, yet most work on PA among stroke-survivors have been made in  
50  
51 persons aged 65 to 75 years<sup>15</sup>. The present study had no upper limit of age, yet the participants  
52  
53  
54  
55  
56  
57  
58  
59  
60



1  
2  
3 in the study were somewhat younger than the average stroke-population in Sweden<sup>26</sup>,  
4  
5 therefore, the effect of age on PA level in stroke-survivors might be slightly underestimated.  
6  
7 Pre-stroke PA has been found to have a significant impact on functional outcome at acute  
8  
9 phase<sup>11</sup>, 3 months<sup>10 19</sup>, one year<sup>11</sup> and two years after stroke<sup>7</sup>. A longitudinal study<sup>11</sup> showed  
10  
11 that the main differences for functional outcome were found when comparing a subgroup with  
12  
13 relatively low PA level, measured as people who walked less than 30 minutes per day with  
14  
15 groups walking for more than 30 minutes a day. The group with low amount of walking time  
16  
17 was more dependent as measured by the mRS-scale and the Barthel Index and had a slower  
18  
19 walking speed. These differences were not seen when comparing one group that walked for  
20  
21 30-60 minutes per day with another group who walked for more than 60 minutes per day<sup>11</sup>.  
22  
23 These results are in line with the findings in our study showing that being mostly active, as  
24  
25 analyzed in the first model, was important for staying active, whilst a higher PA level made  
26  
27 no further contribution in predicting a higher PA level post stroke. Pre-stroke habits of PA  
28  
29 may also possibly mean having some knowledge about PA and its beneficial health effects,  
30  
31 while lack of knowledge and disbeliefs related to PA have been reported as barriers to PA by  
32  
33 stroke-survivors<sup>21 22</sup> and could be a part of the explanation of our finding that pre-stroke PA  
34  
35 level is important for being active after stroke.  
36  
37  
38  
39  
40  
41  
42

43 The strength of this study was that many clinically important parameters that can be obtained  
44  
45 early post stroke were considered as potential predictors for long-term outcome of PA level. It  
46  
47 is of clinical importance to identify persons at risk of becoming inactive at an early stage,  
48  
49 since PA after stroke may help in preventing secondary complications<sup>4</sup>. Furthermore the  
50  
51 dichotomizations for PA level used in the study are clinically relevant and concurrent with  
52  
53 recommendations for prevention of morbidity. There are, however, several limitations to this  
54  
55 study, including a low number of cases in some subgroups that did not allow inclusion of all  
56  
57  
58  
59  
60

1  
2  
3 potential predictor variables into the regression models. The main outcome variable for PA  
4  
5 was an interview based questionnaire<sup>29,30</sup>. This type of scale presents with some problems  
6  
7 including being at an ordinal level of data and the risk for recall bias<sup>37</sup>. There is only a limited  
8  
9 number of studies investigating validity of the 6-graded scale used in this study<sup>38</sup>. The  
10  
11 dichotomization used in the first model between grade 2 and 3 may, however, be directly  
12  
13 translated into the original 4-grade Saltin-Grimby scale<sup>29,30</sup>, which has been widely used and  
14  
15 shown to have a good concurrent validity<sup>38</sup>. Self-assessed PA has also been shown to have  
16  
17 good predictor value for cardiovascular risk profiles<sup>39</sup> as well as for functional outcome after  
18  
19 stroke<sup>19</sup>. The alternative option for reporting PA is direct measurement, e.g. through using  
20  
21 accelerometers<sup>37</sup>. This option would not have been possible for establishing PA level prior to  
22  
23 stroke, but could have been for outcome.  
24  
25

26  
27 There are several other variables, such as mood, balance scales<sup>40</sup>, fear of falling<sup>20</sup> lack of  
28  
29 motivation and environmental factors<sup>21</sup> that may influence PA after stroke that were not taken  
30  
31 into account in the current study. Furthermore, our study based on the SALGOT cohort  
32  
33 included only persons with an impaired upper extremity function three days post stroke,  
34  
35 which need to be considered. Persons without impaired upper extremity might experience  
36  
37 other obstacles for being physically active than people with upper limb impairment. Thus the  
38  
39 results from the current study can only be applied to persons showing at least some  
40  
41 impairment of the upper extremity early after stroke and other studies are needed to see if the  
42  
43 findings in our study may also apply to persons without upper extremity impairment early  
44  
45 after stroke.  
46  
47

48  
49 The present study aimed to identify persons that have a higher risk in becoming inactive after  
50  
51 their stroke. The problem of inactivity amongst people with stroke is well established and  
52  
53 recent recommendations have highlighted the challenges in increasing the physical activity  
54  
55 amongst this group<sup>4</sup>. By identifying which individuals that have an increased risk of  
56  
57  
58  
59

1  
2  
3 becoming inactive after their stroke, allows clinicians to identify these persons earlier and so  
4  
5 that targeted intervention could be offered as part of secondary prevention<sup>4</sup>.  
6  
7

## 8 9 **CONCLUSION**

10  
11 Physical inactivity among stroke survivors is a major clinical problem. The present study  
12  
13 indicates that persons with a higher age, higher degree of functional dependency early after  
14  
15 stroke and a history of inactivity prior to stroke may have an increased risk of being  
16  
17 insufficiently active at one year post stroke. These results may help to guide clinicians in  
18  
19 identifying individuals in need of targeted interventions for reaching an adequate amount of  
20  
21 PA, however, these findings need to be validated by other studies to show if the results may  
22  
23 be applicable for other groups of stroke-survivors. The list of predictor variables identified in  
24  
25 this study contribute, but cannot explain all of the variation of PA level among stroke-  
26  
27 survivors and other predictors need to be further explored.  
28  
29  
30  
31  
32  
33  
34  
35  
36  
37  
38  
39  
40  
41  
42  
43  
44  
45  
46  
47  
48  
49  
50  
51  
52  
53  
54  
55  
56  
57  
58  
59  
60

**Online supplements:**

Appendix A: Scale for physical activity

Appendix B: Supplementary table of univariate logistic regression

**Acknowledgment:** The authors thank Eva-Lena Bustrén for data collection and the Riks-stroke Collaboration for help with baseline data.

**Contributors:** OAO, HCP, MAM, KSS contributed to the design of the study concept, in analysis and interpretation of results and in drafting/revising the manuscript for content. All authors have read and approved the final manuscript. In addition to this HCP and MAM performed the acquisition of data, HCP, MAM and KSS obtained funding, OAO performed the statistical analysis and KSS supervised the SALGOT-study.

**Funding:** This study was funded in parts by the Swedish Research Council (VR 2012-70X-22122-01-3), the Norrbacka Eugenia Foundation, the Foundation of the Swedish National Stroke Association, Promobila, the Swedish Brain Foundation and the Swedish Heart-Lung Foundation.

**Competing interest:** The authors declare that they have no competing interests.

**Data Sharing:** Interested researchers may submit requests for data to the authors (contact [ks.sunnerhagen@neuro.gu.se](mailto:ks.sunnerhagen@neuro.gu.se)). According to the Swedish regulation (<http://www.epn.se/en/start/regulations/>) the permission to use data is only for what has been applied for and then approved by the Ethical board.

## REFERENCES

1. O'Donnell MJ, Xavier D, Liu L, et al. Risk factors for ischaemic and intracerebral haemorrhagic stroke in 22 countries (the INTERSTROKE study): a case-control study. *Lancet* 2010;376(9735):112-23. doi: 10.1016/S0140-6736(10)60834-3
2. Lee CD, Folsom AR, Blair SN. Physical activity and stroke risk: a meta-analysis. *Stroke* 2003;34(10):2475-81. doi: 10.1161/01.STR.0000091843.02517.9D
3. Wendel-Vos GC, Schuit AJ, Feskens EJ, et al. Physical activity and stroke. A meta-analysis of observational data. *Int J Epidemiol* 2004;33(4):787-98. doi: 10.1093/ije/dyh168
4. Billinger SA, Arena R, Bernhardt J, et al. Physical activity and exercise recommendations for stroke survivors: a statement for healthcare professionals from the American Heart Association/American Stroke Association. *Stroke* 2014;45(8):2532-53. doi: 10.1161/STR.0000000000000022
5. World Health Organization. Global health risks: mortality and burden of disease attributable to selected major risks. . Geneva, 2009.
6. WHO: global recommendations on physical activity for health 2010 [Available from: [http://apps.who.int/iris/bitstream/10665/44399/1/9789241599979\\_eng.pdf](http://apps.who.int/iris/bitstream/10665/44399/1/9789241599979_eng.pdf) accessed August 19th 2015.
7. Krarup LH, Truelsen T, Glud C, et al. Prestroke physical activity is associated with severity and long-term outcome from first-ever stroke. *Neurology* 2008;71(17):1313-8. doi: 10.1212/01.wnl.0000327667.48013.9f
8. Deplanque D, Masse I, Libersa C, et al. Previous leisure-time physical activity dose dependently decreases ischemic stroke severity. *Stroke Res Treat* 2012;2012:614925. doi: 10.1155/2012/614925
9. Hallmarker U, Asberg S, Michaelsson K, et al. Risk of Recurrent Stroke and Death After First Stroke in Long-Distance Ski Race Participants. *J Am Heart Assoc* 2015;4(10):e002469. doi: 10.1161/JAHA.115.002469
10. Stroud N, Mazwi TM, Case LD, et al. Prestroke physical activity and early functional status after stroke. *J Neurol Neurosurg Psychiatry* 2009;80(9):1019-22. doi: 10.1136/jnnp.2008.170027
11. Ursin MH, Ihle-Hansen H, Fure B, et al. Effects of premorbid physical activity on stroke severity and post-stroke functioning. *J Rehabil Med* 2015;47(7):612-7. doi: 10.2340/16501977-1972
12. Bauman AE, Reis RS, Sallis JF, et al. Correlates of physical activity: why are some people physically active and others not? *Lancet* 2012;380(9838):258-71. doi: 10.1016/S0140-6736(12)60735-1
13. Trost SG, Owen N, Bauman AE, et al. Correlates of adults' participation in physical activity: review and update. *Med Sci Sports Exerc* 2002;34(12):1996-2001. doi: 10.1249/01.MSS.0000038974.76900.92
14. Rand D, Eng JJ, Tang PF, et al. Daily physical activity and its contribution to the health-related quality of life of ambulatory individuals with chronic stroke. *Health Qual Life Outcomes* 2010;8:80. doi: 10.1186/1477-7525-8-80
15. English C, Manns PJ, Tucak C, et al. Physical activity and sedentary behaviors in people with stroke living in the community: a systematic review. *Phys Ther* 2014;94(2):185-96. doi: 10.2522/ptj.20130175
16. Danielsson A, Meirelles C, Willen C, et al. Physical activity in community-dwelling stroke survivors and a healthy population is not explained by motor function only. *PM R* 2014;6(2):139-45. doi: 10.1016/j.pmrj.2013.08.593
17. Danielsson A, Willen C, Sunnerhagen KS. Physical activity, ambulation, and motor impairment late after stroke. *Stroke Res Treat* 2012;2012:818513. doi: 10.1155/2012/818513
18. Rand D, Eng JJ, Tang PF, et al. How active are people with stroke?: use of accelerometers to assess physical activity. *Stroke* 2009;40(1):163-8. doi: 10.1161/STROKEAHA.108.523621

19. Lopez-Cancio E, Ricciardi AC, Sobrino T, et al. Reported Prestroke Physical Activity Is Associated with Vascular Endothelial Growth Factor Expression and Good Outcomes after Stroke. *J Stroke Cerebrovasc Dis* 2017;26(2):425-30. doi: 10.1016/j.jstrokecerebrovasdis.2016.10.004
20. Roth EJ, Heinemann AW, Lovell LL, et al. Impairment and disability: their relation during stroke rehabilitation. *Arch Phys Med Rehabil* 1998;79(3):329-35.
21. Nicholson S, Sniehotta FF, van Wijck F, et al. A systematic review of perceived barriers and motivators to physical activity after stroke. *Int J Stroke* 2013;8(5):357-64. doi: 10.1111/j.1747-4949.2012.00880.x
22. Jackson S, Mercer C, Singer BJ. An exploration of factors influencing physical activity levels amongst a cohort of people living in the community after stroke in the south of England. *Disabil Rehabil* 2016:1-11. doi: 10.1080/09638288.2016.1258437
23. Alt Murphy M, Persson HC, Danielsson A, et al. SALGOT - Stroke Arm Longitudinal study at the University of Gothenburg, prospective cohort study protocol. *BMC Neurol* 2011;11(1):56. doi: 10.1186/1471-2377-11-56 [published Online First: 2011/05/27]
24. Lyle RC. A performance test for assessment of upper limb function in physical rehabilitation treatment and research. *Int J Rehabil Res* 1981;4(4):483-92. [published Online First: 1981/01/01]
25. von Elm E, Altman DG, Egger M, et al. The Strengthening the Reporting of Observational Studies in Epidemiology (STROBE) statement: guidelines for reporting observational studies. *Lancet* 2007;370(9596):1453-7. doi: 10.1016/S0140-6736(07)61602-X
26. Asplund K, Hulter Asberg K, Appelros P, et al. The Riks-Stroke story: building a sustainable national register for quality assessment of stroke care. *International journal of stroke : official journal of the International Stroke Society* 2011;6(2):99-108. doi: 10.1111/j.1747-4949.2010.00557.x [published Online First: 2011/03/05]
27. Brott T, Adams HP, Jr., Olinger CP, et al. Measurements of acute cerebral infarction: a clinical examination scale. *Stroke* 1989;20(7):864-70. [published Online First: 1989/07/01]
28. van Swieten JC, Koudstaal PJ, Visser MC, et al. Interobserver agreement for the assessment of handicap in stroke patients. *Stroke; a journal of cerebral circulation* 1988;19(5):604-7. [published Online First: 1988/05/01]
29. Grimby G. Physical activity and muscle training in the elderly. *Acta Med Scand Suppl* 1986;711:233-7.
30. Mattiasson-Nilo I, Sonn U, Johannesson K, et al. Domestic activities and walking in the elderly: evaluation from a 30-hour heart rate recording. *Aging (Milano)* 1990;2(2):191-8.
31. Ladenvall P, Persson CU, Mandalenakis Z, et al. Low aerobic capacity in middle-aged men associated with increased mortality rates during 45 years of follow-up. *Eur J Prev Cardiol* 2016;23(14):1557-64. doi: 10.1177/2047487316655466
32. Takagi D, Nishida Y, Fujita D. Age-associated changes in the level of physical activity in elderly adults. *J Phys Ther Sci* 2015;27(12):3685-7. doi: 10.1589/jpts.27.3685
33. Kunkel D, Fitton C, Burnett M, et al. Physical inactivity post-stroke: a 3-year longitudinal study. *Disabil Rehabil* 2015;37(4):304-10. doi: 10.3109/09638288.2014.918190
34. Lindahl M, Hansen L, Pedersen A, et al. Self-reported physical activity after ischemic stroke correlates with physical capacity. *Adv Physiother* 2008;10(4):188-94.
35. Buchman AS, Wilson RS, Yu L, et al. Total daily activity declines more rapidly with increasing age in older adults. *Arch Gerontol Geriatr* 2014;58(1):74-9. doi: 10.1016/j.archger.2013.08.001
36. Knoflach M, Matosevic B, Rucker M, et al. Functional recovery after ischemic stroke--a matter of age: data from the Austrian Stroke Unit Registry. *Neurology* 2012;78(4):279-85. doi: 10.1212/WNL.0b013e31824367ab
37. Hagstromer M, Oja P, Sjostrom M. Physical activity and inactivity in an adult population assessed by accelerometry. *Med Sci Sports Exerc* 2007;39(9):1502-8. doi: 10.1249/mss.0b013e3180a76de5

- 1  
2  
3 38. Grimby G, Borjesson M, Jonsdottir IH, et al. The "Saltin-Grimby Physical Activity Level Scale" and  
4 its application to health research. *Scand J Med Sci Sports* 2015;25 Suppl 4:119-25. doi:  
5 10.1111/sms.12611  
6 39. Thune I, Njolstad I, Lochen ML, et al. Physical activity improves the metabolic risk profiles in men  
7 and women: the Tromso Study. *Arch Intern Med* 1998;158(15):1633-40.  
8 40. Alzahrani MA, Dean CM, Ada L, et al. Mood and Balance are Associated with Free-Living Physical  
9 Activity of People after Stroke Residing in the community. *Stroke Res Treat*  
10 2012;2012:470648. doi: 10.1155/2012/470648  
11  
12  
13  
14  
15  
16  
17  
18  
19  
20  
21  
22  
23  
24  
25  
26  
27  
28  
29  
30  
31  
32  
33  
34  
35  
36  
37  
38  
39  
40  
41  
42  
43  
44  
45  
46  
47  
48  
49  
50  
51  
52  
53  
54  
55  
56  
57  
58  
59  
60

For peer review only

## Figure legends

*Fig 1. Flowchart for inclusion of the study participants*

*Fig 2. Predicted probabilities of being mostly inactive one year after stroke. The predicted probability increases with higher age, higher degree of functional dependency and being physically inactive pre-stroke.*

*Fig.3 Predicted probability for having low PA one year after stroke. The predicted probability increases with higher age and higher degree of functional dependency.*



1  
2  
3  
4  
5  
6  
7  
8  
9  
10  
11  
12  
13  
14  
15  
16  
17  
18  
19  
20  
21  
22  
23  
24  
25  
26  
27  
28  
29  
30  
31  
32  
33  
34  
35  
36  
37  
38  
39  
40  
41  
42  
43  
44  
45  
46  
47  
48  
49  
50  
51  
52  
53  
54  
55  
56  
57  
58  
59  
60

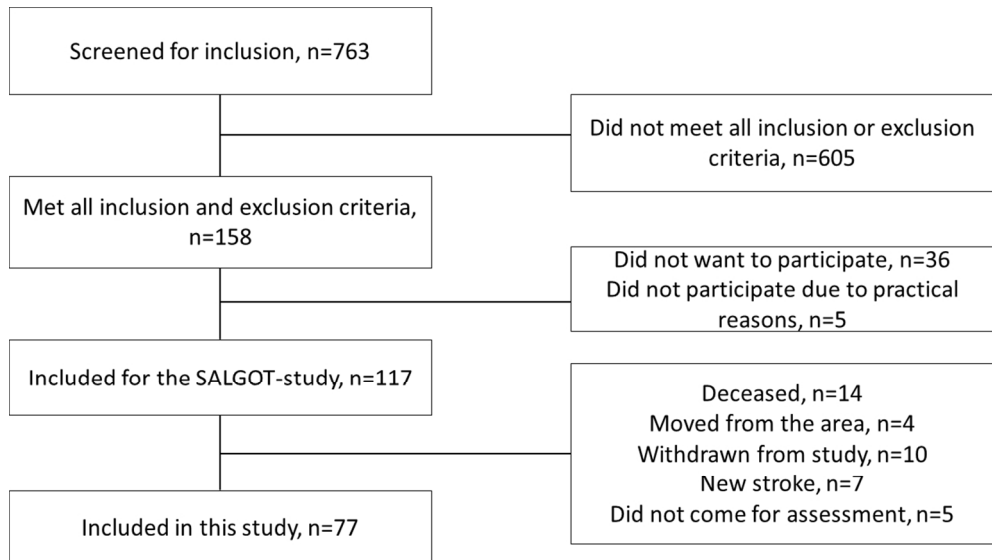

Flowchart for inclusion of the study participants

108x60mm (300 x 300 DPI)

review only

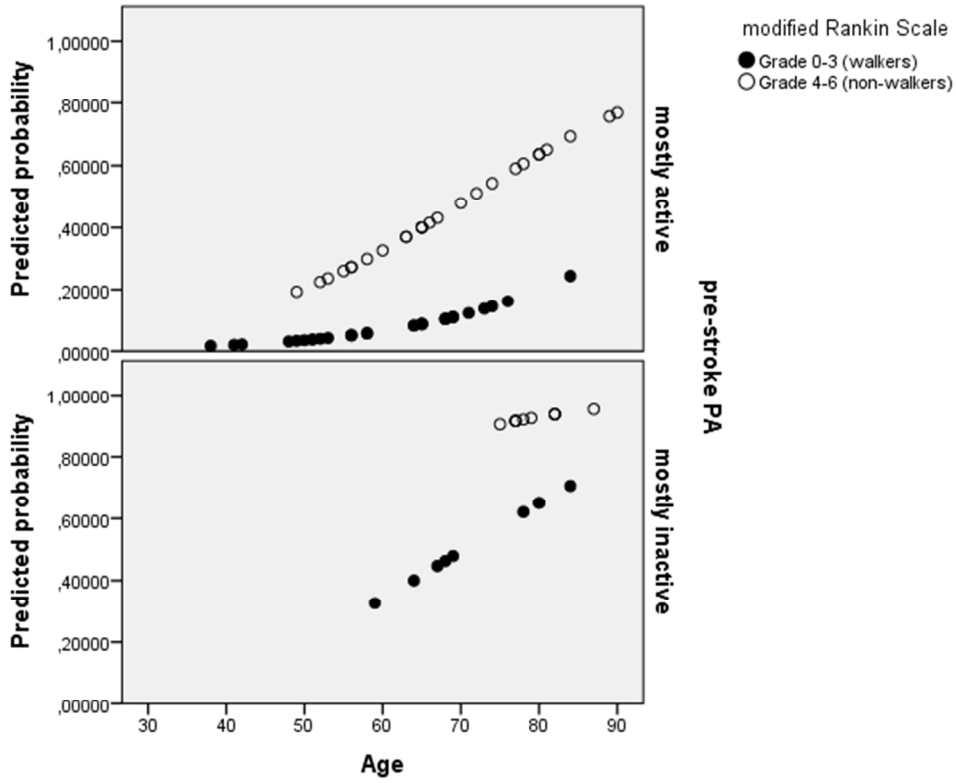

Predicted probabilities of being mostly inactive one year after stroke. The predicted probability increases with higher age, higher degree of functional dependency and being physically inactive pre-stroke.

53x42mm (300 x 300 DPI)

View Only

1  
2  
3  
4  
5  
6  
7  
8  
9  
10  
11  
12  
13  
14  
15  
16  
17  
18  
19  
20  
21  
22  
23  
24  
25  
26  
27  
28  
29  
30  
31  
32  
33  
34  
35  
36  
37  
38  
39  
40  
41  
42  
43  
44  
45  
46  
47  
48  
49  
50  
51  
52  
53  
54  
55  
56  
57  
58  
59  
60

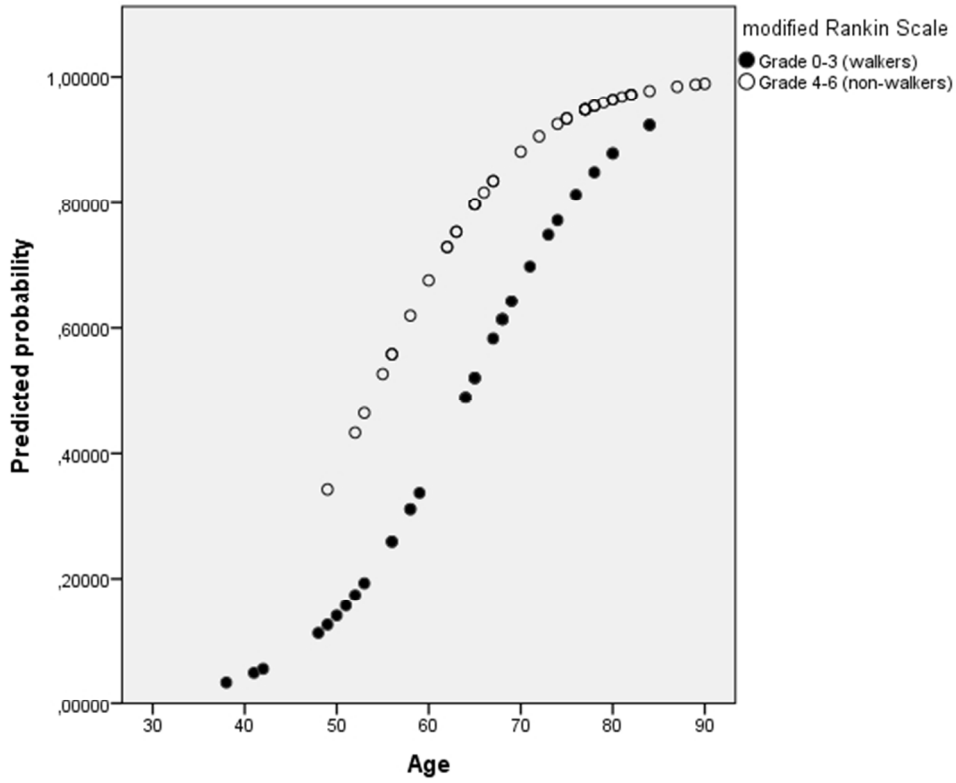

Predicted probability for having low PA one year after stroke. The predicted probability increases with higher age and higher degree of functional dependency.

53x42mm (300 x 300 DPI)

View Only

## Appendix A

### 6-level scale for physical activity

1. Hardly no physical activity
2. Mostly sitting, sometimes a walk, easy gardening or similar tasks, sometimes light household activities such as heating up food, dusting, or “clearing away”
3. Light physical exercise for about 2-4 hours a week, e.g. walks, fishing, dancing, ordinary gardening etc., including walks to and from shops. Main responsibility for light domestic work such as cooking, dusting, “clearing away”, and making beds. Performs or takes part in weekly cleaning
4. Moderate exercise 1-2 hours a week, e.g. jogging, swimming, gymnastics, heavier gardening, home repair or easier physical activities more than 4 hours a week. Responsible for all domestic activities, easy as well as heavy. Weekly cleaning with vacuum cleaning, washing floors and window-cleaning
5. Moderate exercise at least 3 hours a week, e.g. tennis, swimming, jogging etc.
6. Hard or very hard exercise regularly and several times a week, during which physical exertion is great, e.g. jogging, skiing

## Appendix B

Supplementary table. Univariate logistic regression analysis between predictors and outcome variable of physical activity level one year after stroke

| Predictor variables                  | Mostly inactive<br>(grade 1-2) |               | Low PA<br>(grade 1-3) |               |
|--------------------------------------|--------------------------------|---------------|-----------------------|---------------|
|                                      | Wald                           | p-value       | Wald                  | p-value       |
| Age                                  | 14.018                         | <0.001        | 16.483                | <0.001        |
| Gender                               | 0.001                          | 0.970         | 0.518                 | 0.472         |
| Ischemic/hemorrhagic                 | 1.274                          | 0.259         | <sup>1)</sup>         | <sup>1)</sup> |
| Smoking                              | <sup>1)</sup>                  | <sup>1)</sup> | 1.083                 | 0.298         |
| Shared living                        | 1.918                          | 0.166         | 4.597                 | 0.032         |
| Treatment for high<br>blood pressure | 1.487                          | 0.223         | <sup>1)</sup>         | <sup>1)</sup> |
| NIHSS                                | 3.946                          | 0.061         | 1.588                 | 0.208         |
| ARAT                                 | 9.545                          | 0.002         | 10.023                | 0.002         |
| mRS                                  | 11.902                         | 0.001         | 9.512                 | 0.002         |
| Pre-stroke PA                        | 11.755                         | 0.001         | 6.669                 | 0.010         |

<sup>1)</sup>= not applicable due to too small subgroups for analysis.

*P-Value for significance set for 0.25*

*Abbreviations: NIHSS=National Institute of Health Stroke Scale, mRS=modified Rankin Scale, ARAT=Action Research Arm Test, PA=Physical Activity.*

STROBE 2007 (v4) Statement—Checklist of items that should be included in reports of *cohort studies*

| Section/Topic                | Item # | Recommendation                                                                                                                                                                       | Reported on page # |
|------------------------------|--------|--------------------------------------------------------------------------------------------------------------------------------------------------------------------------------------|--------------------|
| Title and abstract           | 1      | (a) Indicate the study's design with a commonly used term in the title or the abstract                                                                                               | 1,2                |
|                              |        | (b) Provide in the abstract an informative and balanced summary of what was done and what was found                                                                                  | 2                  |
| <b>Introduction</b>          |        |                                                                                                                                                                                      |                    |
| Background/rationale         | 2      | Explain the scientific background and rationale for the investigation being reported                                                                                                 | 4                  |
| Objectives                   | 3      | State specific objectives, including any prespecified hypotheses                                                                                                                     | 4                  |
| <b>Methods</b>               |        |                                                                                                                                                                                      |                    |
| Study design                 | 4      | Present key elements of study design early in the paper                                                                                                                              | 5                  |
| Setting                      | 5      | Describe the setting, locations, and relevant dates, including periods of recruitment, exposure, follow-up, and data collection                                                      | 5                  |
| Participants                 | 6      | (a) Give the eligibility criteria, and the sources and methods of selection of participants. Describe methods of follow-up                                                           | 5                  |
|                              |        | (b) For matched studies, give matching criteria and number of exposed and unexposed                                                                                                  |                    |
| Variables                    | 7      | Clearly define all outcomes, exposures, predictors, potential confounders, and effect modifiers. Give diagnostic criteria, if applicable                                             | 6-8                |
| Data sources/<br>measurement | 8*     | For each variable of interest, give sources of data and details of methods of assessment (measurement). Describe comparability of assessment methods if there is more than one group | 7,8                |
| Bias                         | 9      | Describe any efforts to address potential sources of bias                                                                                                                            | 16, study protocol |
| Study size                   | 10     | Explain how the study size was arrived at                                                                                                                                            | 5, figure 1        |
| Quantitative variables       | 11     | Explain how quantitative variables were handled in the analyses. If applicable, describe which groupings were chosen and why                                                         | 6-8                |
| Statistical methods          | 12     | (a) Describe all statistical methods, including those used to control for confounding                                                                                                | 8,9                |
|                              |        | (b) Describe any methods used to examine subgroups and interactions                                                                                                                  | 8,9                |
|                              |        | (c) Explain how missing data were addressed                                                                                                                                          | 9                  |
|                              |        | (d) If applicable, explain how loss to follow-up was addressed                                                                                                                       | 5                  |
|                              |        | (e) Describe any sensitivity analyses                                                                                                                                                | 9                  |
| <b>Results</b>               |        |                                                                                                                                                                                      |                    |

|                          |     |                                                                                                                                                                                                              |          |
|--------------------------|-----|--------------------------------------------------------------------------------------------------------------------------------------------------------------------------------------------------------------|----------|
| Participants             | 13* | (a) Report numbers of individuals at each stage of study—eg numbers potentially eligible, examined for eligibility, confirmed eligible, included in the study, completing follow-up, and analysed            | Figure 1 |
|                          |     | (b) Give reasons for non-participation at each stage                                                                                                                                                         | Figure 1 |
|                          |     | (c) Consider use of a flow diagram                                                                                                                                                                           | Figure 1 |
| Descriptive data         | 14* | (a) Give characteristics of study participants (eg demographic, clinical, social) and information on exposures and potential confounders                                                                     | 7        |
|                          |     | (b) Indicate number of participants with missing data for each variable of interest                                                                                                                          | 7        |
|                          |     | (c) Summarise follow-up time (eg, average and total amount)                                                                                                                                                  |          |
| Outcome data             | 15* | Report numbers of outcome events or summary measures over time                                                                                                                                               | 11       |
| Main results             | 16  | (a) Give unadjusted estimates and, if applicable, confounder-adjusted estimates and their precision (eg, 95% confidence interval). Make clear which confounders were adjusted for and why they were included | 11       |
|                          |     | (b) Report category boundaries when continuous variables were categorized                                                                                                                                    | 7,8      |
|                          |     | (c) If relevant, consider translating estimates of relative risk into absolute risk for a meaningful time period                                                                                             |          |
| Other analyses           | 17  | Report other analyses done—eg analyses of subgroups and interactions, and sensitivity analyses                                                                                                               | 9-12     |
| <b>Discussion</b>        |     |                                                                                                                                                                                                              |          |
| Key results              | 18  | Summarise key results with reference to study objectives                                                                                                                                                     | 12       |
| <b>Limitations</b>       |     |                                                                                                                                                                                                              |          |
| Interpretation           | 20  | Give a cautious overall interpretation of results considering objectives, limitations, multiplicity of analyses, results from similar studies, and other relevant evidence                                   | 12-17    |
| Generalisability         | 21  | Discuss the generalisability (external validity) of the study results                                                                                                                                        | 13,16,17 |
| <b>Other information</b> |     |                                                                                                                                                                                                              |          |
| Funding                  | 22  | Give the source of funding and the role of the funders for the present study and, if applicable, for the original study on which the present article is based                                                | 18       |

\*Give information separately for cases and controls in case-control studies and, if applicable, for exposed and unexposed groups in cohort and cross-sectional studies.

**Note:** An Explanation and Elaboration article discusses each checklist item and gives methodological background and published examples of transparent reporting. The STROBE checklist is best used in conjunction with this article (freely available on the Web sites of PLoS Medicine at <http://www.plosmedicine.org/>, Annals of Internal Medicine at <http://www.annals.org/>, and Epidemiology at <http://www.epidem.com/>). Information on the STROBE Initiative is available at [www.strobe-statement.org](http://www.strobe-statement.org).

## STUDY PROTOCOL

## Open Access

# SALGOT - Sroke Arm Longitudinal study at the University of Gothenburg, prospective cohort study protocol

Margit Alt Murphy\*, Hanna C Persson, Anna Danielsson, Jurgen Broeren, Åsa Lundgren-Nilsson and Katharina S Sunnerhagen

## Abstract

**Background:** Recovery patterns of upper extremity motor function have been described in several longitudinal studies, but most of these studies have had selected samples, short follow up times or insufficient outcomes on motor function. The general understanding is that improvements in upper extremity occur mainly during the first month after the stroke incident and little if any, significant recovery can be gained after 3-6 months. The purpose of this study is to describe the recovery of upper extremity function longitudinally in a non-selected sample initially admitted to a stroke unit with first ever stroke, living in Gothenburg urban area.

**Methods/Design:** A sample of 120 participants with a first-ever stroke and impaired upper extremity function will be consecutively included from an acute stroke unit and followed longitudinally for one year. Assessments are performed at eight occasions: at day 3 and 10, week 3, 4 and 6, month 3, 6 and 12 after onset of stroke. The primary clinical outcome measures are Action Research Arm Test and Fugl-Meyer Assessment for Upper Extremity. As additional measures, two new computer based objective methods with kinematic analysis of arm movements are used. The ABILHAND questionnaire of manual ability, Stroke Impact Scale, grip strength, spasticity, pain, passive range of motion and cognitive function will be assessed as well. At one year follow up, two patient reported outcomes, Impact on Participation and Autonomy and EuroQol Quality of Life Scale, will be added to cover the status of participation and aspects of health related quality of life.

**Discussion:** This study comprises a non-selected population with first ever stroke and impaired arm function. Measurements are performed both using traditional clinical assessments as well as computer based measurement systems providing objective kinematic data. The ICF classification of functioning, disability and health is used as framework for the selection of assessment measures. The study design with several repeated measurements on motor function will give us more confident information about the recovery patterns after stroke. This knowledge is essential both for optimizing rehabilitation planning as well as providing important information to the patient about the recovery perspectives.

**Trial registration:** ClinicalTrials.gov: NCT01115348

**Keywords:** stroke, upper extremity, recovery of function, kinematics, longitudinal study

\* Correspondence: [margit.alt-murphy@vgregion.se](mailto:margit.alt-murphy@vgregion.se)  
Department of Clinical Neuroscience and Rehabilitation, Institute of Neuroscience and Physiology, Sahlgrenska Academy at University of Gothenburg, Gothenburg, Sweden



## Background

Stroke is defined by the World Health Organization (WHO) as rapidly developing clinical signs of focal or global disturbance of cerebral function, with symptoms lasting more than 24 hours or leading to death and with no apparent non-vascular cause. The incidence of stroke in Sweden is 300 cases per 100 000 inhabitants in a year of whom 200 suffer a first incidence of stroke leading to a total of 18 000 new stroke victims. About 25000 - 30000 persons yearly suffer from acute stroke each year in Sweden. Of these, about 20% will die within the first month and about 1/3 of the survivors will remain significantly disabled after 6-12 months [1].

The upper extremity function is impaired after stroke in approximately 70-80% of patients in acute phase and in 40% in chronic phase [2-4]. This impairment limits the voluntary, well coordinated, and effective movements as well as a person's level of activity [5] and participation in their social and physical environment [2]. This longstanding disability might also influence the quality of life [6].

Recovery of motor skills after stroke depends both on spontaneous reparative process as well as reorganization of neural mechanisms, influenced by inputs and demands given to the motor control system. The current perspective on motor learning focuses on active task-oriented training and how feedback and other basic training principals such as regularity, intensity and specificity affects the long-term recovery [7,8]. In order to detect meaningful improvements in motor function, appropriate outcome measures should be used. Beside the requirements on reliability, validity and sensitivity, the issues of functionality and objectivity must be considered while selecting the appropriate measures. Assessment methods with continuous variables are recommended to be included into evaluation batteries since they might have higher power to detect the important improvements in motor recovery [9-11].

Improved understanding of the recovery patterns after stroke is essential for planning and execution of optimal rehabilitation. Recovery patterns of upper extremity function have been described for selected stroke populations in several longitudinal studies. The general idea is that improvements in the upper extremity occur mainly during the first month after onset of the stroke and that little, if any, significant recovery can be gained after 3-6 months [3,12-14]. Several studies, conducted in selected populations at rehabilitation facilities have shown that, in some patients, the improvements also continued for a longer time [2,4,15]. There are only a few studies with non-selected community based populations describing the recovery patterns in the upper extremity. These studies report a similar recovery pattern with little or no significant recovery beyond 2-3 months [3,16-18].

Whether this is correct is not clear for the non-selected studies, since in some reports the sample sizes were small [14,15], the follow up times were short [3,4] or the information on the motor assessments was not satisfactory [3,18].

## Kinematic measurement - drinking task

Kinematics describes movements of the body through space and time, including linear and angular displacements, velocities and accelerations, but without reference to the forces involved. Kinematic data can be achieved by optoelectronic systems where multiple high-speed cameras send out infra red light signals and detect the reflection from the markers placed on the body. Kinematic variables provide objective, precise and detailed measures of movement performance and quality.

Kinematic movement analysis has become a useful assessment tool within rehabilitation and is employed routinely for gait analyses. Few studies have used kinematic movement analysis to examine the upper extremity in a longitudinal design. In one of these studies the kinematic data was obtained from an isolated fast elbow extension [15,19] and in the other a targeting fast reaching movement [20]. In order to better understand the situation of a person with impaired upper extremity function, information is needed regarding activities of daily living. It is known that the motor activity of the upper extremity is dependent on the meaning of the task and on the shape and placement of the object [21]. Thus, it is meaningful to study natural purposeful movements with real-life objects. In an earlier study we have developed a test protocol and a program for data analyses of the kinematic variables for the activity of drinking from a glass, which has been applied in a control setting [22] and in stroke subjects [23].

## Kinematic measurement - Virtual reality test

Virtual reality (VR) can be described as the world perceived in a computer. VR systems that include a haptic device can provide tactile feedback to the user through the force feedback. If the system detects a collision between the device and virtual objects, it transmits a reaction to the user's hand, which interacts with perception of the test or training situation [24]. In the real world, objects are usually perceived in the same location whether the sense involved is vision or touch (haptic). In the virtual world, the precise co-location of haptics is technically harder to achieve, but when the co-location is accurate the realism of the manipulation is very high and the user's performance is improved [25]. The knowledge about effects of using VR in assessments and training after stroke is still limited, but sufficiently encouraging to justify additional clinical trials in this population [26-31].

## Theoretical background

WHO approved in May 2001 the model on International Classification of Functioning, Disability and Health (ICF) [32] to assess the consequences of a disorder or a disease on the individual person. The ICF model provides a multi-perspective approach to the classification of functioning and disability as an interactive and evolutionary process. In the model an individual's functions in a specific domain is an interaction or complex relationship between the health conditions (physical or mental) and contextual factors (social and physical environment as well as personal factors). The components of ICF can be used to indicate problems (e.g. impairments, activity limitations or participation restrictions summarized under the umbrella term disability) in different areas. This approach forces health professionals to look wider than the usual perspective, which has traditionally lain in the domain of body function and structures. The model boosts the traditional rehabilitation ideology where the focus has not been on the organ but on the person and thereby requiring different treatments depending on that person's goal. In order to assess the consequences of a disease we need to look at different components of the ICF.

Longitudinal studies are difficult to perform. Sweden has a unique situation since people are quite easy to trace through the civic system and moving from one region to another is not so frequent. In addition, the representativeness for the disease is good since all patients within a catchment area are usually referred to the same hospital as private alternatives are scarce and thereby the possibilities to generalize the results are good.

The purpose of this study is to describe the recovery of upper extremity function longitudinally in a non-selected sample with first ever clinical stroke admitted to a stroke unit.

The specific objectives of the present study are to:

- A. Follow recovery of upper extremity by using clinical measures of body function (motor function, spasticity), activity (use of the arm and hand) and participation (impact of limitations) after stroke
- B. Follow functional recovery by using objective, new IT technology (kinematic movement analysis and VR-test with sensory feedback) after stroke
- C. To gather the assessments of participants self-perceived upper extremity function over the first year after stroke
- D. To predict function at 12 months by analysis of data gathered at first week after onset of stroke

## Methods/Design

A sample of 120 persons with a first occurrence of stroke will be included and followed longitudinally for

one year after the stroke. The group will consist of consecutively included persons recruited from the stroke unit at Sahlgrenska University Hospital, Gothenburg, Sweden. The Stroke unit at Sahlgrenska University Hospital serves the larger Gothenburg urban area, thus all persons from this catchment area are randomly referred to the Sahlgrenska University Hospital. The project is approved by the Regional Ethical Review Board and the Helsinki declaration is followed. Written informed consent will be obtained from the participants or from their closest relative. The SALGOT study is registered on ClinicalTrials.gov (NCT01115348).

Inclusion criteria are:

- Diagnosed first ever clinical stroke, based on WHO criteria (ischemic infarct, haemorrhagic and subarachnoidal bleeding)
- Impaired upper extremity function. This is defined in two steps. On the first or second day after stroke onset the upper extremity function is assessed with Modified Motor Assessment Scale (M-MAS UAS-95) [33] (this is performed as standard clinical assessment by physiotherapists working at the stroke unit). All persons, who do not obtain the maximum score on the subtests of arm function, hand movements and fine motor function due to hemiparesis, will be informed about the study and retested at day three after stroke with Action Research Arm Test (ARAT) [34]. All persons who do not achieve the maximum score for ARAT (score 57) will be included.
- Admitted to the stroke unit within three days after stroke onset
- Living in the Gothenburg urban area (maximal 35 km from the Sahlgrenska University Hospital)
- Age 18 or older

Exclusion criteria are:

- Upper-extremity injury or condition prior to the stroke that limits the functional use of the affected arm and hand
- Severe multi-impairment or diminished physical condition before the stroke that will affect the arm function
- Life expectancy less than 12 months due to other illness (cardiac disease, malignancy) or severity of stroke injury
- Not Swedish speaking prior to the stroke incident

## Design and procedure

This study will evaluate the recovery patterns after first ever stroke without any intervention except standard rehabilitation planning and procedures. All included

participants will be assessed eight times during the first year after stroke. Assessments are performed at day 3 and 10, week 3, 4 and 6, month 3, 6 and 12 after onset of stroke. Tests are administered in block randomized manner in order to minimize the systematic testing bias. The test order and the reason for missed or unsuccessful test results will be recorded in a protocol. All tests are performed by three experienced physical therapists, undergoing a training period together for the assessment battery prior to the study start. ICF classification of functioning, disability and health is used as framework for the selection of assessment measures (Figure 1).

### Outcome measures

Demographic data will be collected during the first assessment. Stroke subtype will be confirmed by CT and/or MRI scans. Ischemic strokes will be classified for subtype and site for lesion by using TOAST [35] and Bamford classifications [36]. Treatments of thrombolysis or thromboectomy will be registered. Additional data will be extracted from the national quality register for stroke - Swedish Stroke Register [1]. The Self-Administered Comorbidity Questionnaire (SCQ) will be used to collect additional information on relevant medical conditions and problems [37]. Cognitive function is evaluated at every test occasion using Barrow Neurological Institute Screen for Higher Cerebral Functions (BNIS) [38]. The three prescreen items scoring the level of consciousness/alertness, cooperation and basic communication skills and the item of

auditory comprehension will be assessed. The level of physical activity is recorded by a 6-grade scale of Physical Activity Classification [39,40]. This instrument is valid, short and suitable for longitudinal studies and takes account the activity level both during domestic and fitness activities [40]. Exact time points for all assessments are listed in Table 1.

### Clinical outcome measures of function and activity

The upper extremity motor function will be assessed using the Fugl-Meyer Assessment for Upper Extremity (FMA-UE) [41], and a maximum score of 66 corresponds to normal motor function. The psychometric properties of Fugl-Meyer Assessment have shown excellent reliability and validity [41-43]. The non-motor domains of FMA-UE, sensation, passive range of motion and pain during passive joint motions will be completed as well.

Action research Arm Test (ARAT) is a performance test for upper extremity function and dexterity [44]. The ARAT uses ordinal scoring on 19 items divided into four hierarchical subtests: grasp, grip, pinch and gross movement. Each upper extremity is evaluated individually and the test can be completed in 5-15 minutes [44,45]. ARAT has been shown to have good validity, sensitivity to spontaneous and therapy-related gains after stroke both in acute and chronic phase [44,46]. The ARAT has shown good responsiveness [47] and excellent inter-rater and intra-rater reliability [44,48].

Spasticity will be assessed with the Modified Ashworth Scale (MAS). The muscle groups of elbow flexors and



**Table 1 Scheme over the assessments and time-points for test occasions**

| Assessments               | Test occasion (d=day, w=week, m=month) |    |     |    |    |    |    |    |     |
|---------------------------|----------------------------------------|----|-----|----|----|----|----|----|-----|
|                           | d1                                     | d3 | d10 | w3 | w4 | w6 | m3 | m6 | m12 |
| M-MAS UAS -95             | x                                      |    |     |    |    |    |    |    |     |
| NIHSS                     | x                                      |    |     |    |    |    |    |    |     |
| BNIS                      |                                        | x  | x   | x  | x  | x  | x  | x  | x   |
| Physical activity scale   |                                        | x  |     |    |    |    |    | x  | x   |
| FMA-UE                    |                                        | x  | x   | x  | x  | x  | x  | x  | x   |
| Action Research Arm Test  |                                        | x  | x   | x  | x  | x  | x  | x  | x   |
| ABILHAND                  |                                        | x  | x   | x  | x  | x  | x  | x  | x   |
| Grip strength             |                                        | x  | x   | x  | x  | x  | x  | x  | x   |
| Modified Ashworth Scale   |                                        | x  | x   | x  | x  | x  | x  | x  | x   |
| Kinematic - drinking task |                                        | x  | x   |    | x  |    | x  | x  | x   |
| Kinematic - VR-test       |                                        | x  | x   | x  | x  | x  | x  | x  | x   |
| Stroke Impact Scale       |                                        |    | x   |    | x  |    | x  | x  | x   |
| IPA-E                     |                                        |    |     |    |    |    |    |    | x   |
| EQ-5D                     |                                        |    |     |    |    |    |    |    | x   |

extensors, wrist flexors and extensors will be evaluated. The MAS is the best alternative for spasticity assessment in clinical setting available and has been shown to have fair reliability for these joints [49,50].

The grip strength will be measured using the Jamar Hand Dynamometer. Standardized positioning and instructions are followed and the average of three trials is used as test outcome [51]. Reliability for the grip strength measure is very high [52].

#### Kinematic measurements - objective outcomes of performance

Three-dimensional motion analysis of upper extremity during drinking task will be performed with a 5-camera optoelectronic ProReflex Motion Capture System (MCU240 Hz, Qualisys AB, Sweden). The tracing of the three-dimensional coordinate positions of the markers is completed automatically by Qualisys Track Manager, 2.0. The capture data is then transferred to MATLAB (The MathWorks Inc) software for custom-made analysis. A standardized drinking task with stable test-retest reliability will be used [53]. The participant is sitting in front of the table with tested hand resting on the edge of the table (Figure 2). A drinking glass, filled with 100 mL water is placed 30 cm from the table edge in the midline of the body. The drinking task includes reaching, grasping, and lifting the glass from the table and taking a drink (one sip); placing the glass back on the table behind a marked line; and returning to the initial



**Figure 2 Setup of kinematic 5-camera motion capture system for the drinking task.** Participant is presented with the right arm in initial position, and marker sites are shown as black dots.

position. Participants are instructed to sit against the chair back during the whole task, but the sitting position is not restrained, and compensatory movements are allowed. All participants perform the drinking task at a comfortable self-paced speed, starting with their non-affected arm, after practicing a few times. The mean of the three middle trials of total five will be used for statistical calculations. A total of 9 spherical 12-mm retro-reflective markers are placed on the third metacarpophalangeal joint of hand, styloid process of ulna on wrist, lateral epicondyle of elbow, middle part of acromion on right and left shoulder, upper part of sternum, forehead and on the upper and lower edge of the glass. The procedure has been described in more detail previously [53,54].

In the VR test [55], the participant reaches into a virtual space and interacts with 3D objects. The VR equipment consists of a semi-immersive workbench with haptic device and stereoscopic glasses. In our set-up, the haptic equipment looks like a stylus shaped instrument attached to a lever system and it is freely movable in all directions (Figure 3). During the test, the position of the stylus is tracked, and resistive force is applied to the stylus when it comes into contact with the virtual object, providing force feedback. In addition to the visual perception, the haptic device creates an illusion of manipulation and sensation of the virtual objects. The participant moves the stylus in a realistic environment, experiencing the sense of moving inside the computer screen. The precise co-location of haptics is achieved by projecting the virtual image onto the same location as the user's hand through the mirror setup. The VR-test, developed by our group, is a precise quantitative kinematic measurement tool for arm and hand movements





**Figure 3** Participant is performing the VR-test. The VR equipment consists of a semi-immersive workbench with haptic device and stereoscopic glasses.

and has been shown to have a good test retest reliability [31,56,57]. During the test the participant has to move the haptic stylus to 32 different targets in the virtual environment (VE) generated by the computer. The targets appear one after the other and disappear when touched. Each target consists of a whole circle (diameter 3.0 cm viewing angle). The 32 target placements in the VE are random to the subject but are actually set according to a pre-set kinematic scheme for evaluation purposes. In each test occasion the participant have one or two training trails before the measurements starts. Both dominant and non-dominant hand is measured, starting with the non-dominant hand. The participant performs the test as fast as possible.

#### Self-perceived outcomes

ABILHAND [58,59] is a questionnaire aiming to assess manual ability in persons with chronic stroke. It is interview based and focused on perceived difficulties in everyday activities. A Swedish version has been validated [60]. ABILHAND is a Rasch-based assessment; it is unidimensional and can be used as linear measure [58,59].

Stroke Impact Scale (SIS) [61] is a questionnaire on different aspects of the stroke recovery where the person replies on their perception regarding their life after the stroke. The 59 questions are divided into 8 domains; strength, memory, emotion, communication, activities of daily living, mobility, hand function and social participation. Items within the domain are ordered hierarchically based on clinical perspective and Rasch analysis [62]. Only the first four sections are used for the test occasion at day 10.

Impact on Participation and Autonomy (IPA-E) is a generic outcome measure for adults with chronic conditions where the person estimates perceived limitations

in participation and autonomy related to dependency in the current living surrounding [63-65]. The subscales include autonomy indoors, family role, autonomy outdoors, social life and relationships, work and education. Additionally, IPA-E identifies the extent to which limitations in life are experienced as problematic in areas of mobility, self care, activities, economy issues, social life, work and education. IPA-E is valid, reliable and sensitive to change after stroke [63-65].

EuroQol Quality of Life Scale (EQ-5D) will be used to measure the health status related to the quality of life. It is a widely used generic measure and includes five dimensions: mobility, self-care, usual activities, pain/discomfort and anxiety/depression [66,67].

#### Data analysis

The kinematic data in the drinking task is filtered with a 6-Hz second-order Butterworth filter, resulting in zero-phase distortion and fourth-order filtering. The drinking task is broken down into five logical phases: reaching for the glass, forward transport of the glass to the mouth, drinking, back transport of the glass to the table, and returning the hand to the initial position. The selection of kinematic variables and data analysis calculations will be based on our earlier studies [53,54]. Movement onset is defined as the time when the tangential velocity of the hand marker exceeds 2% of the maximum velocity in the reaching phase. Movement offset is detected when the velocity of the hand is less than 2% of the maximum velocity in the returning phase. Start of forward transport phase is defined as the time when the tangential velocity of the glass exceeds 15 mm/s. The drinking phase is identified by a 15% increase or decrease of the steady-state distance between the face and glass marker. The start of the returning phase is defined as the time when the tangential velocity of the glass is less than 10 mm/s. Movement times are calculated for the whole movement and separately for each phase. Peak tangential velocity and angular velocity of the elbow joint are computed for the reaching phase. Smoothness of movement is quantified by computing the number of movement units during the reaching and forward transport phases [53]. Angular joint motions are computed from the 3D position data for elbow flexion/extension, shoulder flexion/extension in the sagittal plane, and abduction/adduction in the frontal plane [53]. Compensatory trunk movement is computed for the entire drinking task as the maximal displacement of the thorax marker from the initial position [53]. Inter-joint coordination between the shoulder and elbow joint angles for reaching phase is computed using cross-correlation analysis of zero time lag [53].

In the VR-test hand position data (haptic stylus endpoint) will be gathered. The position of the stylus is

tracked and resistive force is applied to it when it comes into contact with the virtual model, providing force feedback. All measurements generate time-stamped motion data (x, y, z) at 1000 Hz. Different parameters such as reaction- and movement time, velocity, acceleration and deceleration times are calculated. To obtain the movement quality of the hand trajectory, a hand path ratio, corresponding to the length of the pathway is calculated. The selection of kinematic variables and data analysis calculations will be based on our earlier study [30].

The raw scores from the ABILHAND questionnaire are analyzed using a Rasch analysis computer program and expressed as logistically transformed probability measures, logits [68]. In the Rasch model the raw scores are used to estimate the linear ability for each subject and linear difficulty for each item of measurement around a unidimensional continuum. Thus, the Rasch model converts the ordinal score of subject's manual ability into an equal interval linear measure.

#### Group size/power analysis

Prior longitudinal studies stroke cohorts at Sahlgrenska University Hospital have had a dropout rate of 30%. With a power (1- $\beta$ ) at 0.8 and a significance level ( $\alpha$ ) at 0.05, we need a sample of 88 patients (two-sided test) to determine a medium effect of 6 points change (10%) on ARAT. Therefore, we aim to include 120 persons.

#### Discussion

The SALGOT study is a longitudinal prospective study with a non-selected sample from Gothenburg urban area. A sample of 120 persons with first ever clinical stroke admitted to a stroke unit will be consecutively recruited from Sahlgrenska University Hospital. The study is non-interventional and the main goal is to describe the recovery of upper extremity function after first ever clinical stroke and to follow the improvements and consequences of stroke during the first year in these persons life. Measurements are performed both using traditional clinical assessments as well as computer based measurement systems that provide objective kinematic data. The person's perspective of recovery is captured both with stroke specific as well as generic self-perceived outcome measures.

In this study, the participants are assessed at eight occasions during the first year after stroke. This design gives an opportunity to study which persons will recover, when and in which areas the recovery occurs. From earlier studies it is known that the improvement of function is mostly gained during the first months after stroke. But the majority of these reports have been conducted on selected populations and in many studies the selection of outcome measures on motor function has not been sufficient. Additionally, new technologies

obtaining objective kinematic measures on motor function and performance have been scarcely used in longitudinal studies.

The gained knowledge of recovery patterns is necessary both for the healthcare system and for the individual who has suffered a stroke. Since the rehabilitation resources are limited, there is a need to know the optimal time point for interventions and have guidelines for rehabilitation planning. The more detailed information about the recovery patterns of upper extremity is needed in order to offer individualized assessment and treatment, to inform the patient sufficiently about the recovery perspectives and to enhance the patient's motivation for the rehabilitation period.

#### Abbreviations

ARAT: Action research Arm Test; BNIS: Barrow Neurological Institute Screen for Higher Cerebral Functions; EQ-5D: EuroQol Quality of Life Scale; FMA-UE: Fugl-Meyer Assessment for Upper Extremity; IPA-E: Impact on Participation and Autonomy; M-MAS UAS-95: Modified Motor Assessment Scale accordingly Uppsala Akademiska Sjukhus 95; NIHSS: National Institutes of Health Stroke Scale; SIS: Stroke Impact Scale; TOAST: Trail of Org 10172 in Acute Treatment; VR: Virtual reality; VE: Virtual Environment.

#### Acknowledgements and Funding

This project has been funded in part by the Local Research and Development Board for Gothenburg and Södra Bohuslän, the Regional Research and Development Board for Västra Götaland, the Norrbacka-Eugenia Foundation, Promobilia, the Hjalmar Svensson's Research Foundation, Greta and Einar Askers Foundation, the Foundation of the Swedish National Stroke Association, Rune and Ulla Amlövs Foundation and Inger Bendix Foundation for Medical Research.

#### Authors' contributions

MAM and HCP participated in the conception and design, planning, managing the process and are responsible for day-to-day management of the study. KSS initiated the study, participated in the conception and design, managed the process and drafted the initial manuscript. All authors contributed to the study planning, drafting the manuscript and have approved the final manuscript.

#### Competing interests

The authors declare no competing interests.

Received: 21 March 2011 Accepted: 25 May 2011

Published: 25 May 2011

#### References

1. Riks-Stroke. Årsrapport 2009. The Swedish Stroke register. [<http://www.riks-stroke.org/content/analyser/Rapport09.pdf>], [cited 2011-01-26].
2. Broeks JG, Lankhorst GJ, Rumping K, Prevo AJ: **The long-term outcome of arm function after stroke: results of a follow-up study.** *Disabil Rehabil* 1999, **21**(8):357-364.
3. Nakayama H, Jorgensen HS, Raaschou HO, Olsen TS: **Recovery of upper extremity function in stroke patients: the Copenhagen Stroke Study.** *Arch Phys Med Rehabil* 1994, **75**(4):394-398.
4. Parker VM, Wade DT, Langton Hewer R: **Loss of arm function after stroke: measurement, frequency, and recovery.** *Int Rehabil Med* 1986, **8**(2):69-73.
5. Feys HM, De Weerd WJ, Selz BE, Cox Steck GA, Spichiger R, Vereeck LE, Putman KD, Van Hoydonck GA: **Effect of a therapeutic intervention for the hemiplegic upper limb in the acute phase after stroke: a single-blind, randomized, controlled multicenter trial.** *Stroke* 1998, **29**(4):785-792.
6. Nichols-Larsen DS, Clark PC, Zeringue A, Greenspan A, Blanton S: **Factors influencing stroke survivors' quality of life during subacute recovery.** *Stroke* 2005, **36**(7):1480-1484.

Alt Murphy et al. *BMC Neurology* 2011, **11**:56  
<http://www.biomedcentral.com/1471-2377/11/56>

7. Carr J, Shepherd RB: **Neurological rehabilitation, optimizing motor performance.** Oxford: Butterworth, Heineman; 1998.
8. Kwakkel G, Wagenaar RC, Twisk JW, Lankhorst GJ, Koetsier JC: **Intensity of leg and arm training after primary middle-cerebral-artery stroke: a randomised trial.** *Lancet* 1999, **354**(9174):191-196.
9. Williams BK, Galea MP, Winter AT: **What is the functional outcome for the upper limb after stroke?** *Aust J Physiother* 2001, **47**(1):19-27.
10. Kwakkel G, Kollen B, Lindeman E: **Understanding the pattern of functional recovery after stroke: facts and theories.** *Restor Neural Neurosci* 2004, **22**(3-5):281-299.
11. Dobkin BH: **Confounders in rehabilitation trials of task-oriented training: lessons from the designs of the EXCITE and SCILT multicenter trials.** *Neurorehabil Neural Repair* 2007, **21**(1):3-13.
12. Hendricks HT, van Limbeek J, Geurts AC, Zwarts MJ: **Motor recovery after stroke: a systematic review of the literature.** *Arch Phys Med Rehabil* 2002, **83**(11):1629-1637.
13. Katrak P, Bowring G, Conroy P, Chilvers M, Poulos R, McNeil D: **Predicting upper limb recovery after stroke: the place of early shoulder and hand movement.** *Arch Phys Med Rehabil* 1998, **79**(7):758-761.
14. Verheyden G, Nieuwboer A, De Wit L, Thijs V, Dobbelaere J, Devos H, Severijns D, Vanbeveren S, De Weerd W: **Time course of trunk, arm, leg, and functional recovery after ischemic stroke.** *Neurorehabil Neural Repair* 2008, **22**(2):173-179.
15. Mirbagheri MM, Rymer WZ: **Time-course of changes in arm impairment after stroke: variables predicting motor recovery over 12 months.** *Arch Phys Med Rehabil* 2008, **89**(8):1507-1513.
16. Duncan PW, Goldstein LB, Matchar D, Divine GW, Feussner J: **Measurement of motor recovery after stroke. Outcome assessment and sample size requirements.** *Stroke* 1992, **23**(8):1084-1089.
17. Welmer AK, Holmqvist LW, Sommerfeld DK: **Limited fine hand use after stroke and its association with other disabilities.** *J Rehabil Med* 2008, **40**(8):603-608.
18. Lawrence ES, Coshall C, Dundas R, Stewart J, Rudd AG, Howard R, Wolfe CD: **Estimates of the prevalence of acute stroke impairments and disability in a multiethnic population.** *Stroke* 2001, **32**(6):1279-1284.
19. Mirbagheri MM, Tsao CC, Rymer WZ: **Changes of elbow kinematics and kinetics during 1 year after stroke.** *Muscle Nerve* 2008, **37**(3):387-395.
20. Wagner JM, Lang CE, Sahrman SA, Edwards DF, Dromerick AW: **Sensorimotor impairments and reaching performance in subjects with poststroke hemiparesis during the first few months of recovery.** *Phys Ther* 2007, **87**(6):751-765.
21. Trombly CA, Wu CY: **Effect of rehabilitation tasks on organization of movement after stroke.** *Am J Occup Ther* 1999, **53**(4):333-344.
22. Murphy MA, Sunnerhagen KS, Johnels B, Willen C: **Three-dimensional kinematic motion analysis of a daily activity drinking from a glass: a pilot study.** *J Neuroengineering Rehabil* 2006, **3**:18.
23. Murphy MA, Willén Carin, Sunnerhagen SKatharina: **Kinematic Variables Quantifying Upper-Extremity Performance After Stroke During Reaching and Drinking From a Glass.** *Neurorehabilitation and Neural Repair* 2010, **1**-11.
24. Crosbie JH, Lennon S, McNeill MD, McDonough SM: **Virtual reality in the rehabilitation of the upper limb after stroke: the user's perspective.** *Cyberpsychol Behav* 2006, **9**(2):137-141.
25. Swapp D, Pawar V, Loscos C: **Interaction with co-located haptic feedback in virtual reality.** *Virtual Reality* 2006, **10**(1):24-30.
26. Henderson A, Korner-Bitensky N, Levin M: **Virtual reality in stroke rehabilitation: a systematic review of its effectiveness for upper limb motor recovery.** *Top Stroke Rehabil* 2007, **14**(2):52-61.
27. Boian R, Sharma A, Han C, Merians A, Burdea G, Adamovich S, Recce M, Tremaine M, Poizner H: **Virtual reality-based post-stroke hand rehabilitation.** *Stud Health Technol Inform* 2002, **85**:64-70.
28. Viau A, Feldman AG, McFadyen BJ, Levin MF: **Reaching in reality and virtual reality: a comparison of movement kinematics in healthy subjects and in adults with hemiparesis.** *J Neuroeng Rehabil* 2004, **1**(1):11.
29. Broeren J, Claesson L, Goude D, Rydmark M, Sunnerhagen KS: **Virtual rehabilitation in an activity centre for community-dwelling persons with stroke. The possibilities of 3-dimensional computer games.** *Cerebrovasc Dis* 2008, **26**(3):289-296.
30. Broeren J, Rydmark M, Bjorkdahl A, Sunnerhagen KS: **Assessment and training in a 3-dimensional virtual environment with haptics: a report on 5 cases of motor rehabilitation in the chronic stage after stroke.** *Neurorehabil Neural Repair* 2007, **21**(2):180-189.
31. Broeren J, Sunnerhagen KS, Rydmark M: **A kinematic analysis of a haptic handheld stylus in a virtual environment: a study in healthy subjects.** *J Neuroeng Rehabil* 2007, **4**:13.
32. WHO: **International classification of functioning, disability and health: ICF.** Geneva: WHO Library Cataloguing-in-Publication Data; 2001.
33. Barkeluis K, Johansson A, Korm K, Lindmark B: **Reliabilitets- och validitetsprövning av Modifierad Motor Assessment Scale enligt Uppsala Akademiska Sjukhus -95.** *Nordisk Fysioterapi* 1997, **29**:161-165.
34. Lyle RC: **A performance test for assessment of upper limb function in physical rehabilitation treatment and research.** *Int J Rehabil Res* 1981, **4**(4):483-492.
35. Adams HP Jr, Bendixen BH, Kappelle LJ, Biller J, Love BB, Gordon DL, Marsh EE: **Classification of subtype of acute ischemic stroke. Definitions for use in a multicenter clinical trial. TOAST. Trial of Org 10172 in Acute Stroke Treatment.** *Stroke* 1993, **24**(1):35-41.
36. Bamford J, Sandercock P, Dennis M, Burn J, Warlow C: **Classification and natural history of clinically identifiable subtypes of cerebral infarction.** *Lancet* 1991, **337**(8756):1521-1526.
37. Sangha O, Stucki G, Liang MH, Fossel AH, Katz JN: **The Self-Administered Comorbidity Questionnaire: a new method to assess comorbidity for clinical and health services research.** *Arthritis Rheum* 2003, **49**(2):156-163.
38. Denvall V, Elmstahl S, Prigatano GP: **Replication and construct validation of the Barrow Neurological Institute Screen for Higher Cerebral Function with a Swedish population.** *J Rehabil Med* 2002, **34**(4):153-157.
39. Grimby G: **Physical activity and muscle training in the elderly.** *Acta Med Scand Suppl* 1986, **711**:233-237.
40. Mattiasson-Nilo I, Sonn U, Johannesson K, Gosman-Hedstrom G, Persson GB, Grimby G: **Domestic activities and walking in the elderly: evaluation from a 30-hour heart rate recording.** *Aging (Milano)* 1990, **2**(2):191-198.
41. Fugl-Meyer AR, Jaasko L, Leyman I, Olsson S, Stegling S: **The post-stroke hemiplegic patient. 1. a method for evaluation of physical performance.** *Scand J Rehabil Med* 1975, **7**(1):13-31.
42. Duncan PW, Propst M, Nelson SG: **Reliability of the Fugl-Meyer assessment of sensorimotor recovery following cerebrovascular accident.** *Phys Ther* 1983, **63**(10):1606-1610.
43. van Wijk FM, Pandyan AD, Johnson GR, Barnes MP: **Assessing motor deficits in neurological rehabilitation: patterns of instrument usage.** *Neurorehabil Neural Repair* 2001, **15**(1):23-30.
44. Lyle R: **A performance test for assessment of upper limb function in physical rehabilitation treatment and research.** *Int J Rehabil Res* 1981, **4**(4):483-492.
45. Yozbatiran N, Der-Yeghalian L, Cramer SC: **A standardized approach to performing the action research arm test.** *Neurorehabil Neural Repair* 2008, **22**(1):78-90.
46. Hsieh CL, Hsueh IP, Chiang FM, Lin PH: **Inter-rater reliability and validity of the action research arm test in stroke patients.** *Age Ageing* 1998, **27**(2):107-113.
47. van der Lee JH, Beckerman H, Lankhorst GJ, Bouter LM: **The responsiveness of the Action Research Arm test and the Fugl-Meyer Assessment scale in chronic stroke patients.** *J Rehabil Med* 2001, **33**(3):110-113.
48. Van der Lee JH, De Groot V, Beckerman H, Wagenaar RC, Lankhorst GJ, Bouter LM: **The intra- and interrater reliability of the action research arm test: a practical test of upper extremity function in patients with stroke.** *Arch Phys Med Rehabil* 2001, **82**(1):14-19.
49. Bohannon RW, Smith MB: **Interrater reliability of a modified Ashworth scale of muscle spasticity.** *Phys Ther* 1987, **67**(2):206-207.
50. Gregson JM, Leathley MJ, Moore AP, Smith TL, Sharma AK, Watkins CL: **Reliability of measurements of muscle tone and muscle power in stroke patients.** *Age Ageing* 2000, **29**(3):223-228.
51. Mathiowetz V, Kashman N, Volland G, Weber K, Dowe M, Rogers S: **Grip and pinch strength: normative data for adults.** *Arch Phys Med Rehabil* 1985, **66**(2):69-74.
52. Mathiowetz V, Weber K, Volland G, Kashman N: **Reliability and validity of grip and pinch strength evaluations.** *J Hand Surg Am* 1984, **9**(2):222-226.
53. Murphy MA, Willen C, Sunnerhagen KS: **Kinematic variables quantifying upper-extremity performance after stroke during reaching and drinking from a glass.** *Neurorehabil Neural Repair* 2011, **25**(1):71-80.



Alt Murphy *et al.* *BMC Neurology* 2011, **11**:56  
<http://www.biomedcentral.com/1471-2377/11/56>

54. Murphy MA, Sunnerhagen KS, Johnels B, Willen C: **Three-dimensional kinematic motion analysis of a daily activity drinking from a glass: a pilot study.** *J Neuroeng Rehabil* 2006, **3**:18.
55. Broeren J, Rydmark M, Sunnerhagen KS: **Virtual reality and haptics as a training device for movement rehabilitation after stroke: a single-case study.** *Archives of physical medicine and rehabilitation* 2004, **85**(8):1247-1250.
56. Broeren J, Bjorkdahl A, Pascher R, Rydmark M: **Virtual reality and haptics as an assessment device in the postacute phase after stroke.** *Cyberpsychol Behav* 2002, **5**(3):207-211.
57. Broeren J, Sunnerhagen KS, Rydmark M: **A kinematic analysis of a haptic handheld stylus in a virtual environment: a study in healthy subjects.** *J Neuroengineering Rehabil* 2007, **4**:13.
58. Penta M, Tesio L, Arnould C, Zancan A, Thonnard JL: **The ABILHAND questionnaire as a measure of manual ability in chronic stroke patients: Rasch-based validation and relationship to upper limb impairment.** *Stroke* 2001, **32**(7):1627-1634.
59. Penta M, Thonnard JL, Tesio L: **ABILHAND: a Rasch-built measure of manual ability.** *Arch Phys Med Rehabil* 1998, **79**(9):1038-1042.
60. Gustafsson S, Sunnerhagen K, Dahlin-Ivanoff S: **Occupational therapist's and patients' perception of ABILHAND, a new assessment tool for measuring manual ability.** *Scand J Occup Ther* 2004, **11**:107-117.
61. Duncan PW, Wallace D, Lai SM, Johnson D, Embretson S, Laster LJ: **The stroke impact scale version 2.0. Evaluation of reliability, validity, and sensitivity to change.** *Stroke* 1999, **30**(10):2131-2140.
62. Duncan PW, Bode RK, Min Lai S, Perera S: **Rasch analysis of a new stroke-specific outcome scale: the Stroke Impact Scale.** *Arch Phys Med Rehabil* 2003, **84**(7):950-963.
63. Cardol M, de Haan RJ, de Jong BA, van den Bos GA, de Groot IJ: **Psychometric properties of the Impact on Participation and Autonomy Questionnaire.** *Arch Phys Med Rehabil* 2001, **82**(2):210-216.
64. Cardol M, de Haan RJ, van den Bos GA, de Jong BA, de Groot IJ: **The development of a handicap assessment questionnaire: the Impact on Participation and Autonomy (IPA).** *Clin Rehabil* 1999, **13**(5):411-419.
65. Kersten P, Cardol M, George S, Ward C, Sibley A, White B: **Validity of the impact on participation and autonomy questionnaire: a comparison between two countries.** *Disabil Rehabil* 2007, **29**(19):1502-1509.
66. Rabin R, de Charro F: **EQ-5D: a measure of health status from the EuroQol Group.** *Ann Med* 2001, **33**(5):337-343.
67. Euroqol: **Euro-Qol: a new facility for the measurement of health-related quality of life.** *Health Policy* 1990, **16**:199-208.
68. Rasch G: **Probabilistic models for some intelligence and attainment tests.** Chicago: Chicago University Press; 1980.

#### Pre-publication history

The pre-publication history for this paper can be accessed here:  
<http://www.biomedcentral.com/1471-2377/11/56/prepub>

doi:10.1186/1471-2377-11-56

**Cite this article as:** Alt Murphy *et al.*: SALGOT - Stroke Arm Longitudinal study at the University of Gothenburg, prospective cohort study protocol. *BMC Neurology* 2011 **11**:56.

**Submit your next manuscript to BioMed Central and take full advantage of:**

- Convenient online submission
- Thorough peer review
- No space constraints or color figure charges
- Immediate publication on acceptance
- Inclusion in PubMed, CAS, Scopus and Google Scholar
- Research which is freely available for redistribution

Submit your manuscript at  
[www.biomedcentral.com/submit](http://www.biomedcentral.com/submit)

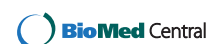



# BMJ Open

## Early prediction of physical activity level one year after stroke, a longitudinal cohort study.

|                                 |                                                                                                                                                                                                                                                                                                                   |
|---------------------------------|-------------------------------------------------------------------------------------------------------------------------------------------------------------------------------------------------------------------------------------------------------------------------------------------------------------------|
| Journal:                        | <i>BMJ Open</i>                                                                                                                                                                                                                                                                                                   |
| Manuscript ID                   | bmjopen-2017-016369.R2                                                                                                                                                                                                                                                                                            |
| Article Type:                   | Research                                                                                                                                                                                                                                                                                                          |
| Date Submitted by the Author:   | 12-Jun-2017                                                                                                                                                                                                                                                                                                       |
| Complete List of Authors:       | Olsson, Ola; Univ of Gothenburg, Inst of Neuroscience and Physiology<br>Persson, Hanna; Univ of Gothenburg, Inst of Neuroscience and Physiology<br>Alt Murphy, Margit; Univ of Gothenburg, Inst of Neuroscience and Physiology<br>Sunnerhagen, Katharina; Univ of Gothenburg, Inst of Neuroscience and Physiology |
| <b>Primary Subject Heading</b>: | Rehabilitation medicine                                                                                                                                                                                                                                                                                           |
| Secondary Subject Heading:      | Neurology                                                                                                                                                                                                                                                                                                         |
| Keywords:                       | Stroke < NEUROLOGY, Physical activity, Motor activity, Prognosis, Outcome Assessment                                                                                                                                                                                                                              |
|                                 |                                                                                                                                                                                                                                                                                                                   |

SCHOLARONE™  
Manuscripts

**TITLE PAGE**

Early prediction of physical activity level one year after stroke, a longitudinal cohort study.

Author's: Ola A Olsson MD, PT, MSc, Hanna C Persson PT, PhD, Margit Alt Murphy PT, PhD, Katharina S Sunnerhagen MD, PhD.

Author's affiliations: Department of clinical neuroscience, Institute of Neuroscience and Physiology, Sahlgrenska Academy at University of Gothenburg, Gothenburg, Sweden.

Correspondence: Katharina S Sunnerhagen, Rehabilitation medicine, Sahlgrenska university hospital, Per Dubbsgatan 14, 3<sup>rd</sup> floor, 413 45 Gothenburg, SWEDEN

+46-31-342 2803, e-mail: ks.sunnerhagen@neuro.gu.se

Key words: Stroke, Physical activity, Motor activity, Prognosis, Outcome Assessment

Number of words: 3820 including tables

## ABSTRACT

**Objective:** To investigate which variables present prior and early after stroke may have an impact on the level of physical activity one-year post stroke.

**Design:** Prospective longitudinal cohort and logistic regression analysis.

**Setting:** Stroke Unit at Sahlgrenska University Hospital, Gothenburg, Sweden.

**Participants:** 117 individuals as part of the Stroke Arm Longitudinal study (SALGOT) admitted to the stroke unit during a period of 18 months were consecutively recruited. The inclusion criteria were: first-time stroke, impaired upper-extremity function, admitted to the stroke unit within 3 days since onset, local residency,  $\geq 18$  years old. The exclusion criteria were: upper extremity condition or severe multi-impairment prior to stroke, short life-expectancy, non-Swedish speaking. 77 participants followed-up at one year post stroke were included in the analysis.

**Primary outcome:** Physical activity level one year after stroke was assessed using a 6-level Saltin-Grimby scale, which was first dichotomized into mostly inactive or mostly active, and secondly into low or moderate/high level of physical activity.

**Results:** Being mostly inactive one year after stroke could be predicted by age at stroke onset (OR 1.07, 95% CI 1.00-1.13,  $p=0.041$ ), functional dependency at discharge (OR 7.01, 95% CI 1.73-28.43,  $p=0.006$ ) and pre-stroke physical activity (OR 7.46, 95% CI 1.51-36.82,  $p=0.014$ ). Having a low level of physical activity one year after stroke could be predicted by age at stroke onset (OR 1.13, 95% CI 1.06-1.21,  $p<0.001$ ) and functional dependency at discharge (OR 3.62, 95% CI 1.09-12.04,  $p=0.036$ ).

**Conclusions:** Previous low level of physical activity, older age and functional dependency all provided value in predicting low physical activity one year after stroke. These results indicate that age and simple clinical evaluations early after stroke may be useful to help clinicians identify persons at risk of being insufficiently active after stroke. Further research is needed to clarify if these findings may apply to the large population of stroke-survivors.

**Clinical trial registration:** Clinical Trial Registration-URL: <http://www.clinicaltrials.gov>.  
Unique identifier: NCT01115348

## Strengths and limitations of the study

- Clinically important parameters prior to, and early after stroke were included
- Longitudinal consecutively recruited cohort study with one year follow-up time
- Clinically relevant dichotomization of physical activity levels produced interpretable data
- Despite relatively large cohort, the number of included predictors was limited due to small number of cases for some variables
- Persons with minor stroke showing no upper-extremity impairment early after stroke were not included

## INTRODUCTION

Low physical activity (PA) has shown to be an independent risk factor for stroke<sup>1-3</sup> and PA is a part of primary<sup>1</sup> as well as secondary prevention in most of the stroke guidelines<sup>4</sup>. The World Health Organization (WHO) has identified physical inactivity to be the fourth leading risk factor for overall global mortality<sup>5</sup>. The definition of PA according to WHO is "any bodily movement produced by skeletal muscles that requires energy expenditure – including activities undertaken while working, playing, carrying out household chores, travelling, and engaging in recreational pursuits"<sup>6</sup>. Higher PA level pre-stroke may predict a less severe stroke<sup>7 8</sup>, decrease the overall risk for death from first time stroke<sup>9</sup> and is associated with a better functional status post stroke<sup>7 10 11</sup>.

It is a complex question to answer why some people are physically active after having a stroke and others are not. PA in healthy populations has shown to be influenced by factors such as age, gender, motivation, previous PA, self-efficacy and health status<sup>12 13</sup>. Being physically active post-stroke is associated with a better quality of life and has a positive correlation to functional ability<sup>14</sup>. The PA level among stroke-survivors has been shown to be significantly lower than in a healthy reference-population<sup>15-19</sup> and correlates with walking ability, balance and physical fitness<sup>15</sup>, but cannot be explained by motor disability alone<sup>16 20</sup>. Barriers to PA reported by stroke survivors include lack of motivation, fear of falling, inaccessibility to training centers and physical impairments<sup>21 22</sup>. It is, however, not clear to what extent factors connected to the pre-stroke lifestyle and medical status may be associated with the PA level among stroke survivors. Identifying persons at risk of being inadequately active post stroke may help to target specific interventions for this group at an early stage. The purpose of this study was to investigate which possible pre-stroke and early predictor variables may impact the level of PA one year after the first time stroke.

## MATERIALS AND METHODS

### Population and data collection

This longitudinal study is a part of the Stroke Arm Longitudinal study at the University of Gothenburg (SALGOT)<sup>23</sup>, with the original purpose to describe upper extremity functioning after stroke. Over a period of eighteen months, in 2009-2010, consecutively, every person who met the criteria was included to the SALGOT-study from one of the largest out of three comprehensive Stroke Units at the Sahlgrenska University Hospital, Gothenburg. The following inclusion criteria were used: 1) first-time stroke according to International Classification of Diseases codes I61 intracerebral hemorrhage or I63 ischemic stroke; 2) impaired upper-extremity function, defined as not achieving the maximal points at the Action Research Arm Test (ARAT)<sup>24</sup> three days post-stroke; 3) admitted to the Stroke Unit within three days since stroke onset; 4) residency in the Gothenburg urban area, within 35km from the hospital; 5)  $\geq 18$  years of age. The exclusion criteria were: 1) an upper extremity injury/condition prior to stroke; 2) severe multi-impairments or diminished physical condition prior to stroke; 3) short life-expectancy; 4) non-Swedish speaking. Three experienced physiotherapists performed all clinical assessments according to a standardized protocol<sup>23</sup>. In SALGOT, the patients were assessed at admission and discharge as well as at 3 and 10 days, at 3, 4, and 6 weeks; and at 3, 6 and 12 months poststroke. In the current study, data from admission, discharge, 3 days and 12 months were used. Most assessments were performed at the hospital and only at persons' home or nursing home when the participant was unable to travel. Prior power analysis for SALGOT to determine a minimum of 6 points change on ARAT (statistical power of 0.8,  $\alpha$  0.05) and considering a 30% dropout rate indicated that a sample size of 114 was needed. From a total cohort of 763 persons, 117 were included in the SALGOT study, and 77 still remained in the study at one year post stroke (fig.1). The main reason for not being assessed at one year was death (n=14) (fig 1). The

study was approved by The Regional Ethical Review Board in Gothenburg (225-08). All participants or their next of kin gave written informed consent. The STROBE-guidelines for reporting observational data were followed<sup>25</sup>.

### Potential predictor variables

Potential predictors prior and close to the stroke onset, theorized to have impact on PA, were considered for model building<sup>12 13 15</sup>. Prior stroke predictor variables included in the analyses were: smoking, living alone, TIA, diabetes, atrial fibrillation, treatment for high blood pressure and PA level. Other predictors included were: age, gender, type of stroke, stroke severity, upper extremity functioning three days post stroke and functional dependency at discharge (mRS), shown in Table 1.

Table 1. Demographics, clinical characteristics and considered predictor variables.

| Demographic and clinical characteristics n=77                |             |
|--------------------------------------------------------------|-------------|
| Age at stroke onset, years, mean (SD)                        | 67.2 (11.9) |
| Men, n (%)                                                   | 46 (59.7)   |
| Hemorrhagic stroke <sup>2</sup> , n (%)                      | 11 (14.3)   |
| Smoking <sup>1, 2</sup> , n (%), n=76                        | 18 (23.7)   |
| Living alone <sup>1</sup> , n (%)                            | 31 (40.3)   |
| TIA/Amaurosis Fugax <sup>1, 2</sup> , n (%), n=76            | 4 (5.3)     |
| Diabetes <sup>1, 2</sup> , n (%)                             | 10 (13)     |
| Atrial Fibrillation <sup>1, 2</sup> , n (%), n=76            | 11 (14.5)   |
| Treatment for high blood pressure <sup>1</sup> , n (%), n=76 | 26 (34.2)   |
| NIHSS at admission, median (q1-q3)                           | 7 (3-12.5)  |
| ARAT at three days, median (q1-q3), n=74                     | 7 (0-47)    |
| mRS at discharge from Stroke Unit, n (%).                    |             |
| independent walkers (grade 0-3)                              | 37 (48.1)   |
| unable to walk independently (grade 4-5)                     | 40 (51.9)   |
| Pre-stroke PA, n (%), n=73                                   |             |
| mostly inactive (grade 1-2)                                  | 19 (26.0)   |
| low (grade 1-3)                                              | 43 (58.9)   |
| Acute hospital stay, days, mean (SD)                         | 12.6 (7.1)  |
| Discharge to post-acute hospital stay, days, n (%)           |             |
| Ordinary home                                                | 27 (35)     |
| In-hospital rehabilitation unit                              | 46 (60)     |
| Nursing home                                                 | 4 (5)       |

<sup>1</sup> = prior to stroke, <sup>2</sup> = not included in the prediction models due to too few observations

1  
2  
3 *Abbreviations: SD= Standard Deviation, y/n=yes/no, TIA=Transient Ischemic Attack,*  
4 *NIHSS=National Institute of Stroke Scale, ARAT=Action Research Arm Test, mRS=modified*  
5 *Rankin Scale, PA=Physical Activity, q1-q3=1<sup>st</sup> to 3<sup>rd</sup> quartile.*  
6

7 Information of history of smoking, whether the participant shared livings with another adult  
8 and medical history prior to stroke were acquired by the national Swedish Stroke Register<sup>26</sup> or  
9 medical charts. The stroke severity at admission to the hospital was assessed using the  
10 National Institute of Health Stroke Scale (NIHSS)<sup>27</sup>. The upper extremity functioning was  
11 assessed using the ARAT, which includes 19 items scored on a 4-grade ordinal scale, with a  
12 total score varying from 0-57 points, where a higher score indicates less limitation<sup>24</sup>. The  
13 functional dependency at discharge from the stroke u(mean time 13 days, SD=7,4 range 1-42)  
14 was assessed using the modified Rankin Scale (mRS)<sup>28</sup>. The mRS is an ordinal scale ranging  
15 from 0 to 6 where lower numbers indicates less dependency<sup>28</sup>. The mRS was dichotomized  
16 between the grade 3 and 4 creating one group that contained persons able to walk without  
17 assistance (no/slight/moderate disability, grades 1-3) and one group who could not  
18 (moderately severe to severe disability, grades 4-5). The self-reported PA level was recorded  
19 using a 6-level scale for classification of physical activity level (including leisure-time,  
20 occupational and household activities) (appendix A), originally developed from the 4 graded  
21 Saltin-Grimby scale<sup>29 30</sup>. The participants' PA level was scored through an interview within  
22 three days and at one year post stroke considering the PA level during the previous six  
23 months. In the statistical analyses, the PA was dichotomized in two different ways. First, to  
24 mostly inactive (grade 1-2) or mostly active (grade 3-5) and; secondly, to low (grade 1-3) or  
25 moderate/high activity level (4-5). The first dichotomization was selected to match the  
26 original 4-level scale based upon prevention of cardiovascular disease<sup>31</sup>. The second  
27 dichotomization was selected to match the level of physical activity (of 30 minutes of activity,  
28 5 days per week) recommended by the WHO in order to prevent morbidity<sup>6</sup>. Within each  
29  
30  
31  
32  
33  
34  
35  
36  
37  
38  
39  
40  
41  
42  
43  
44  
45  
46  
47  
48  
49  
50  
51  
52  
53  
54  
55  
56  
57  
58  
59  
60



1  
2  
3 prediction model, the same dichotomization of PA level was used for outcome and for  
4  
5 predictor variable.  
6  
7  
8  
9

## 10 Statistics

11  
12 Differences between groups were investigated with Fishers exact test, Mann-Whitney U test  
13 or t-test depending on data level. Demographic data was presented with medians and  
14 percentiles or means and standard deviation (SD). The statistically significant level was set to  
15  $p < 0.05$  unless stated otherwise. A multivariate logistic regression was used to investigate  
16 which predictor variables may impact on the PA level one year after stroke. Two separate  
17 models were built, one for each dichotomization of the outcome variable. As first step in  
18 selection of potential predictor variables for the regression models, the cross tabulation was  
19 used to identify and exclude predictor variables with less than 5 observations in any subgroup.  
20  
21 Collinearity between predictor variables was checked for using Spearman's rank correlation  
22 test for ordinal variables or Likelihood Ratio test for binary variables. Variables with  
23 correlation above 0.7 were considered for collinearity. Second step was a series of univariate  
24 logistic regression analysis was performed on all variables not excluded by the crosstabulation  
25 in order to identify significant variables for further analyzes (significance level  $p < 0.25$ , tested  
26 with Wald's test). Third, the variables that were significant in the univariate step was put in  
27 multivariate models, built on the enter method in which all predictor variables not reaching  
28 the significance level of 0.05 were ruled out. Individuals with missing data on any of the  
29 variables included in the final multivariate models were excluded for analysis (Table 1).  
30  
31 Fourth, all of the previously ruled out variables were then re-inserted in the final model one  
32 by one to check for possible significant effect in the model ( $p < 0.05$ , Likelihood Ratio test).  
33  
34 Finally, the models were analyzed with the Likelihood Ratio test, percent of correct  
35 classification, Nagelkerke  $R^2$  and the Hosmer and Lemeshow goodness of fit test. Results are  
36  
37  
38  
39  
40  
41  
42  
43  
44  
45  
46  
47  
48  
49  
50  
51  
52  
53  
54  
55  
56  
57  
58  
59  
60

1  
2  
3 presented as Odds-Ratio (OR) with 95% confidence interval (CI). Data was analyzed using  
4  
5 the Statistical Package for Social Sciences (SPSS) software (IBM SPSS Statistics for Mac,  
6  
7 Version 23.0. Armonk, NY: IBM Corp.)  
8  
9

## 10 11 12 13 **RESULTS**

### 14 15 16 **Clinical characteristics**

17  
18 The group of non-participants not assessed at one year from the SALGOT cohort (n=40) was  
19  
20 older (mean difference 6.23 years, p=0.01), had a higher incidence of atrial fibrillation  
21  
22 (p=0.04) and were less active prior to their stroke (p=0.03). No other statistical significant  
23  
24 differences were found between the groups. Demographic and clinical characteristics are  
25  
26 presented in table 1. Prior to stroke, 74% (n=54) of the participants were considered to be  
27  
28 mostly active, in contrast to 61% (n= 47) at one year post stroke. Similarly, 41% (n=30) of the  
29  
30 participants had a moderate to high activity level prior to stroke in contrast to 34% (n=26) one  
31  
32 year later.  
33  
34  
35  
36  
37  
38

### 39 40 **Selection of predictor variables**

41  
42 The type of stroke along with smoking, TIA, diabetes and atrial fibrillation prior to stroke contained  
43  
44 too few individuals in subgroups and were therefore not included into further analysis. Strong  
45  
46 significant collinearity was found between the predictor variables: mRS and ARAT (-0.74). These two  
47  
48 variables were therefore entered into separate models and their impact to respective model compared.  
49  
50 Thus, seven possible predictor variables were considered to be entered in the multivariate models in  
51  
52 this second step. Likelihood Ratio Test showed a significant correlation between gender and pre-  
53  
54 stroke PA (LRT=5.910, p=0.02 and between treatment for high blood pressure prior to stroke and pre-  
55  
56 stroke PA (LRT= 10.358, p=0.01). The results from the univariate analysis are presented in an online  
57  
58  
59  
60

supplementary table (appendix B). None of the variables that were re-inserted in the final step for the multivariate analysis were significant ( $p>0.05$ ).

### Predicting being mostly inactive

The final model for predicting being mostly inactive post stroke included three significant predictor variables: age, functional dependency (mRS) and pre-stroke PA (table 2a).

*Table 2. Logistic Regression models for predicting physical activity level one year post stroke; a) dependent variable of mostly inactive (n=73); b) dependent variable of low level of physical activity (n=77).*

| <b>2a</b>                    |          |            |                        |           |          |                    |
|------------------------------|----------|------------|------------------------|-----------|----------|--------------------|
| <b>Coefficient</b>           | <b>B</b> | <b>S.E</b> | <b>Wald's</b>          | <b>df</b> | <b>P</b> | <b>OR (95% CI)</b> |
| <b>Constant</b>              | -6.52    | 2.15       | 9.17                   | 1         | 0.002    | 0.001              |
| <b>Age</b>                   | 0.06     | 0.03       | 4.18                   | 1         | 0.041    | 1.07 (1.00-1.13)   |
| <b>mRS at discharge</b>      | 1.95     | 0.71       | 7.43                   | 1         | 0.006    | 7.01 (1.73-28.43)  |
| <b>Pre-stroke PA</b>         | 2.01     | 0.81       | 6.10                   | 1         | 0.014    | 7.46 (1.51-36.82)  |
| <b>(mostly inactive)</b>     |          |            |                        |           |          |                    |
| <b>Test</b>                  |          |            | <b>chi<sup>2</sup></b> | <b>df</b> | <b>P</b> |                    |
| <b>Likelihood Ratio Test</b> |          |            | 32.59                  | 3         | <0.001   |                    |
| <b>Hosmer and Lemeshow</b>   |          |            | 9.66                   | 8         | 0.290    |                    |
| <b>2b</b>                    |          |            |                        |           |          |                    |
| <b>Constant</b>              | -8.12    | 2.25       | 13.03                  | 1         | <0.001   | <0.001             |
| <b>Age</b>                   | 0.13     | 0.03       | 13.52                  | 1         | <0.001   | 1.13 (1.06-1.21)   |
| <b>mRS at discharge</b>      | 1.29     | 0.61       | 4.41                   | 1         | 0.036    | 3.62 (1.09-12.04)  |
| <b>Test</b>                  |          |            | <b>chi<sup>2</sup></b> | <b>df</b> | <b>P</b> |                    |
| <b>Likelihood Ratio Test</b> |          |            | 30.47                  | 2         | <0.001   |                    |

|                   |      |   |       |
|-------------------|------|---|-------|
| <b>Hosmer and</b> | 3.28 | 7 | 0.858 |
| <b>Lemeshow</b>   |      |   |       |

*Dependent variable coded as a) mostly active=0, mostly inactive=1; b) moderate/high PA=0, low PA=1; Cox & Snell  $R^2$  a) = 0.360; b) = 0.327 Nagelkerke  $R^2$  a) = 0.489; b) = 0.453*  
*Abbreviations: OR=Odds Ratio, S.E=Standard Error, df=Degrees of freedom PA=Physical Activity, mRS=modified Rankin Scale*

The percentage of total correctly classified for the model was 78.1 with sensitivity 75.0% and specificity of 79.5%. The odds for being mostly inactive one year after stroke, increased by 7% for every year of increasing age. The odds for being inactive also increased by 6 times if the participant was not able to walk independently at discharge and by 6.5 times if the participant was already mostly inactive pre-stroke. Predicted probabilities for this model are presented in Figure 2. As seen in Figure 2, there were no observations on mostly inactive non-walkers below age 70, which means that the predicted probabilities are extrapolated below this age. A separate model including the three significant predictor variables, age, ARAT (instead of mRS) and pre-stroke PA demonstrated comparable level of correct classification (78.6%).

### **Predicting low physical activity**

The final model for predicting low PA level included two significant predictor variables: age and functional dependency (mRS) at discharge from Stroke Unit (table 2b).

The percentage of total correctly classified for the model was 74.0 with sensitivity 77.2% and specificity of 65.0%. The odds of having a low PA level one year after stroke increased with 13% for every year of increasing age. The odds of having a low PA level also increased, by 2.6 times if the participant was not able to walk independently at discharge. Predicted probabilities for this model are presented in Figure 3. A separate model including the two

1  
2  
3 significant predictor variables, age and ARAT (instead of mRS) demonstrated comparable  
4  
5 level of correct classification (75.7%).  
6  
7  
8  
9

## 10 DISCUSSION

11  
12 Higher age, functional dependency at discharge from stroke unit and being physically inactive  
13 prior to stroke all contributed to increase the probability of being physically inactive one year  
14 after stroke. The probability of having a low PA level after stroke increased with older age  
15 and functional dependency at discharge from stroke unit. Findings from this study provide  
16 new insights on what factors obtained early after stroke may impact on the PA level at later  
17 stages among stroke survivors. This knowledge could be used to identify patients at risk for  
18 inactivity or low PA level early after stroke, so that targeted intervention could be offered as  
19 part of secondary prevention.  
20  
21  
22  
23  
24  
25  
26  
27  
28  
29  
30  
31  
32

33 When comparing levels of physical activity two different dichotomizations of data (two  
34 models), based on different recommendations on physical activity was used<sup>6,29</sup>. The first  
35 model aimed to address inactivity as important cut-off for prevention of cardiovascular  
36 disease<sup>31</sup> and the second to address PA at lower than the recommended level required for  
37 prevention of morbidity<sup>6</sup>. Age was found to be a significant predictor in both models, but it  
38 had a greater impact on the model for identifying those with low PA level. This finding is in  
39 concurrence with an earlier study in older adults, where the age was inversely correlated with  
40 the amount of moderate-intensity PA, but not with the amount of low-intensity PA<sup>32</sup>.  
41  
42  
43  
44  
45  
46  
47  
48  
49

50 Functional dependency including ability to walk independently or not, was also found as a  
51 significant predictor for physical activity after stroke in both models, which is in concurrence  
52 with previous studies<sup>15,21</sup>. These findings suggest that, similarly to older adults, age may have  
53 an impact on the intensity of PA after stroke, but also that the disability level expressed as  
54  
55  
56  
57  
58  
59  
60

1  
2  
3 dependence in walking and daily activities influence the PA level at later stages post stroke.  
4  
5 The upper extremity functioning (ARAT) early after stroke was found to have similar effect  
6  
7 on the later post stroke PA, as the functional dependency (mRS) at discharge. Functional  
8  
9 dependency at discharge and limitation in the upper extremity use early after stroke may both  
10  
11 be associated with to the stroke severity, but these factors may also mean that the limited  
12  
13 function itself after stroke may impact the PA level negatively<sup>15-19</sup>. Being mostly inactive pre-  
14  
15 stroke had a significant effect when predicting inactivity at later stage post-stroke. However,  
16  
17 the level of PA pre-stroke, low or moderate/high, did not have a significant effect in the  
18  
19 model predicting post stroke PA level, which indicates that the level of PA post stroke may to  
20  
21 larger degree be affected by other factors, such as the disability level, age and co-morbidities.  
22  
23  
24  
25  
26

27  
28 There has been little interest in investigating which early predictors might influence PA  
29  
30 among stroke-survivors and most studies on PA look at cross-sectional correlations. A  
31  
32 previous longitudinal study<sup>33</sup> investigating physical inactivity after stroke, found significant  
33  
34 correlation between time spent upright and degree of independence in activities of daily living  
35  
36 and walking at the first weeks after stroke, as well as at 1, 2 and 3 years post stroke. Although  
37  
38 these findings reflect merely cross-sectional correlations, they indicate that independence in  
39  
40 daily activities and ambulation are important for PA among stroke-survivors. In a review  
41  
42 comprising people after stroke with ability to walk,<sup>15</sup> walking ability, balance and physical  
43  
44 fitness were positively associated with PA level. Walking ability in the form of walking speed  
45  
46 has further been found to explain some of the variation of PA level among stroke-survivors<sup>16</sup>.  
47  
48  
49 Studies on what stroke-survivors experience as barriers to PA have identified physical  
50  
51 impairment as one of the main barriers to PA<sup>21 22</sup>, yet motor impairment have been found to  
52  
53 correlate mainly with walking capacity and energy cost for walking and not with PA level<sup>17</sup>.  
54  
55  
56 In another study physical capacity, measured by a test for fitness, was found to have a  
57  
58  
59  
60

1  
2  
3 moderate correlation to self-assessed PA<sup>34</sup>. In our study the mRS-scale addressing disability  
4 rather than impairment was used<sup>28</sup> and although functional disability and motor impairment  
5 are correlated, impairment does not fully explain disability among people with stroke<sup>20</sup>.  
6  
7

8  
9 Previous studies have not shown significant correlation between age and PA after stroke<sup>15 33</sup>.  
10 Age has, however, been found to be inversely correlated to PA in healthy populations<sup>12 35</sup>,  
11 although not as a clear determinant compared to health status or previous PA habits<sup>12</sup>. The  
12 decline in PA with increasing age does not seem to be linear but exponential in older adults<sup>35</sup>  
13 and functional outcome has been found to drop steeply in the older ages among people that  
14 has had with stroke<sup>36</sup>, yet most work on PA among stroke-survivors have been made in  
15 persons aged 65 to 75 years<sup>15</sup>. The present study had no upper limit of age, yet the participants  
16 in the study were somewhat younger than the average stroke-population in Sweden<sup>26</sup>,  
17 therefore, the effect of age on PA level in stroke-survivors might be slightly underestimated.  
18  
19

20 Pre-stroke PA has been found to have a significant impact on functional outcome at acute  
21 phase<sup>11</sup>, 3 months<sup>10 19</sup>, one year<sup>11</sup> and two years after stroke<sup>7</sup>. A longitudinal study<sup>11</sup> showed  
22 that the main differences for functional outcome were found when comparing a subgroup with  
23 relatively low PA level, measured as people who walked less than 30 minutes per day with  
24 groups walking for more than 30 minutes a day. The group with low amount of walking time  
25 was more dependent as measured by the mRS-scale and the Barthel Index and had a slower  
26 walking speed. These differences were not seen when comparing one group that walked for  
27 30-60 minutes per day with another group who walked for more than 60 minutes per day<sup>11</sup>.  
28  
29

30 These results are in line with the findings in our study showing that being mostly active, as  
31 analyzed in the first model, was important for staying active, whilst a higher PA level made  
32 no further contribution in predicting a higher PA level post stroke. Pre-stroke habits of PA  
33 may also possibly mean having some knowledge about PA and its beneficial health effects,  
34 while lack of knowledge and disbeliefs related to PA have been reported as barriers to PA by  
35  
36  
37  
38  
39  
40  
41  
42  
43  
44  
45  
46  
47  
48  
49  
50  
51  
52  
53  
54  
55  
56  
57  
58  
59  
60

1  
2  
3 stroke-survivors<sup>21 22</sup> and could be a part of the explanation of our finding that pre-stroke PA  
4  
5 level is important for being active after stroke.  
6  
7

8  
9  
10 The strength of this study was that many clinically important parameters that can be obtained  
11  
12 early post stroke were considered as potential predictors for long-term outcome of PA level. It  
13  
14 is of clinical importance to identify persons at risk of becoming inactive at an early stage,  
15  
16 since PA after stroke may help in preventing secondary complications<sup>4</sup>. Furthermore the  
17  
18 dichotomizations for PA level used in the study are clinically relevant and concurrent with  
19  
20 recommendations for prevention of morbidity. There are, however, several limitations to this  
21  
22 study, including a low number of cases in some subgroups that did not allow inclusion of all  
23  
24 potential predictor variables into the regression models. The main outcome variable for PA  
25  
26 was an interview based questionnaire<sup>29 30</sup>. This type of scale presents with some problems  
27  
28 including being at an ordinal level of data and the risk for recall bias<sup>37</sup>. There is only a limited  
29  
30 number of studies investigating validity of the 6-graded scale used in this study<sup>38</sup>. The  
31  
32 dichotomization used in the first model between grade 2 and 3 may, however, be directly  
33  
34 translated into the original 4-grade Saltin-Grimby scale<sup>29 30</sup>, which has been widely used and  
35  
36 shown to have a good concurrent validity<sup>38</sup>. Self-assessed PA has also been shown to have  
37  
38 good predictor value for cardiovascular risk profiles<sup>39</sup> as well as for functional outcome after  
39  
40 stroke<sup>19</sup>. The alternative option for reporting PA is direct measurement, e.g. through using  
41  
42 accelerometers<sup>37</sup>. This option would not have been possible for establishing PA level prior to  
43  
44 stroke, but could have been for outcome.  
45  
46  
47

48  
49 There are several other variables, such as mood, balance scales<sup>40</sup>, fear of falling<sup>20</sup> lack of  
50  
51 motivation and environmental factors<sup>21</sup> that may influence PA after stroke that were not taken  
52  
53 into account in the current study. Furthermore, our study based on the SALGOT cohort  
54  
55 included only persons with an impaired upper extremity function three days post stroke, and  
56  
57  
58  
59  
60



1  
2  
3 the results apply only to those who were followed-up at one year.. Persons without impaired  
4  
5 upper extremity might experience other obstacles for being physically active than people with  
6  
7 upper limb impairment. Thus the results from the current study can only be applied to persons  
8  
9 showing at least some impairment of the upper extremity early after stroke and other studies  
10  
11 are needed to see if the findings in our study may also apply to persons without upper  
12  
13 extremity impairment early after stroke.  
14

15  
16 The present study aimed to identify persons that have a higher risk in becoming inactive after  
17  
18 their stroke. The problem of inactivity amongst people with stroke is well established and  
19  
20 recent recommendations have highlighted the challenges in increasing the physical activity  
21  
22 amongst this group<sup>4</sup>. By identifying which individuals that have an increased risk of  
23  
24 becoming inactive after their stroke, allows clinicians to identify these persons earlier and so  
25  
26 that targeted intervention could be offered as part of secondary prevention<sup>4</sup>.  
27  
28  
29

## 30 31 CONCLUSION

32  
33 Physical inactivity among stroke survivors is a major clinical problem. The present study  
34  
35 indicates that persons with a higher age, higher degree of functional dependency early after  
36  
37 stroke and a history of inactivity prior to stroke may have an increased risk of being  
38  
39 insufficiently active at one year post stroke. These results may help to guide clinicians in  
40  
41 identifying individuals in need of targeted interventions for reaching an adequate amount of  
42  
43 PA, however, these findings need to be validated by other studies to show if the results may  
44  
45 be applicable for other groups of stroke-survivors. The list of predictor variables identified in  
46  
47 this study contribute, but cannot explain all of the variation of PA level among stroke-  
48  
49 survivors and other predictors need to be further explored.  
50  
51  
52  
53  
54  
55  
56  
57  
58  
59  
60

**Online supplements:**

Appendix A: Scale for physical activity

Appendix B: Supplementary table of univariate logistic regression

**Acknowledgment:** The authors thank Eva-Lena Bustrén for data collection and the Riks-stroke Collaboration for help with baseline data.

**Contributors:** OAO, HCP, MAM, KSS contributed to the design of the study concept, in analysis and interpretation of results and in drafting/revising the manuscript for content. All authors have read and approved the final manuscript. In addition to this HCP and MAM performed the acquisition of data, HCP, MAM and KSS obtained funding, OAO performed the statistical analysis and KSS supervised the SALGOT-study.

**Funding:** This study was funded in parts by the Swedish Research Council (VR 2012-70X-22122-01-3), the Norrbacka Eugenia Foundation, the Foundation of the Swedish National Stroke Association, Promobila, the Swedish Brain Foundation and the Swedish Heart-Lung Foundation.

**Competing interest:** The authors declare that they have no competing interests.

**Data Sharing:** Interested researchers may submit requests for data to the authors (contact [ks.sunnerhagen@neuro.gu.se](mailto:ks.sunnerhagen@neuro.gu.se)). According to the Swedish regulation (<http://www.epn.se/en/start/regulations/>) the permission to use data is only for what has been applied for and then approved by the Ethical board.

## REFERENCES

1. O'Donnell MJ, Xavier D, Liu L, et al. Risk factors for ischaemic and intracerebral haemorrhagic stroke in 22 countries (the INTERSTROKE study): a case-control study. *Lancet* 2010;376(9735):112-23. doi: 10.1016/S0140-6736(10)60834-3
2. Lee CD, Folsom AR, Blair SN. Physical activity and stroke risk: a meta-analysis. *Stroke* 2003;34(10):2475-81. doi: 10.1161/01.STR.0000091843.02517.9D
3. Wendel-Vos GC, Schuit AJ, Feskens EJ, et al. Physical activity and stroke. A meta-analysis of observational data. *Int J Epidemiol* 2004;33(4):787-98. doi: 10.1093/ije/dyh168
4. Billinger SA, Arena R, Bernhardt J, et al. Physical activity and exercise recommendations for stroke survivors: a statement for healthcare professionals from the American Heart Association/American Stroke Association. *Stroke* 2014;45(8):2532-53. doi: 10.1161/STR.0000000000000022
5. World Health Organization. Global health risks: mortality and burden of disease attributable to selected major risks. . Geneva, 2009.
6. WHO: global recommendations on physical activity for health 2010 [Available from: [http://apps.who.int/iris/bitstream/10665/44399/1/9789241599979\\_eng.pdf](http://apps.who.int/iris/bitstream/10665/44399/1/9789241599979_eng.pdf) accessed August 19th 2015.
7. Krarup LH, Truelsen T, Glud C, et al. Prestroke physical activity is associated with severity and long-term outcome from first-ever stroke. *Neurology* 2008;71(17):1313-8. doi: 10.1212/01.wnl.0000327667.48013.9f
8. Deplanque D, Masse I, Libersa C, et al. Previous leisure-time physical activity dose dependently decreases ischemic stroke severity. *Stroke Res Treat* 2012;2012:614925. doi: 10.1155/2012/614925
9. Hallmarker U, Asberg S, Michaelsson K, et al. Risk of Recurrent Stroke and Death After First Stroke in Long-Distance Ski Race Participants. *J Am Heart Assoc* 2015;4(10):e002469. doi: 10.1161/JAHA.115.002469
10. Stroud N, Mazwi TM, Case LD, et al. Prestroke physical activity and early functional status after stroke. *J Neurol Neurosurg Psychiatry* 2009;80(9):1019-22. doi: 10.1136/jnnp.2008.170027
11. Ursin MH, Ihle-Hansen H, Fure B, et al. Effects of premorbid physical activity on stroke severity and post-stroke functioning. *J Rehabil Med* 2015;47(7):612-7. doi: 10.2340/16501977-1972
12. Bauman AE, Reis RS, Sallis JF, et al. Correlates of physical activity: why are some people physically active and others not? *Lancet* 2012;380(9838):258-71. doi: 10.1016/S0140-6736(12)60735-1
13. Trost SG, Owen N, Bauman AE, et al. Correlates of adults' participation in physical activity: review and update. *Med Sci Sports Exerc* 2002;34(12):1996-2001. doi: 10.1249/01.MSS.0000038974.76900.92
14. Rand D, Eng JJ, Tang PF, et al. Daily physical activity and its contribution to the health-related quality of life of ambulatory individuals with chronic stroke. *Health Qual Life Outcomes* 2010;8:80. doi: 10.1186/1477-7525-8-80
15. English C, Manns PJ, Tucak C, et al. Physical activity and sedentary behaviors in people with stroke living in the community: a systematic review. *Phys Ther* 2014;94(2):185-96. doi: 10.2522/ptj.20130175
16. Danielsson A, Meirelles C, Willen C, et al. Physical activity in community-dwelling stroke survivors and a healthy population is not explained by motor function only. *PM R* 2014;6(2):139-45. doi: 10.1016/j.pmrj.2013.08.593
17. Danielsson A, Willen C, Sunnerhagen KS. Physical activity, ambulation, and motor impairment late after stroke. *Stroke Res Treat* 2012;2012:818513. doi: 10.1155/2012/818513
18. Rand D, Eng JJ, Tang PF, et al. How active are people with stroke?: use of accelerometers to assess physical activity. *Stroke* 2009;40(1):163-8. doi: 10.1161/STROKEAHA.108.523621

19. Lopez-Cancio E, Ricciardi AC, Sobrino T, et al. Reported Prestroke Physical Activity Is Associated with Vascular Endothelial Growth Factor Expression and Good Outcomes after Stroke. *J Stroke Cerebrovasc Dis* 2017;26(2):425-30. doi: 10.1016/j.jstrokecerebrovasdis.2016.10.004
20. Roth EJ, Heinemann AW, Lovell LL, et al. Impairment and disability: their relation during stroke rehabilitation. *Arch Phys Med Rehabil* 1998;79(3):329-35.
21. Nicholson S, Sniehotta FF, van Wijck F, et al. A systematic review of perceived barriers and motivators to physical activity after stroke. *Int J Stroke* 2013;8(5):357-64. doi: 10.1111/j.1747-4949.2012.00880.x
22. Jackson S, Mercer C, Singer BJ. An exploration of factors influencing physical activity levels amongst a cohort of people living in the community after stroke in the south of England. *Disabil Rehabil* 2016:1-11. doi: 10.1080/09638288.2016.1258437
23. Alt Murphy M, Persson HC, Danielsson A, et al. SALGOT - Stroke Arm Longitudinal study at the University of Gothenburg, prospective cohort study protocol. *BMC Neurol* 2011;11(1):56. doi: 10.1186/1471-2377-11-56 [published Online First: 2011/05/27]
24. Lyle RC. A performance test for assessment of upper limb function in physical rehabilitation treatment and research. *Int J Rehabil Res* 1981;4(4):483-92. [published Online First: 1981/01/01]
25. von Elm E, Altman DG, Egger M, et al. The Strengthening the Reporting of Observational Studies in Epidemiology (STROBE) statement: guidelines for reporting observational studies. *Lancet* 2007;370(9596):1453-7. doi: 10.1016/S0140-6736(07)61602-X
26. Asplund K, Hulter Asberg K, Appelros P, et al. The Riks-Stroke story: building a sustainable national register for quality assessment of stroke care. *International journal of stroke : official journal of the International Stroke Society* 2011;6(2):99-108. doi: 10.1111/j.1747-4949.2010.00557.x [published Online First: 2011/03/05]
27. Brott T, Adams HP, Jr., Olinger CP, et al. Measurements of acute cerebral infarction: a clinical examination scale. *Stroke* 1989;20(7):864-70. [published Online First: 1989/07/01]
28. van Swieten JC, Koudstaal PJ, Visser MC, et al. Interobserver agreement for the assessment of handicap in stroke patients. *Stroke; a journal of cerebral circulation* 1988;19(5):604-7. [published Online First: 1988/05/01]
29. Grimby G. Physical activity and muscle training in the elderly. *Acta Med Scand Suppl* 1986;711:233-7.
30. Mattiasson-Nilo I, Sonn U, Johannesson K, et al. Domestic activities and walking in the elderly: evaluation from a 30-hour heart rate recording. *Aging (Milano)* 1990;2(2):191-8.
31. Ladenvall P, Persson CU, Mandalenakis Z, et al. Low aerobic capacity in middle-aged men associated with increased mortality rates during 45 years of follow-up. *Eur J Prev Cardiol* 2016;23(14):1557-64. doi: 10.1177/2047487316655466
32. Takagi D, Nishida Y, Fujita D. Age-associated changes in the level of physical activity in elderly adults. *J Phys Ther Sci* 2015;27(12):3685-7. doi: 10.1589/jpts.27.3685
33. Kunkel D, Fitton C, Burnett M, et al. Physical inactivity post-stroke: a 3-year longitudinal study. *Disabil Rehabil* 2015;37(4):304-10. doi: 10.3109/09638288.2014.918190
34. Lindahl M, Hansen L, Pedersen A, et al. Self-reported physical activity after ischemic stroke correlates with physical capacity. *Adv Physiother* 2008;10(4):188-94.
35. Buchman AS, Wilson RS, Yu L, et al. Total daily activity declines more rapidly with increasing age in older adults. *Arch Gerontol Geriatr* 2014;58(1):74-9. doi: 10.1016/j.archger.2013.08.001
36. Knoflach M, Matosevic B, Rucker M, et al. Functional recovery after ischemic stroke--a matter of age: data from the Austrian Stroke Unit Registry. *Neurology* 2012;78(4):279-85. doi: 10.1212/WNL.0b013e31824367ab
37. Hagstromer M, Oja P, Sjostrom M. Physical activity and inactivity in an adult population assessed by accelerometry. *Med Sci Sports Exerc* 2007;39(9):1502-8. doi: 10.1249/mss.0b013e3180a76de5

- 1  
2  
3 38. Grimby G, Borjesson M, Jonsdottir IH, et al. The "Saltin-Grimby Physical Activity Level Scale" and  
4 its application to health research. *Scand J Med Sci Sports* 2015;25 Suppl 4:119-25. doi:  
5 10.1111/sms.12611  
6 39. Thune I, Njolstad I, Lochen ML, et al. Physical activity improves the metabolic risk profiles in men  
7 and women: the Tromso Study. *Arch Intern Med* 1998;158(15):1633-40.  
8 40. Alzahrani MA, Dean CM, Ada L, et al. Mood and Balance are Associated with Free-Living Physical  
9 Activity of People after Stroke Residing in the community. *Stroke Res Treat*  
10 2012;2012:470648. doi: 10.1155/2012/470648  
11  
12  
13  
14  
15  
16  
17  
18  
19  
20  
21  
22  
23  
24  
25  
26  
27  
28  
29  
30  
31  
32  
33  
34  
35  
36  
37  
38  
39  
40  
41  
42  
43  
44  
45  
46  
47  
48  
49  
50  
51  
52  
53  
54  
55  
56  
57  
58  
59  
60

## Figure legends

*Fig 1. Flowchart for inclusion of the study participants*

*Fig 2. Predicted probabilities of being mostly inactive one year after stroke. The predicted probability increases with higher age, higher degree of functional dependency and being physically inactive pre-stroke.*

*Fig.3 Predicted probability for having low PA one year after stroke. The predicted probability increases with higher age and higher degree of functional dependency.*



Flowchart for inclusion of the study participants

108x60mm (300 x 300 DPI)

review only

1  
2  
3  
4  
5  
6  
7  
8  
9  
10  
11  
12  
13  
14  
15  
16  
17  
18  
19  
20  
21  
22  
23  
24  
25  
26  
27  
28  
29  
30  
31  
32  
33  
34  
35  
36  
37  
38  
39  
40  
41  
42  
43  
44  
45  
46  
47  
48  
49  
50  
51  
52  
53  
54  
55  
56  
57  
58  
59  
60

1  
2  
3  
4  
5  
6  
7  
8  
9  
10  
11  
12  
13  
14  
15  
16  
17  
18  
19  
20  
21  
22  
23  
24  
25  
26  
27  
28  
29  
30  
31  
32  
33  
34  
35  
36  
37  
38  
39  
40  
41  
42  
43  
44  
45  
46  
47  
48  
49  
50  
51  
52  
53  
54  
55  
56  
57  
58  
59  
60



Predicted probabilities of being mostly inactive one year after stroke. The predicted probability increases with higher age, higher degree of functional dependency and being physically inactive pre-stroke.

53x42mm (300 x 300 DPI)

For peer review only



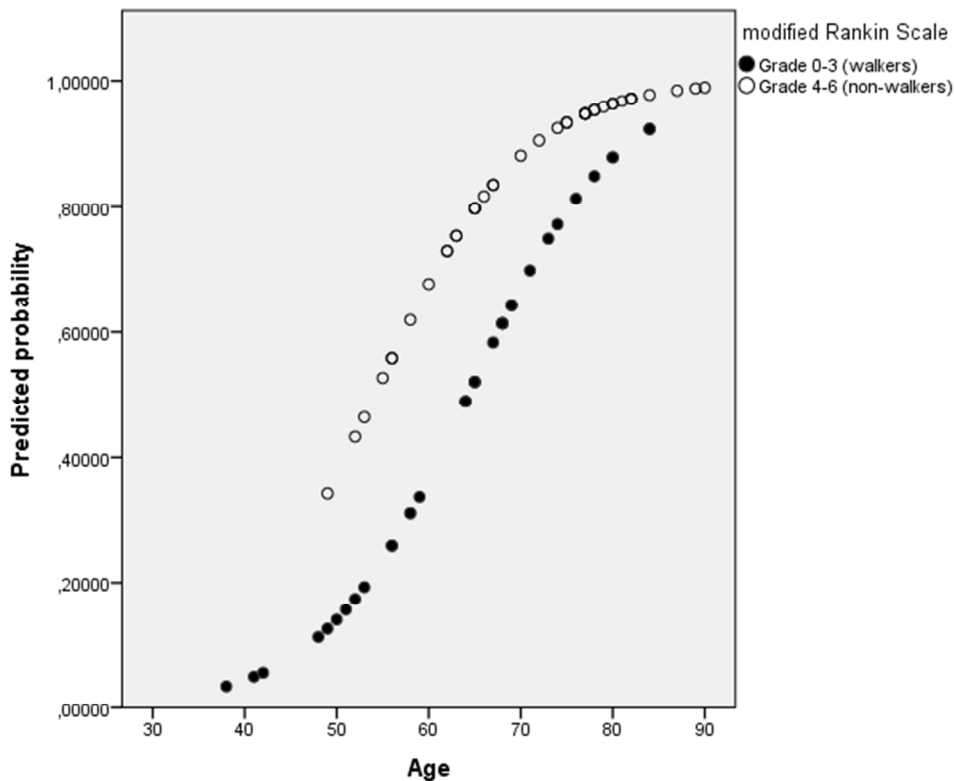

Predicted probability for having low PA one year after stroke. The predicted probability increases with higher age and higher degree of functional dependency.

53x42mm (300 x 300 DPI)

View Only

## Appendix A

### 6-level scale for physical activity

1. Hardly no physical activity
2. Mostly sitting, sometimes a walk, easy gardening or similar tasks, sometimes light household activities such as heating up food, dusting, or “clearing away”
3. Light physical exercise for about 2-4 hours a week, e.g. walks, fishing, dancing, ordinary gardening etc., including walks to and from shops. Main responsibility for light domestic work such as cooking, dusting, “clearing away”, and making beds. Performs or takes part in weekly cleaning
4. Moderate exercise 1-2 hours a week, e.g. jogging, swimming, gymnastics, heavier gardening, home repair or easier physical activities more than 4 hours a week. Responsible for all domestic activities, easy as well as heavy. Weekly cleaning with vacuum cleaning, washing floors and window-cleaning
5. Moderate exercise at least 3 hours a week, e.g. tennis, swimming, jogging etc.
6. Hard or very hard exercise regularly and several times a week, during which physical exertion is great, e.g. jogging, skiing

## Appendix B

Supplementary table. Univariate logistic regression analysis between predictors and outcome variable of physical activity level one year after stroke

| Predictor variables                  | Mostly inactive<br>(grade 1-2) |         | Low PA<br>(grade 1-3) |         |
|--------------------------------------|--------------------------------|---------|-----------------------|---------|
|                                      | Wald                           | p-value | Wald                  | p-value |
| Age                                  | 14.018                         | <0.001  | 16.483                | <0.001  |
| Gender                               | 0.001                          | 0.970   | 0.518                 | 0.472   |
| Ischemic/hemorrhagic                 | 1.274                          | 0.259   | 1)                    | 1)      |
| Smoking                              | 1)                             | 1)      | 1.083                 | 0.298   |
| Shared living                        | 1.918                          | 0.166   | 4.597                 | 0.032   |
| Treatment for high<br>blood pressure | 1.487                          | 0.223   | 1)                    | 1)      |
| NIHSS                                | 3.946                          | 0.061   | 1.588                 | 0.208   |
| ARAT                                 | 9.545                          | 0.002   | 10.023                | 0.002   |
| mRS                                  | 11.902                         | 0.001   | 9.512                 | 0.002   |
| Pre-stroke PA                        | 11.755                         | 0.001   | 6.669                 | 0.010   |

1) = not applicable due to too small subgroups for analysis.

P-Value for significance set for 0.25

Abbreviations: NIHSS=National Institute of Health Stroke Scale, mRS=modified Rankin Scale, ARAT=Action Research Arm Test, PA=Physical Activity.

## STUDY PROTOCOL

## Open Access

# SALGOT - Sroke Arm Longitudinal study at the University of Gothenburg, prospective cohort study protocol

Margit Alt Murphy\*, Hanna C Persson, Anna Danielsson, Jurgen Broeren, Åsa Lundgren-Nilsson and Katharina S Sunnerhagen

## Abstract

**Background:** Recovery patterns of upper extremity motor function have been described in several longitudinal studies, but most of these studies have had selected samples, short follow up times or insufficient outcomes on motor function. The general understanding is that improvements in upper extremity occur mainly during the first month after the stroke incident and little if any, significant recovery can be gained after 3-6 months. The purpose of this study is to describe the recovery of upper extremity function longitudinally in a non-selected sample initially admitted to a stroke unit with first ever stroke, living in Gothenburg urban area.

**Methods/Design:** A sample of 120 participants with a first-ever stroke and impaired upper extremity function will be consecutively included from an acute stroke unit and followed longitudinally for one year. Assessments are performed at eight occasions: at day 3 and 10, week 3, 4 and 6, month 3, 6 and 12 after onset of stroke. The primary clinical outcome measures are Action Research Arm Test and Fugl-Meyer Assessment for Upper Extremity. As additional measures, two new computer based objective methods with kinematic analysis of arm movements are used. The ABILHAND questionnaire of manual ability, Stroke Impact Scale, grip strength, spasticity, pain, passive range of motion and cognitive function will be assessed as well. At one year follow up, two patient reported outcomes, Impact on Participation and Autonomy and EuroQol Quality of Life Scale, will be added to cover the status of participation and aspects of health related quality of life.

**Discussion:** This study comprises a non-selected population with first ever stroke and impaired arm function. Measurements are performed both using traditional clinical assessments as well as computer based measurement systems providing objective kinematic data. The ICF classification of functioning, disability and health is used as framework for the selection of assessment measures. The study design with several repeated measurements on motor function will give us more confident information about the recovery patterns after stroke. This knowledge is essential both for optimizing rehabilitation planning as well as providing important information to the patient about the recovery perspectives.

**Trial registration:** ClinicalTrials.gov: NCT01115348

**Keywords:** stroke, upper extremity, recovery of function, kinematics, longitudinal study

\* Correspondence: [margit.alt-murphy@vgregion.se](mailto:margit.alt-murphy@vgregion.se)  
Department of Clinical Neuroscience and Rehabilitation, Institute of Neuroscience and Physiology, Sahlgrenska Academy at University of Gothenburg, Gothenburg, Sweden

## Background

Stroke is defined by the World Health Organization (WHO) as rapidly developing clinical signs of focal or global disturbance of cerebral function, with symptoms lasting more than 24 hours or leading to death and with no apparent non-vascular cause. The incidence of stroke in Sweden is 300 cases per 100 000 inhabitants in a year of whom 200 suffer a first incidence of stroke leading to a total of 18 000 new stroke victims. About 25000 - 30000 persons yearly suffer from acute stroke each year in Sweden. Of these, about 20% will die within the first month and about 1/3 of the survivors will remain significantly disabled after 6-12 months [1].

The upper extremity function is impaired after stroke in approximately 70-80% of patients in acute phase and in 40% in chronic phase [2-4]. This impairment limits the voluntary, well coordinated, and effective movements as well as a person's level of activity [5] and participation in their social and physical environment [2]. This longstanding disability might also influence the quality of life [6].

Recovery of motor skills after stroke depends both on spontaneous reparative process as well as reorganization of neural mechanisms, influenced by inputs and demands given to the motor control system. The current perspective on motor learning focuses on active task-oriented training and how feedback and other basic training principals such as regularity, intensity and specificity affects the long-term recovery [7,8]. In order to detect meaningful improvements in motor function, appropriate outcome measures should be used. Beside the requirements on reliability, validity and sensitivity, the issues of functionality and objectivity must be considered while selecting the appropriate measures. Assessment methods with continuous variables are recommended to be included into evaluation batteries since they might have higher power to detect the important improvements in motor recovery [9-11].

Improved understanding of the recovery patterns after stroke is essential for planning and execution of optimal rehabilitation. Recovery patterns of upper extremity function have been described for selected stroke populations in several longitudinal studies. The general idea is that improvements in the upper extremity occur mainly during the first month after onset of the stroke and that little, if any, significant recovery can be gained after 3-6 months [3,12-14]. Several studies, conducted in selected populations at rehabilitation facilities have shown that, in some patients, the improvements also continued for a longer time [2,4,15]. There are only a few studies with non-selected community based populations describing the recovery patterns in the upper extremity. These studies report a similar recovery pattern with little or no significant recovery beyond 2-3 months [3,16-18].

Whether this is correct is not clear for the non-selected studies, since in some reports the sample sizes were small [14,15], the follow up times were short [3,4] or the information on the motor assessments was not satisfactory [3,18].

### Kinematic measurement - drinking task

Kinematics describes movements of the body through space and time, including linear and angular displacements, velocities and accelerations, but without reference to the forces involved. Kinematic data can be achieved by optoelectronic systems where multiple high-speed cameras send out infra red light signals and detect the reflection from the markers placed on the body. Kinematic variables provide objective, precise and detailed measures of movement performance and quality.

Kinematic movement analysis has become a useful assessment tool within rehabilitation and is employed routinely for gait analyses. Few studies have used kinematic movement analysis to examine the upper extremity in a longitudinal design. In one of these studies the kinematic data was obtained from an isolated fast elbow extension [15,19] and in the other a targeting fast reaching movement [20]. In order to better understand the situation of a person with impaired upper extremity function, information is needed regarding activities of daily living. It is known that the motor activity of the upper extremity is dependent on the meaning of the task and on the shape and placement of the object [21]. Thus, it is meaningful to study natural purposeful movements with real-life objects. In an earlier study we have developed a test protocol and a program for data analyses of the kinematic variables for the activity of drinking from a glass, which has been applied in a control setting [22] and in stroke subjects [23].

### Kinematic measurement - Virtual reality test

Virtual reality (VR) can be described as the world perceived in a computer. VR systems that include a haptic device can provide tactile feedback to the user through the force feedback. If the system detects a collision between the device and virtual objects, it transmits a reaction to the user's hand, which interacts with perception of the test or training situation [24]. In the real world, objects are usually perceived in the same location whether the sense involved is vision or touch (haptic). In the virtual world, the precise co-location of haptics is technically harder to achieve, but when the co-location is accurate the realism of the manipulation is very high and the user's performance is improved [25]. The knowledge about effects of using VR in assessments and training after stroke is still limited, but sufficiently encouraging to justify additional clinical trials in this population [26-31].

## Theoretical background

WHO approved in May 2001 the model on International Classification of Functioning, Disability and Health (ICF) [32] to assess the consequences of a disorder or a disease on the individual person. The ICF model provides a multi-perspective approach to the classification of functioning and disability as an interactive and evolutionary process. In the model an individual's functions in a specific domain is an interaction or complex relationship between the health conditions (physical or mental) and contextual factors (social and physical environment as well as personal factors). The components of ICF can be used to indicate problems (e.g. impairments, activity limitations or participation restrictions summarized under the umbrella term disability) in different areas. This approach forces health professionals to look wider than the usual perspective, which has traditionally lain in the domain of body function and structures. The model boosts the traditional rehabilitation ideology where the focus has not been on the organ but on the person and thereby requiring different treatments depending on that person's goal. In order to assess the consequences of a disease we need to look at different components of the ICF.

Longitudinal studies are difficult to perform. Sweden has a unique situation since people are quite easy to trace through the civic system and moving from one region to another is not so frequent. In addition, the representativeness for the disease is good since all patients within a catchment area are usually referred to the same hospital as private alternatives are scarce and thereby the possibilities to generalize the results are good.

The purpose of this study is to describe the recovery of upper extremity function longitudinally in a non-selected sample with first ever clinical stroke admitted to a stroke unit.

The specific objectives of the present study are to:

- A. Follow recovery of upper extremity by using clinical measures of body function (motor function, spasticity), activity (use of the arm and hand) and participation (impact of limitations) after stroke
- B. Follow functional recovery by using objective, new IT technology (kinematic movement analysis and VR-test with sensory feedback) after stroke
- C. To gather the assessments of participants self-perceived upper extremity function over the first year after stroke
- D. To predict function at 12 months by analysis of data gathered at first week after onset of stroke

## Methods/Design

A sample of 120 persons with a first occurrence of stroke will be included and followed longitudinally for

one year after the stroke. The group will consist of consecutively included persons recruited from the stroke unit at Sahlgrenska University Hospital, Gothenburg, Sweden. The Stroke unit at Sahlgrenska University Hospital serves the larger Gothenburg urban area, thus all persons from this catchment area are randomly referred to the Sahlgrenska University Hospital. The project is approved by the Regional Ethical Review Board and the Helsinki declaration is followed. Written informed consent will be obtained from the participants or from their closest relative. The SALGOT study is registered on ClinicalTrials.gov (NCT01115348).

Inclusion criteria are:

- Diagnosed first ever clinical stroke, based on WHO criteria (ischemic infarct, haemorrhagic and subarachnoidal bleeding)
- Impaired upper extremity function. This is defined in two steps. On the first or second day after stroke onset the upper extremity function is assessed with Modified Motor Assessment Scale (M-MAS UAS-95) [33] (this is performed as standard clinical assessment by physiotherapists working at the stroke unit). All persons, who do not obtain the maximum score on the subtests of arm function, hand movements and fine motor function due to hemiparesis, will be informed about the study and retested at day three after stroke with Action Research Arm Test (ARAT) [34]. All persons who do not achieve the maximum score for ARAT (score 57) will be included.
- Admitted to the stroke unit within three days after stroke onset
- Living in the Gothenburg urban area (maximal 35 km from the Sahlgrenska University Hospital)
- Age 18 or older

Exclusion criteria are:

- Upper-extremity injury or condition prior to the stroke that limits the functional use of the affected arm and hand
- Severe multi-impairment or diminished physical condition before the stroke that will affect the arm function
- Life expectancy less than 12 months due to other illness (cardiac disease, malignancy) or severity of stroke injury
- Not Swedish speaking prior to the stroke incident

## Design and procedure

This study will evaluate the recovery patterns after first ever stroke without any intervention except standard rehabilitation planning and procedures. All included



participants will be assessed eight times during the first year after stroke. Assessments are performed at day 3 and 10, week 3, 4 and 6, month 3, 6 and 12 after onset of stroke. Tests are administered in block randomized manner in order to minimize the systematic testing bias. The test order and the reason for missed or unsuccessful test results will be recorded in a protocol. All tests are performed by three experienced physical therapists, undergoing a training period together for the assessment battery prior to the study start. ICF classification of functioning, disability and health is used as framework for the selection of assessment measures (Figure 1).

### Outcome measures

Demographic data will be collected during the first assessment. Stroke subtype will be confirmed by CT and/or MRI scans. Ischemic strokes will be classified for subtype and site for lesion by using TOAST [35] and Bamford classifications [36]. Treatments of thrombolysis or thromboectomy will be registered. Additional data will be extracted from the national quality register for stroke - Swedish Stroke Register [1]. The Self-Administered Comorbidity Questionnaire (SCQ) will be used to collect additional information on relevant medical conditions and problems [37]. Cognitive function is evaluated at every test occasion using Barrow Neurological Institute Screen for Higher Cerebral Functions (BNIS) [38]. The three prescreen items scoring the level of consciousness/alertness, cooperation and basic communication skills and the item of

auditory comprehension will be assessed. The level of physical activity is recorded by a 6-grade scale of Physical Activity Classification [39,40]. This instrument is valid, short and suitable for longitudinal studies and takes account the activity level both during domestic and fitness activities [40]. Exact time points for all assessments are listed in Table 1.

### Clinical outcome measures of function and activity

The upper extremity motor function will be assessed using the Fugl-Meyer Assessment for Upper Extremity (FMA-UE) [41], and a maximum score of 66 corresponds to normal motor function. The psychometric properties of Fugl-Meyer Assessment have shown excellent reliability and validity [41-43]. The non-motor domains of FMA-UE, sensation, passive range of motion and pain during passive joint motions will be completed as well.

Action research Arm Test (ARAT) is a performance test for upper extremity function and dexterity [44]. The ARAT uses ordinal scoring on 19 items divided into four hierarchical subtests: grasp, grip, pinch and gross movement. Each upper extremity is evaluated individually and the test can be completed in 5-15 minutes [44,45]. ARAT has been shown to have good validity, sensitivity to spontaneous and therapy-related gains after stroke both in acute and chronic phase [44,46]. The ARAT has shown good responsiveness [47] and excellent inter-rater and intra-rater reliability [44,48].

Spasticity will be assessed with the Modified Ashworth Scale (MAS). The muscle groups of elbow flexors and





**Table 1 Scheme over the assessments and time-points for test occasions**

| Assessments               | Test occasion (d=day, w=week, m=month) |    |     |    |    |    |    |    |     |
|---------------------------|----------------------------------------|----|-----|----|----|----|----|----|-----|
|                           | d1                                     | d3 | d10 | w3 | w4 | w6 | m3 | m6 | m12 |
| M-MAS UAS -95             | x                                      |    |     |    |    |    |    |    |     |
| NIHSS                     | x                                      |    |     |    |    |    |    |    |     |
| BNIS                      |                                        | x  | x   | x  | x  | x  | x  | x  | x   |
| Physical activity scale   |                                        | x  |     |    |    |    |    | x  | x   |
| FMA-UE                    |                                        | x  | x   | x  | x  | x  | x  | x  | x   |
| Action Research Arm Test  |                                        | x  | x   | x  | x  | x  | x  | x  | x   |
| ABILHAND                  |                                        | x  | x   | x  | x  | x  | x  | x  | x   |
| Grip strength             |                                        | x  | x   | x  | x  | x  | x  | x  | x   |
| Modified Ashworth Scale   |                                        | x  | x   | x  | x  | x  | x  | x  | x   |
| Kinematic - drinking task |                                        | x  | x   |    | x  |    | x  | x  | x   |
| Kinematic - VR-test       |                                        | x  | x   | x  | x  | x  | x  | x  | x   |
| Stroke Impact Scale       |                                        |    | x   |    | x  |    | x  | x  | x   |
| IPA-E                     |                                        |    |     |    |    |    |    |    | x   |
| EQ-5D                     |                                        |    |     |    |    |    |    |    | x   |

extensors, wrist flexors and extensors will be evaluated. The MAS is the best alternative for spasticity assessment in clinical setting available and has been shown to have fair reliability for these joints [49,50].

The grip strength will be measured using the Jamar Hand Dynamometer. Standardized positioning and instructions are followed and the average of three trials is used as test outcome [51]. Reliability for the grip strength measure is very high [52].

#### Kinematic measurements - objective outcomes of performance

Three-dimensional motion analysis of upper extremity during drinking task will be performed with a 5-camera optoelectronic ProReflex Motion Capture System (MCU240 Hz, Qualisys AB, Sweden). The tracing of the three-dimensional coordinate positions of the markers is completed automatically by Qualisys Track Manager, 2.0. The capture data is then transferred to MATLAB (The MathWorks Inc) software for custom-made analysis. A standardized drinking task with stable test-retest reliability will be used [53]. The participant is sitting in front of the table with tested hand resting on the edge of the table (Figure 2). A drinking glass, filled with 100 mL water is placed 30 cm from the table edge in the midline of the body. The drinking task includes reaching, grasping, and lifting the glass from the table and taking a drink (one sip); placing the glass back on the table behind a marked line; and returning to the initial

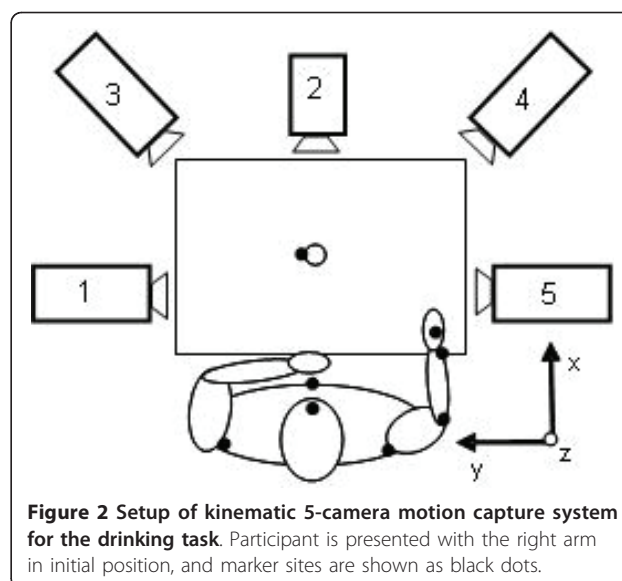

**Figure 2 Setup of kinematic 5-camera motion capture system for the drinking task.** Participant is presented with the right arm in initial position, and marker sites are shown as black dots.

position. Participants are instructed to sit against the chair back during the whole task, but the sitting position is not restrained, and compensatory movements are allowed. All participants perform the drinking task at a comfortable self-paced speed, starting with their non-affected arm, after practicing a few times. The mean of the three middle trials of total five will be used for statistical calculations. A total of 9 spherical 12-mm retro-reflective markers are placed on the third metacarpophalangeal joint of hand, styloid process of ulna on wrist, lateral epicondyle of elbow, middle part of acromion on right and left shoulder, upper part of sternum, forehead and on the upper and lower edge of the glass. The procedure has been described in more detail previously [53,54].

In the VR test [55], the participant reaches into a virtual space and interacts with 3D objects. The VR equipment consists of a semi-immersive workbench with haptic device and stereoscopic glasses. In our set-up, the haptic equipment looks like a stylus shaped instrument attached to a lever system and it is freely movable in all directions (Figure 3). During the test, the position of the stylus is tracked, and resistive force is applied to the stylus when it comes into contact with the virtual object, providing force feedback. In addition to the visual perception, the haptic device creates an illusion of manipulation and sensation of the virtual objects. The participant moves the stylus in a realistic environment, experiencing the sense of moving inside the computer screen. The precise co-location of haptics is achieved by projecting the virtual image onto the same location as the user's hand through the mirror setup. The VR-test, developed by our group, is a precise quantitative kinematic measurement tool for arm and hand movements

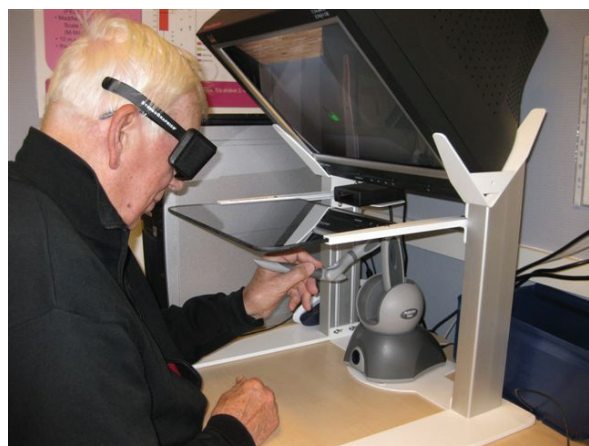

**Figure 3** Participant is performing the VR-test. The VR equipment consists of a semi-immersive workbench with haptic device and stereoscopic glasses.

and has been shown to have a good test retest reliability [31,56,57]. During the test the participant has to move the haptic stylus to 32 different targets in the virtual environment (VE) generated by the computer. The targets appear one after the other and disappear when touched. Each target consists of a whole circle (diameter 3.0 cm viewing angle). The 32 target placements in the VE are random to the subject but are actually set according to a pre-set kinematic scheme for evaluation purposes. In each test occasion the participant have one or two training trails before the measurements starts. Both dominant and non-dominant hand is measured, starting with the non-dominant hand. The participant performs the test as fast as possible.

#### Self-perceived outcomes

ABILHAND [58,59] is a questionnaire aiming to assess manual ability in persons with chronic stroke. It is interview based and focused on perceived difficulties in everyday activities. A Swedish version has been validated [60]. ABILHAND is a Rasch-based assessment; it is unidimensional and can be used as linear measure [58,59].

Stroke Impact Scale (SIS) [61] is a questionnaire on different aspects of the stroke recovery where the person replies on their perception regarding their life after the stroke. The 59 questions are divided into 8 domains; strength, memory, emotion, communication, activities of daily living, mobility, hand function and social participation. Items within the domain are ordered hierarchically based on clinical perspective and Rasch analysis [62]. Only the first four sections are used for the test occasion at day 10.

Impact on Participation and Autonomy (IPA-E) is a generic outcome measure for adults with chronic conditions where the person estimates perceived limitations

in participation and autonomy related to dependency in the current living surrounding [63-65]. The subscales include autonomy indoors, family role, autonomy outdoors, social life and relationships, work and education. Additionally, IPA-E identifies the extent to which limitations in life are experienced as problematic in areas of mobility, self care, activities, economy issues, social life, work and education. IPA-E is valid, reliable and sensitive to change after stroke [63-65].

EuroQol Quality of Life Scale (EQ-5D) will be used to measure the health status related to the quality of life. It is a widely used generic measure and includes five dimensions: mobility, self-care, usual activities, pain/discomfort and anxiety/depression [66,67].

#### Data analysis

The kinematic data in the drinking task is filtered with a 6-Hz second-order Butterworth filter, resulting in zero-phase distortion and fourth-order filtering. The drinking task is broken down into five logical phases: reaching for the glass, forward transport of the glass to the mouth, drinking, back transport of the glass to the table, and returning the hand to the initial position. The selection of kinematic variables and data analysis calculations will be based on our earlier studies [53,54]. Movement onset is defined as the time when the tangential velocity of the hand marker exceeds 2% of the maximum velocity in the reaching phase. Movement offset is detected when the velocity of the hand is less than 2% of the maximum velocity in the returning phase. Start of forward transport phase is defined as the time when the tangential velocity of the glass exceeds 15 mm/s. The drinking phase is identified by a 15% increase or decrease of the steady-state distance between the face and glass marker. The start of the returning phase is defined as the time when the tangential velocity of the glass is less than 10 mm/s. Movement times are calculated for the whole movement and separately for each phase. Peak tangential velocity and angular velocity of the elbow joint are computed for the reaching phase. Smoothness of movement is quantified by computing the number of movement units during the reaching and forward transport phases [53]. Angular joint motions are computed from the 3D position data for elbow flexion/extension, shoulder flexion/extension in the sagittal plane, and abduction/adduction in the frontal plane [53]. Compensatory trunk movement is computed for the entire drinking task as the maximal displacement of the thorax marker from the initial position [53]. Inter-joint coordination between the shoulder and elbow joint angles for reaching phase is computed using cross-correlation analysis of zero time lag [53].

In the VR-test hand position data (haptic stylus end-point) will be gathered. The position of the stylus is

tracked and resistive force is applied to it when it comes into contact with the virtual model, providing force feedback. All measurements generate time-stamped motion data (x, y, z) at 1000 Hz. Different parameters such as reaction- and movement time, velocity, acceleration and deceleration times are calculated. To obtain the movement quality of the hand trajectory, a hand path ratio, corresponding to the length of the pathway is calculated. The selection of kinematic variables and data analysis calculations will be based on our earlier study [30].

The raw scores from the ABILHAND questionnaire are analyzed using a Rasch analysis computer program and expressed as logistically transformed probability measures, logits [68]. In the Rasch model the raw scores are used to estimate the linear ability for each subject and linear difficulty for each item of measurement around a unidimensional continuum. Thus, the Rasch model converts the ordinal score of subject's manual ability into an equal interval linear measure.

#### Group size/power analysis

Prior longitudinal studies stroke cohorts at Sahlgrenska University Hospital have had a dropout rate of 30%. With a power (1- $\beta$ ) at 0.8 and a significance level ( $\alpha$ ) at 0.05, we need a sample of 88 patients (two-sided test) to determine a medium effect of 6 points change (10%) on ARAT. Therefore, we aim to include 120 persons.

#### Discussion

The SALGOT study is a longitudinal prospective study with a non-selected sample from Gothenburg urban area. A sample of 120 persons with first ever clinical stroke admitted to a stroke unit will be consecutively recruited from Sahlgrenska University Hospital. The study is non-interventional and the main goal is to describe the recovery of upper extremity function after first ever clinical stroke and to follow the improvements and consequences of stroke during the first year in these persons life. Measurements are performed both using traditional clinical assessments as well as computer based measurement systems that provide objective kinematic data. The person's perspective of recovery is captured both with stroke specific as well as generic self-perceived outcome measures.

In this study, the participants are assessed at eight occasions during the first year after stroke. This design gives an opportunity to study which persons will recover, when and in which areas the recovery occurs. From earlier studies it is known that the improvement of function is mostly gained during the first months after stroke. But the majority of these reports have been conducted on selected populations and in many studies the selection of outcome measures on motor function has not been sufficient. Additionally, new technologies

obtaining objective kinematic measures on motor function and performance have been scarcely used in longitudinal studies.

The gained knowledge of recovery patterns is necessary both for the healthcare system and for the individual who has suffered a stroke. Since the rehabilitation resources are limited, there is a need to know the optimal time point for interventions and have guidelines for rehabilitation planning. The more detailed information about the recovery patterns of upper extremity is needed in order to offer individualized assessment and treatment, to inform the patient sufficiently about the recovery perspectives and to enhance the patient's motivation for the rehabilitation period.

#### Abbreviations

ARAT: Action research Arm Test; BNIS: Barrow Neurological Institute Screen for Higher Cerebral Functions; EQ-5D: EuroQoL Quality of Life Scale; FMA-UE: Fugl-Meyer Assessment for Upper Extremity; IPA-E: Impact on Participation and Autonomy; M-MAS UAS-95: Modified Motor Assessment Scale accordingly Uppsala Akademiska Sjukhus 95; NIHSS: National Institutes of Health Stroke Scale; SIS: Stroke Impact Scale; TOAST: Trail of Org 10172 in Acute Treatment; VR: Virtual reality; VE: Virtual Environment.

#### Acknowledgements and Funding

This project has been funded in part by the Local Research and Development Board for Gothenburg and Södra Bohuslän, the Regional Research and Development Board for Västra Götaland, the Norrbacka-Eugenia Foundation, Promobilia, the Hjalmar Svensson's Research Foundation, Greta and Einar Askers Foundation, the Foundation of the Swedish National Stroke Association, Rune and Ulla Amlövs Foundation and Inger Bendix Foundation for Medical Research.

#### Authors' contributions

MAM and HCP participated in the conception and design, planning, managing the process and are responsible for day-to-day management of the study. KSS initiated the study, participated in the conception and design, managed the process and drafted the initial manuscript. All authors contributed to the study planning, drafting the manuscript and have approved the final manuscript.

#### Competing interests

The authors declare no competing interests.

Received: 21 March 2011 Accepted: 25 May 2011

Published: 25 May 2011

#### References

1. Riks-Stroke. Årsrapport 2009. The Swedish Stroke register. [<http://www.riks-stroke.org/content/analyser/Rapport09.pdf>], [cited 2011-01-26].
2. Broeks JG, Lankhorst GJ, Rumping K, Prevo AJ: **The long-term outcome of arm function after stroke: results of a follow-up study.** *Disabil Rehabil* 1999, **21**(8):357-364.
3. Nakayama H, Jorgensen HS, Raaschou HO, Olsen TS: **Recovery of upper extremity function in stroke patients: the Copenhagen Stroke Study.** *Arch Phys Med Rehabil* 1994, **75**(4):394-398.
4. Parker VM, Wade DT, Langton Hower R: **Loss of arm function after stroke: measurement, frequency, and recovery.** *Int Rehabil Med* 1986, **8**(2):69-73.
5. Feys HM, De Weerd WJ, Selz BE, Cox Steck GA, Spichiger R, Vereeck LE, Putman KD, Van Hoydonck GA: **Effect of a therapeutic intervention for the hemiplegic upper limb in the acute phase after stroke: a single-blind, randomized, controlled multicenter trial.** *Stroke* 1998, **29**(4):785-792.
6. Nichols-Larsen DS, Clark PC, Zeringue A, Greenspan A, Blanton S: **Factors influencing stroke survivors' quality of life during subacute recovery.** *Stroke* 2005, **36**(7):1480-1484.



7. Carr J, Shepherd RB: **Neurological rehabilitation, optimizing motor performance.** Oxford: Butterworth, Heineman; 1998.
8. Kwakkel G, Wagenaar RC, Twisk JW, Lankhorst GJ, Koetsier JC: **Intensity of leg and arm training after primary middle-cerebral-artery stroke: a randomised trial.** *Lancet* 1999, **354**(9174):191-196.
9. Williams BK, Galea MP, Winter AT: **What is the functional outcome for the upper limb after stroke?** *Aust J Physiother* 2001, **47**(1):19-27.
10. Kwakkel G, Kollen B, Lindeman E: **Understanding the pattern of functional recovery after stroke: facts and theories.** *Restor Neural Neurosci* 2004, **22**(3-5):281-299.
11. Dobkin BH: **Confounders in rehabilitation trials of task-oriented training: lessons from the designs of the EXCITE and SCILT multicenter trials.** *Neurorehabil Neural Repair* 2007, **21**(1):3-13.
12. Hendricks HT, van Limbeek J, Geurts AC, Zwarts MJ: **Motor recovery after stroke: a systematic review of the literature.** *Arch Phys Med Rehabil* 2002, **83**(11):1629-1637.
13. Katrak P, Bowring G, Conroy P, Chilvers M, Poulos R, McNeil D: **Predicting upper limb recovery after stroke: the place of early shoulder and hand movement.** *Arch Phys Med Rehabil* 1998, **79**(7):758-761.
14. Verheyden G, Nieuwboer A, De Wit L, Thijs V, Dobbelaere J, Devos H, Severijns D, Vanbeveren S, De Weerd W: **Time course of trunk, arm, leg, and functional recovery after ischemic stroke.** *Neurorehabil Neural Repair* 2008, **22**(2):173-179.
15. Mirbagheri MM, Rymer WZ: **Time-course of changes in arm impairment after stroke: variables predicting motor recovery over 12 months.** *Arch Phys Med Rehabil* 2008, **89**(8):1507-1513.
16. Duncan PW, Goldstein LB, Matchar D, Divine GW, Feussner J: **Measurement of motor recovery after stroke. Outcome assessment and sample size requirements.** *Stroke* 1992, **23**(8):1084-1089.
17. Welmer AK, Holmqvist LV, Sommerfeld DK: **Limited fine hand use after stroke and its association with other disabilities.** *J Rehabil Med* 2008, **40**(8):603-608.
18. Lawrence ES, Coshall C, Dundas R, Stewart J, Rudd AG, Howard R, Wolfe CD: **Estimates of the prevalence of acute stroke impairments and disability in a multiethnic population.** *Stroke* 2001, **32**(6):1279-1284.
19. Mirbagheri MM, Tsao CC, Rymer WZ: **Changes of elbow kinematics and kinetics during 1 year after stroke.** *Muscle Nerve* 2008, **37**(3):387-395.
20. Wagner JM, Lang CE, Sahrman SA, Edwards DF, Dromerick AW: **Sensorimotor impairments and reaching performance in subjects with poststroke hemiparesis during the first few months of recovery.** *Phys Ther* 2007, **87**(6):751-765.
21. Trombly CA, Wu CY: **Effect of rehabilitation tasks on organization of movement after stroke.** *Am J Occup Ther* 1999, **53**(4):333-344.
22. Murphy MA, Sunnerhagen KS, Johnels B, Willen C: **Three-dimensional kinematic motion analysis of a daily activity drinking from a glass: a pilot study.** *J Neuroengineering Rehabil* 2006, **3**:18.
23. Murphy MA, Willén Carin, Sunnerhagen SKatharina: **Kinematic Variables Quantifying Upper-Extremity Performance After Stroke During Reaching and Drinking From a Glass.** *Neurorehabilitation and Neural Repair* 2010, **1**-11.
24. Crosbie JH, Lennon S, McNeill MD, McDonough SM: **Virtual reality in the rehabilitation of the upper limb after stroke: the user's perspective.** *Cyberpsychol Behav* 2006, **9**(2):137-141.
25. Swapp D, Pawar V, Loscos C: **Interaction with co-located haptic feedback in virtual reality.** *Virtual Reality* 2006, **10**(1):24-30.
26. Henderson A, Korner-Bitensky N, Levin M: **Virtual reality in stroke rehabilitation: a systematic review of its effectiveness for upper limb motor recovery.** *Top Stroke Rehabil* 2007, **14**(2):52-61.
27. Boian R, Sharma A, Han C, Merians A, Burdea G, Adamovich S, Recce M, Tremaine M, Poizner H: **Virtual reality-based post-stroke hand rehabilitation.** *Stud Health Technol Inform* 2002, **85**:64-70.
28. Viau A, Feldman AG, McFadyen BJ, Levin MF: **Reaching in reality and virtual reality: a comparison of movement kinematics in healthy subjects and in adults with hemiparesis.** *J Neuroeng Rehabil* 2004, **1**(1):11.
29. Broeren J, Claesson L, Goude D, Rydmark M, Sunnerhagen KS: **Virtual rehabilitation in an activity centre for community-dwelling persons with stroke. The possibilities of 3-dimensional computer games.** *Cerebrovasc Dis* 2008, **26**(3):289-296.
30. Broeren J, Rydmark M, Bjorkdahl A, Sunnerhagen KS: **Assessment and training in a 3-dimensional virtual environment with haptics: a report on 5 cases of motor rehabilitation in the chronic stage after stroke.** *Neurorehabil Neural Repair* 2007, **21**(2):180-189.
31. Broeren J, Sunnerhagen KS, Rydmark M: **A kinematic analysis of a haptic handheld stylus in a virtual environment: a study in healthy subjects.** *J Neuroeng Rehabil* 2007, **4**:13.
32. WHO: **International classification of functioning, disability and health: ICF.** Geneva: WHO Library Cataloguing-in-Publication Data; 2001.
33. Barkeluis K, Johansson A, Korm K, Lindmark B: **Reliabilitets- och validitetsprövning av Modifierad Motor Assessment Scale enligt Uppsala Akademiska Sjukhus -95.** *Nordisk Fysioterapi* 1997, **29**:161-165.
34. Lyle RC: **A performance test for assessment of upper limb function in physical rehabilitation treatment and research.** *Int J Rehabil Res* 1981, **4**(4):483-492.
35. Adams HP Jr, Bendixen BH, Kappelle LJ, Biller J, Love BB, Gordon DL, Marsh EE: **Classification of subtype of acute ischemic stroke. Definitions for use in a multicenter clinical trial. TOAST. Trial of Org 10172 in Acute Stroke Treatment.** *Stroke* 1993, **24**(1):35-41.
36. Bamford J, Sandercock P, Dennis M, Burn J, Warlow C: **Classification and natural history of clinically identifiable subtypes of cerebral infarction.** *Lancet* 1991, **337**(8756):1521-1526.
37. Sangha O, Stucki G, Liang MH, Fossel AH, Katz JN: **The Self-Administered Comorbidity Questionnaire: a new method to assess comorbidity for clinical and health services research.** *Arthritis Rheum* 2003, **49**(2):156-163.
38. Denvall V, Elmstahl S, Prigatano GP: **Replication and construct validation of the Barrow Neurological Institute Screen for Higher Cerebral Function with a Swedish population.** *J Rehabil Med* 2002, **34**(4):153-157.
39. Grimby G: **Physical activity and muscle training in the elderly.** *Acta Med Scand Suppl* 1986, **711**:233-237.
40. Mattiasson-Nilo I, Sonn U, Johannesson K, Gosman-Hedstrom G, Persson GB, Grimby G: **Domestic activities and walking in the elderly: evaluation from a 30-hour heart rate recording.** *Aging (Milano)* 1990, **2**(2):191-198.
41. Fugl-Meyer AR, Jaasko L, Leyman I, Olsson S, Stegling S: **The post-stroke hemiplegic patient. 1. a method for evaluation of physical performance.** *Scand J Rehabil Med* 1975, **7**(1):13-31.
42. Duncan PW, Propst M, Nelson SG: **Reliability of the Fugl-Meyer assessment of sensorimotor recovery following cerebrovascular accident.** *Phys Ther* 1983, **63**(10):1606-1610.
43. van Wijk FM, Pandyan AD, Johnson GR, Barnes MP: **Assessing motor deficits in neurological rehabilitation: patterns of instrument usage.** *Neurorehabil Neural Repair* 2001, **15**(1):23-30.
44. Lyle R: **A performance test for assessment of upper limb function in physical rehabilitation treatment and research.** *Int J Rehabil Res* 1981, **4**(4):483-492.
45. Yozbatiran N, Der-Yeghalian L, Cramer SC: **A standardized approach to performing the action research arm test.** *Neurorehabil Neural Repair* 2008, **22**(1):78-90.
46. Hsieh CL, Hsueh IP, Chiang FM, Lin PH: **Inter-rater reliability and validity of the action research arm test in stroke patients.** *Age Ageing* 1998, **27**(2):107-113.
47. van der Lee JH, Beckerman H, Lankhorst GJ, Bouter LM: **The responsiveness of the Action Research Arm test and the Fugl-Meyer Assessment scale in chronic stroke patients.** *J Rehabil Med* 2001, **33**(3):110-113.
48. Van der Lee JH, De Groot V, Beckerman H, Wagenaar RC, Lankhorst GJ, Bouter LM: **The intra- and interrater reliability of the action research arm test: a practical test of upper extremity function in patients with stroke.** *Arch Phys Med Rehabil* 2001, **82**(1):14-19.
49. Bohannon RW, Smith MB: **Interrater reliability of a modified Ashworth scale of muscle spasticity.** *Phys Ther* 1987, **67**(2):206-207.
50. Gregson JM, Leathley MJ, Moore AP, Smith TL, Sharma AK, Watkins CL: **Reliability of measurements of muscle tone and muscle power in stroke patients.** *Age Ageing* 2000, **29**(3):223-228.
51. Mathiowetz V, Kashman N, Volland G, Weber K, Dowe M, Rogers S: **Grip and pinch strength: normative data for adults.** *Arch Phys Med Rehabil* 1985, **66**(2):69-74.
52. Mathiowetz V, Weber K, Volland G, Kashman N: **Reliability and validity of grip and pinch strength evaluations.** *J Hand Surg Am* 1984, **9**(2):222-226.
53. Murphy MA, Willen C, Sunnerhagen KS: **Kinematic variables quantifying upper-extremity performance after stroke during reaching and drinking from a glass.** *Neurorehabil Neural Repair* 2011, **25**(1):71-80.

Alt Murphy *et al.* *BMC Neurology* 2011, **11**:56  
<http://www.biomedcentral.com/1471-2377/11/56>

54. Murphy MA, Sunnerhagen KS, Johnels B, Willen C: **Three-dimensional kinematic motion analysis of a daily activity drinking from a glass: a pilot study.** *J Neuroeng Rehabil* 2006, **3**:18.
55. Broeren J, Rydmark M, Sunnerhagen KS: **Virtual reality and haptics as a training device for movement rehabilitation after stroke: a single-case study.** *Archives of physical medicine and rehabilitation* 2004, **85**(8):1247-1250.
56. Broeren J, Bjorkdahl A, Pascher R, Rydmark M: **Virtual reality and haptics as an assessment device in the postacute phase after stroke.** *Cyberpsychol Behav* 2002, **5**(3):207-211.
57. Broeren J, Sunnerhagen KS, Rydmark M: **A kinematic analysis of a haptic handheld stylus in a virtual environment: a study in healthy subjects.** *J Neuroengineering Rehabil* 2007, **4**:13.
58. Penta M, Tesio L, Arnould C, Zancan A, Thonnard JL: **The ABILHAND questionnaire as a measure of manual ability in chronic stroke patients: Rasch-based validation and relationship to upper limb impairment.** *Stroke* 2001, **32**(7):1627-1634.
59. Penta M, Thonnard JL, Tesio L: **ABILHAND: a Rasch-built measure of manual ability.** *Arch Phys Med Rehabil* 1998, **79**(9):1038-1042.
60. Gustafsson S, Sunnerhagen K, Dahlin-Ivanoff S: **Occupational therapist's and patients' perception of ABILHAND, a new assessment tool for measuring manual ability.** *Scand J Occup Ther* 2004, **11**:107-117.
61. Duncan PW, Wallace D, Lai SM, Johnson D, Embretson S, Laster LJ: **The stroke impact scale version 2.0. Evaluation of reliability, validity, and sensitivity to change.** *Stroke* 1999, **30**(10):2131-2140.
62. Duncan PW, Bode RK, Min Lai S, Perera S: **Rasch analysis of a new stroke-specific outcome scale: the Stroke Impact Scale.** *Arch Phys Med Rehabil* 2003, **84**(7):950-963.
63. Cardol M, de Haan RJ, de Jong BA, van den Bos GA, de Groot IJ: **Psychometric properties of the Impact on Participation and Autonomy Questionnaire.** *Arch Phys Med Rehabil* 2001, **82**(2):210-216.
64. Cardol M, de Haan RJ, van den Bos GA, de Jong BA, de Groot IJ: **The development of a handicap assessment questionnaire: the Impact on Participation and Autonomy (IPA).** *Clin Rehabil* 1999, **13**(5):411-419.
65. Kersten P, Cardol M, George S, Ward C, Sibley A, White B: **Validity of the impact on participation and autonomy questionnaire: a comparison between two countries.** *Disabil Rehabil* 2007, **29**(19):1502-1509.
66. Rabin R, de Charro F: **EQ-5D: a measure of health status from the EuroQol Group.** *Ann Med* 2001, **33**(5):337-343.
67. Euroqol: **Euro-Qol: a new facility for the measurement of health-related quality of life.** *Health Policy* 1990, **16**:199-208.
68. Rasch G: **Probabilistic models for some intelligence and attainment tests.** Chicago: Chicago University Press; 1980.

#### Pre-publication history

The pre-publication history for this paper can be accessed here:  
<http://www.biomedcentral.com/1471-2377/11/56/prepub>

doi:10.1186/1471-2377-11-56

**Cite this article as:** Alt Murphy *et al.*: SALGOT - Stroke Arm Longitudinal study at the University of Gothenburg, prospective cohort study protocol. *BMC Neurology* 2011 **11**:56.

**Submit your next manuscript to BioMed Central and take full advantage of:**

- Convenient online submission
- Thorough peer review
- No space constraints or color figure charges
- Immediate publication on acceptance
- Inclusion in PubMed, CAS, Scopus and Google Scholar
- Research which is freely available for redistribution

Submit your manuscript at  
[www.biomedcentral.com/submit](http://www.biomedcentral.com/submit)



STROBE 2007 (v4) Statement—Checklist of items that should be included in reports of *cohort studies*

| Section/Topic                | Item # | Recommendation                                                                                                                                                                       | Reported on page # |
|------------------------------|--------|--------------------------------------------------------------------------------------------------------------------------------------------------------------------------------------|--------------------|
| Title and abstract           | 1      | (a) Indicate the study's design with a commonly used term in the title or the abstract                                                                                               | 1,2                |
|                              |        | (b) Provide in the abstract an informative and balanced summary of what was done and what was found                                                                                  | 2                  |
| <b>Introduction</b>          |        |                                                                                                                                                                                      |                    |
| Background/rationale         | 2      | Explain the scientific background and rationale for the investigation being reported                                                                                                 | 4                  |
| Objectives                   | 3      | State specific objectives, including any prespecified hypotheses                                                                                                                     | 4                  |
| <b>Methods</b>               |        |                                                                                                                                                                                      |                    |
| Study design                 | 4      | Present key elements of study design early in the paper                                                                                                                              | 5                  |
| Setting                      | 5      | Describe the setting, locations, and relevant dates, including periods of recruitment, exposure, follow-up, and data collection                                                      | 5                  |
| Participants                 | 6      | (a) Give the eligibility criteria, and the sources and methods of selection of participants. Describe methods of follow-up                                                           | 5                  |
|                              |        | (b) For matched studies, give matching criteria and number of exposed and unexposed                                                                                                  |                    |
| Variables                    | 7      | Clearly define all outcomes, exposures, predictors, potential confounders, and effect modifiers. Give diagnostic criteria, if applicable                                             | 6-8                |
| Data sources/<br>measurement | 8*     | For each variable of interest, give sources of data and details of methods of assessment (measurement). Describe comparability of assessment methods if there is more than one group | 7,8                |
| Bias                         | 9      | Describe any efforts to address potential sources of bias                                                                                                                            | 16, study protocol |
| Study size                   | 10     | Explain how the study size was arrived at                                                                                                                                            | 5, figure 1        |
| Quantitative variables       | 11     | Explain how quantitative variables were handled in the analyses. If applicable, describe which groupings were chosen and why                                                         | 6-8                |
| Statistical methods          | 12     | (a) Describe all statistical methods, including those used to control for confounding                                                                                                | 8,9                |
|                              |        | (b) Describe any methods used to examine subgroups and interactions                                                                                                                  | 8,9                |
|                              |        | (c) Explain how missing data were addressed                                                                                                                                          | 9                  |
|                              |        | (d) If applicable, explain how loss to follow-up was addressed                                                                                                                       | 5                  |
|                              |        | (e) Describe any sensitivity analyses                                                                                                                                                | 9                  |
| <b>Results</b>               |        |                                                                                                                                                                                      |                    |

|                          |     |                                                                                                                                                                                                              |          |
|--------------------------|-----|--------------------------------------------------------------------------------------------------------------------------------------------------------------------------------------------------------------|----------|
| Participants             | 13* | (a) Report numbers of individuals at each stage of study—eg numbers potentially eligible, examined for eligibility, confirmed eligible, included in the study, completing follow-up, and analysed            | Figure 1 |
|                          |     | (b) Give reasons for non-participation at each stage                                                                                                                                                         | Figure 1 |
|                          |     | (c) Consider use of a flow diagram                                                                                                                                                                           | Figure 1 |
| Descriptive data         | 14* | (a) Give characteristics of study participants (eg demographic, clinical, social) and information on exposures and potential confounders                                                                     | 7        |
|                          |     | (b) Indicate number of participants with missing data for each variable of interest                                                                                                                          | 7        |
|                          |     | (c) Summarise follow-up time (eg, average and total amount)                                                                                                                                                  |          |
| Outcome data             | 15* | Report numbers of outcome events or summary measures over time                                                                                                                                               | 11       |
| Main results             | 16  | (a) Give unadjusted estimates and, if applicable, confounder-adjusted estimates and their precision (eg, 95% confidence interval). Make clear which confounders were adjusted for and why they were included | 11       |
|                          |     | (b) Report category boundaries when continuous variables were categorized                                                                                                                                    | 7,8      |
|                          |     | (c) If relevant, consider translating estimates of relative risk into absolute risk for a meaningful time period                                                                                             |          |
| Other analyses           | 17  | Report other analyses done—eg analyses of subgroups and interactions, and sensitivity analyses                                                                                                               | 9-12     |
| <b>Discussion</b>        |     |                                                                                                                                                                                                              |          |
| Key results              | 18  | Summarise key results with reference to study objectives                                                                                                                                                     | 12       |
| <b>Limitations</b>       |     |                                                                                                                                                                                                              |          |
| Interpretation           | 20  | Give a cautious overall interpretation of results considering objectives, limitations, multiplicity of analyses, results from similar studies, and other relevant evidence                                   | 12-17    |
| Generalisability         | 21  | Discuss the generalisability (external validity) of the study results                                                                                                                                        | 13,16,17 |
| <b>Other information</b> |     |                                                                                                                                                                                                              |          |
| Funding                  | 22  | Give the source of funding and the role of the funders for the present study and, if applicable, for the original study on which the present article is based                                                | 18       |

\*Give information separately for cases and controls in case-control studies and, if applicable, for exposed and unexposed groups in cohort and cross-sectional studies.

**Note:** An Explanation and Elaboration article discusses each checklist item and gives methodological background and published examples of transparent reporting. The STROBE checklist is best used in conjunction with this article (freely available on the Web sites of PLoS Medicine at <http://www.plosmedicine.org/>, Annals of Internal Medicine at <http://www.annals.org/>, and Epidemiology at <http://www.epidem.com/>). Information on the STROBE Initiative is available at [www.strobe-statement.org](http://www.strobe-statement.org).
